# Supplementary material for: Potential Infection Risks of the Wheat Stripe Rust and Stem Rust Pathogens on Barberry in Asia and Southeastern Europe
Source: MDPI journal article supplement (doi:10.3390/plants10050957), 2021-05-11
Supplement: s1 [file s1]

**Table S1.** Elevations, latitudes, longitudes, monthly infection index (MINF), Fav-month (F) and infection risk (MINF x F) values of 607 locations for the stripe rust pathogen, *Puccinia striil* *P. graminis* f. sp. *tritici* (Pgt) in relation to barberry growth in Asia and adjoining European region

| Region and Country |                          | Location | Code   | Elevation (m) | Latitude (°N) | Longitude (°E) | Pst      |               |                          |            |
|--------------------|--------------------------|----------|--------|---------------|---------------|----------------|----------|---------------|--------------------------|------------|
|                    |                          |          |        |               |               |                | MINF (A) | Fav-month (F) | Favourable index (A x F) | Risk score |
| East Asia (250)    |                          |          |        |               |               |                |          |               |                          |            |
| Bangladesh         | Nalian Range, BD         | BD1      | 4.2    | 22.1986       | 89.4880       | 0.0000         | 0        | 0.0000        | 0                        | 0          |
| Bangladesh         | Rangamati, BD            | BD2      | 546.6  | 25.0170       | 91.2898       | 0.0041         | 0.33     | 0.0014        | 0                        | 4          |
| Bangladesh         | Genduram, BD             | BD3      | 82.3   | 25.5335       | 89.6638       | 0.0000         | 0        | 0.0000        | 0                        | 0          |
| Bangladesh         | Durgaour, BD             | BD4      | 6.6    | 22.9695       | 91.1579       | 0.0000         | 0        | 0.0000        | 0                        | 0          |
| Bangladesh         | Ati Ulain, BD            | BD5      | 9.8    | 23.9772       | 89.8835       | 0.0000         | 0        | 0.0000        | 0                        | 0          |
| Bhutan             | Wangdue Phodrang, BH     | BH1      | 3903.8 | 27.6991       | 90.2955       | 0.2095         | 0.33     | 0.0691        | 1                        | 4          |
| Bhutan             | Samdrup Jongkhar, BH     | BH2      | 618.9  | 26.9035       | 91.1909       | 0.0067         | 0.17     | 0.0011        | 0                        | 2          |
| Bhutan             | Gasa, BH                 | BH3      | 3911.5 | 27.8789       | 89.9055       | 0.0913         | 0.25     | 0.0228        | 1                        | 3          |
| Bhutan             | Lhuntse, BH              | BH4      | 3305.8 | 27.7332       | 91.2348       | 0.0229         | 0.25     | 0.0057        | 0                        | 3          |
| Bhutan             | Kangpar, BH              | BH5      | 2178.5 | 27.2166       | 91.7842       | 0.0501         | 0.17     | 0.0085        | 1                        | 2          |
| Bhutan             | Xigate, BH               | BH6      | 3924.5 | 27.5190       | 88.8948       | 0.1439         | 0.25     | 0.0360        | 1                        | 3          |
| Bhutan             | Putao 2, BH              | BH7      | 2533.8 | 27.0112       | 98.2134       | 0.1087         | 0.25     | 0.0272        | 1                        | 3          |
| Bhutan             | Putao 3, BH              | BH8      | 926.5  | 26.7859       | 98.7077       | 0.0141         | 0.17     | 0.0024        | 0                        | 2          |
| Bhutan             | Daifam, BH               | BH9      | 631.3  | 26.9427       | 92.0698       | 0.0145         | 0.25     | 0.0036        | 0                        | 3          |
| China              | Litang, Sichuan, CH      | CH1      | 4184.1 | 29.4684       | 100.4476      | 0.0130         | 0.17     | 0.0022        | 0                        | 2          |
| China              | Batang 1, Sichuan, CH    | CH2      | 3958.5 | 29.2778       | 99.3682       | 0.0172         | 0.25     | 0.0043        | 0                        | 3          |
| China              | Kangding, Sichuan, CH    | CH3      | 3980.7 | 29.5066       | 101.8538      | 0.0112         | 0.33     | 0.0037        | 0                        | 4          |
| China              | Shawan 1, Sichuan, CH    | CH4      | 774.9  | 29.2002       | 103.6116      | 0.2691         | 0.67     | 0.1803        | 2                        | 8          |
| China              | Suijiang, Yunnan, CH     | CH5      | 1176.4 | 28.5460       | 103.8753      | 0.2851         | 0.83     | 0.2366        | 2                        | 10         |
| China              | Dechang, Sichuan, CH     | CH6      | 2238.6 | 27.1863       | 102.2933      | 0.0599         | 0.17     | 0.0102        | 1                        | 2          |
| China              | Huangling, Shaanxi, CH   | CH7      | 1307.4 | 35.6127       | 108.7532      | 0.0465         | 0.17     | 0.0079        | 0                        | 2          |
| China              | Jiaokou, Shaanxi, CH     | CH8      | 1289.2 | 37.0289       | 111.2581      | 0.0254         | 0.17     | 0.0043        | 0                        | 2          |
| China              | Shennonhjia, Hubei, CH   | CH9      | 1056.5 | 31.7750       | 110.6868      | 0.0236         | 0.25     | 0.0059        | 0                        | 3          |
| China              | Kaixian, Chongqing, CH   | CH10     | 731.7  | 31.4006       | 108.2698      | 0.0963         | 0.58     | 0.0559        | 1                        | 7          |
| China              | Hejiang, Sichuan, CH     | CH11     | 538    | 28.6618       | 105.6331      | 0.2081         | 0.58     | 0.1207        | 2                        | 7          |
| China              | Alxa, Inner Mongolia, CH | CH12     | 1888.9 | 38.9339       | 101.5023      | 0.0293         | 0.17     | 0.0050        | 0                        | 2          |

| Region and<br>Country |                           | Code | Elevation<br>(m) | Latitude<br>(°N) | Longitude<br>(°E) | Pst         |                  |                             |               |       |
|-----------------------|---------------------------|------|------------------|------------------|-------------------|-------------|------------------|-----------------------------|---------------|-------|
|                       |                           |      |                  |                  |                   | MINF<br>(A) | Fav-month<br>(F) | Favourable index<br>(A x F) | Risk<br>score | Month |
| China                 | Tianzhu, Gansu, CH        | CH13 | 2836.8           | 37.3091          | 102.7327          | 0.0121      | 0.25             | 0.0030                      | 0             | 3     |
| China                 | Guinan, Qinghai, CH       | CH14 | 3405.9           | 35.5412          | 101.2825          | 0.0000      | 0                | 0.0000                      | 0             | 0     |
| China                 | Nanzhao, Henan, CH        | CH15 | 388.9            | 33.3306          | 112.3567          | 0.0143      | 0.33             | 0.0047                      | 0             | 4     |
| China                 | Zhenxiong, Yunnan, CH     | CH16 | 1272.1           | 27.5376          | 105.1497          | 0.1846      | 0.58             | 0.1071                      | 2             | 7     |
| China                 | Fengqing, Yunnan, CH      | CH17 | 1666.8           | 24.4972          | 99.9642           | 0.0274      | 0.33             | 0.0091                      | 1             | 4     |
| China                 | Batang 2, Sichuan, CH     | CH18 | 3958.5           | 29.1618          | 99.3050           | 0.0172      | 0.25             | 0.0043                      | 0             | 3     |
| China                 | Daguan, Yunnan, CH        | CH19 | 1029.5           | 28.0818          | 104.0071          | 0.2235      | 0.67             | 0.1497                      | 2             | 8     |
| China                 | Danba, Sichuan, CH        | CH20 | 3756.5           | 30.9117          | 101.9857          | 0.0050      | 0.08             | 0.0004                      | 0             | 1     |
| China                 | Dayi, Sichuan, CH         | CH21 | 2073.4           | 30.5632          | 103.4297          | 0.3144      | 0.58             | 0.1824                      | 2             | 7     |
| China                 | Shawan 2, Sicuan, CH      | CH22 | 774.9            | 29.3065          | 103.5176          | 0.2691      | 0.67             | 0.1803                      | 2             | 8     |
| China                 | Junlian xian, Sichuan, CH | CH23 | 1029.5           | 28.0342          | 104.4404          | 0.2235      | 0.67             | 0.1497                      | 2             | 8     |
| China                 | Banan, Chongqing, CH      | CH24 | 604.5            | 29.3832          | 106.8574          | 0.1795      | 0.58             | 0.1041                      | 2             | 7     |
| China                 | Xixia, Henan, CH          | CH25 | 571.3            | 33.4690          | 111.2969          | 0.0205      | 0.25             | 0.0051                      | 0             | 3     |
| China                 | Taibai, Shaanxi, CH       | CH26 | 1407.4           | 33.8714          | 107.6924          | 0.0648      | 0.08             | 0.0052                      | 0             | 1     |
| China                 | Wangyi, Shaanxi, CH       | CH27 | 923.2            | 35.0669          | 109.1426          | 0.0501      | 0.17             | 0.0085                      | 1             | 2     |
| China                 | Maiji, Gansu, CH          | CH28 | 1547.8           | 34.1628          | 106.4619          | 0.0330      | 0.17             | 0.0056                      | 0             | 2     |
| China                 | Zhenba, Shaanxi, CH       | CH29 | 1038.5           | 32.4366          | 107.7363          | 0.0795      | 0.42             | 0.0334                      | 1             | 5     |
| China                 | Tewo, Gansu, CH           | CH30 | 3180.8           | 33.9443          | 103.8691          | 0.0000      | 0                | 0.0000                      | 0             | 0     |
| China                 | Jiuzhi, Qinghai, CH       | CH31 | 4029.8           | 33.3223          | 101.4521          | 0.0000      | 0                | 0.0000                      | 0             | 0     |
| China                 | Wudu, Gansu, CH           | CH32 | 1632.2           | 33.4324          | 105.0556          | 0.0389      | 0.08             | 0.0031                      | 0             | 1     |
| China                 | Jiulong, Sichuan, CH      | CH33 | 3441.7           | 28.8072          | 101.6279          | 0.0667      | 0.42             | 0.0280                      | 1             | 5     |
| China                 | Xinlong, Sichuan, CH      | CH34 | 4386.6           | 30.6790          | 99.9497           | 0.0000      | 0                | 0.0000                      | 0             | 0     |
| China                 | Yanyuan, Sichuan, CH      | CH35 | 2585.9           | 27.5775          | 101.6643          | 0.0510      | 0.25             | 0.0128                      | 1             | 3     |
| China                 | Huize, Yunnan, CH         | CH36 | 2176.1           | 26.6681          | 103.6089          | 0.0308      | 0.25             | 0.0077                      | 0             | 3     |
| China                 | Jinsha, Guizhou, CH       | CH37 | 1089.4           | 27.4313          | 106.5203          | 0.1127      | 0.5              | 0.0564                      | 1             | 6     |
| China                 | Mohe, Heilongjiang, CH    | CH38 | 708.8            | 52.7868          | 121.8757          | 0.0548      | 0.42             | 0.0230                      | 1             | 5     |
| China                 | Jianning, Fujian, CH      | CH39 | 463.6            | 26.6607          | 116.8055          | 0.1149      | 0.25             | 0.0287                      | 1             | 3     |
| China                 | Yuxian, Yunnan, CH        | CH40 | 1666.8           | 24.2405          | 99.9745           | 0.0274      | 0.33             | 0.0091                      | 1             | 4     |
| China                 | Putao 4, Mym              | CH41 | 1195.3           | 26.6670          | 97.8651           | 0.0145      | 0.25             | 0.0036                      | 0             | 3     |

| Region and<br>Country |  | Location                       | Code | Elevation<br>(m) | Latitude<br>(°N) | Longitude<br>(°E) | Pst         |                  |                             |                     |
|-----------------------|--|--------------------------------|------|------------------|------------------|-------------------|-------------|------------------|-----------------------------|---------------------|
|                       |  |                                |      |                  |                  |                   | MINF<br>(A) | Fav-month<br>(F) | Favourable index<br>(A x F) | Risk<br>score Month |
| China                 |  | Maizhokunggar, Lhasa, CH       | CH42 | 4832.9           | 30.0701          | 91.7677           | 0.0000      | 0                | 0.0000                      | 0 0                 |
| China                 |  | Dengqen, Tibet, CH             | CH43 | 4781.1           | 32.1115          | 95.1405           | 0.0000      | 0                | 0.0000                      | 0 0                 |
| China                 |  | Sunan, Gansu, CH               | CH44 | 3684.6           | 38.3684          | 99.9525           | 0.0000      | 0                | 0.0000                      | 0 0                 |
| China                 |  | Tahe, Heilongjiang, CH         | CH45 | 451.9            | 52.4952          | 125.4573          | 0.0571      | 0.33             | 0.0188                      | 1 4                 |
| China                 |  | Yakeshi, Inner Mongolis, CH    | CH46 | 907.6            | 50.6206          | 121.7274          | 0.0083      | 0.17             | 0.0014                      | 0 2                 |
| China                 |  | Jinshantun, Heilongjiang, CH   | CH47 | 411.1            | 47.3042          | 129.4618          | 0.0050      | 0.17             | 0.0009                      | 0 2                 |
| China                 |  | Zalantun, Inner Mongolia, CH   | CH48 | 923.3            | 47.8674          | 121.3319          | 0.0034      | 0.08             | 0.0003                      | 0 1                 |
| China                 |  | Zamtang, Sikuana, CH           | CH49 | 4088.9           | 31.6847          | 101.2049          | 0.0000      | 0                | 0.0000                      | 0 0                 |
| China                 |  | Wuxi, Chongqing, CH            | CH50 | 1353             | 31.6099          | 109.4227          | 0.0485      | 0.33             | 0.0160                      | 1 4                 |
| China                 |  | Yongding, Huanan, CH           | CH51 | 590.2            | 29.3377          | 110.2577          | 0.1299      | 0.58             | 0.0753                      | 1 7                 |
| China                 |  | Xiushui, Jiangxi, CH           | CH52 | 302.9            | 29.0307          | 114.3446          | 0.1081      | 0.58             | 0.0627                      | 1 7                 |
| China                 |  | Yingde, Guangdong, CH          | CH53 | 291.3            | 24.4007          | 113.6415          | 0.0982      | 0.17             | 0.0167                      | 1 2                 |
| China                 |  | Tian'e, Guangxi, CH            | CH54 | 791.7            | 24.8002          | 106.7420          | 0.0809      | 0.33             | 0.0267                      | 1 4                 |
| China                 |  | Baiyu, Sichuan, CH             | CH55 | 4334.3           | 31.2419          | 99.5625           | 0.0000      | 0                | 0.0000                      | 0 0                 |
| China                 |  | Alxa Zuoqi, Inner Mongolia, CH | CH56 | 1331.6           | 39.2672          | 104.4844          | 0.0023      | 0.08             | 0.0002                      | 0 1                 |
| China                 |  | Biru, Tibet, CH                | CH57 | 4912.3           | 30.9927          | 93.9485           | 0.0000      | 0                | 0.0000                      | 0 0                 |
| China                 |  | Nagqu 1, Tibet, CH             | CH58 | 4891.6           | 31.4062          | 92.6521           | 0.0000      | 0                | 0.0000                      | 0 0                 |
| China                 |  | Nagqu 2, Tibet, CH             | CH59 | 4831.4           | 31.1151          | 91.6084           | 0.0000      | 0                | 0.0000                      | 0 0                 |
| China                 |  | Gyaca 1, Tibet, CH             | CH60 | 4702.1           | 29.2203          | 92.8993           | 0.0015      | 0.08             | 0.0001                      | 0 1                 |
| China                 |  | Nangxian, Tibet, CH            | CH61 | 4089.9           | 28.7869          | 93.2305           | 0.0168      | 0.17             | 0.0029                      | 0 2                 |
| China                 |  | Jiulong, Sichuan, CH           | CH62 | 3779.8           | 28.6337          | 101.4741          | 0.0503      | 0.33             | 0.0166                      | 1 4                 |
| China                 |  | Wenxian, Gansu, CH             | CH63 | 1872.1           | 32.7882          | 104.5942          | 0.0485      | 0.17             | 0.0082                      | 1 2                 |
| China                 |  | Wenchuan, Sichuan, CH          | CH64 | 2889.9           | 31.1668          | 103.2319          | 0.1251      | 0.42             | 0.0525                      | 1 5                 |
| China                 |  | Barkam, Sichuan, CH            | CH65 | 3745.5           | 32.0835          | 101.9575          | 0.0000      | 0                | 0.0000                      | 0 0                 |
| China                 |  | Hongya, Sichuan, CH            | CH66 | 1088.4           | 29.5075          | 103.0506          | 0.3338      | 0.83             | 0.2771                      | 2 10                |
| China                 |  | Hanyuan, Sichuan, CH           | CH67 | 2864.4           | 29.6174          | 102.3805          | 0.1449      | 0.5              | 0.0725                      | 1 6                 |
| China                 |  | Butuo 1, Sichuan, CH           | CH68 | 3953.2           | 29.2443          | 101.8916          | 0.0312      | 0.33             | 0.0103                      | 1 4                 |
| China                 |  | Butuo 2, Sichuan, CH           | CH69 | 2372.5           | 27.6359          | 102.8913          | 0.0769      | 0.42             | 0.0323                      | 1 5                 |
| China                 |  | Muchuan, Sichuan, CH           | CH70 | 1176.4           | 28.8360          | 103.9021          | 0.2851      | 0.83             | 0.2366                      | 2 10                |

| Region and Country |  | Location                | Code | Elevation (m) | Latitude (°N) | Longitude (°E) | Pst      |               |                          |                  |
|--------------------|--|-------------------------|------|---------------|---------------|----------------|----------|---------------|--------------------------|------------------|
|                    |  |                         |      |               |               |                | MINF (A) | Fav-month (F) | Favourable index (A x F) | Risk score Month |
| China              |  | Leibo, Sichuan, CH      | CH71 | 1567.4        | 28.3199       | 103.7043       | 0.2536   | 0.58          | 0.1471                   | 2 7              |
| China              |  | Luquan, Yunnan, CH      | CH72 | 1987.5        | 25.9146       | 102.3860       | 0.0158   | 0.08          | 0.0013                   | 0 1              |
| China              |  | Lanping, Yunnan, CH     | CH73 | 2739          | 26.5797       | 99.2494        | 0.0902   | 0.33          | 0.0298                   | 1 4              |
| China              |  | Huili, Sichuan, CH      | CH74 | 2026.9        | 26.7859       | 102.4629       | 0.0399   | 0.17          | 0.0068                   | 0 2              |
| China              |  | Dayao, Yunnan, CH       | CH75 | 2039.1        | 26.0183       | 101.1390       | 0.0250   | 0.25          | 0.0063                   | 0 3              |
| China              |  | Mainling, Tibet, CH     | CH76 | 3752.1        | 29.3401       | 94.2012        | 0.0328   | 0.33          | 0.0108                   | 1 4              |
| China              |  | Jinchuan, Sichuan, CH   | CH77 | 3737.3        | 31.1386       | 102.0234       | 0.0052   | 0.17          | 0.0009                   | 0 2              |
| China              |  | Zhuanglang, Gansu, CH   | CH78 | 1817.4        | 35.1927       | 105.8686       | 0.0278   | 0.25          | 0.0069                   | 0 3              |
| China              |  | Zhenyuan, Gansu, CH     | CH79 | 1366.9        | 35.8989       | 107.1321       | 0.0460   | 0.17          | 0.0078                   | 0 2              |
| China              |  | Dingbian, Shaanxi, CH   | CH80 | 1508.9        | 37.0522       | 107.5646       | 0.0288   | 0.17          | 0.0049                   | 0 2              |
| China              |  | Qilian, Qinghai, CH     | CH81 | 3572.4        | 37.7542       | 100.7929       | 0.0043   | 0.08          | 0.0003                   | 0 1              |
| China              |  | Nanbu, Sichuan, CH      | CH82 | 448.7         | 31.2419       | 105.8906       | 0.0930   | 0.25          | 0.0233                   | 1 3              |
| China              |  | Ulan 2, Qinghai, CH     | CH83 | 3683.4        | 37.0561       | 98.3320        | 0.0018   | 0.08          | 0.0001                   | 0 1              |
| China              |  | Jomdo, Tibet, CH        | CH84 | 4398.9        | 32.2881       | 97.4531        | 0.0000   | 0             | 0.0000                   | 0 0              |
| China              |  | Wenchuan 2, Sichuan, CH | CH85 | 2576.4        | 31.5115       | 103.5824       | 0.1991   | 0.33          | 0.0657                   | 1 4              |
| China              |  | Pengzhou, Sichuan, CH   | CH86 | 1759.8        | 31.0956       | 103.8605       | 0.3798   | 0.58          | 0.2203                   | 2 7              |
| China              |  | Mianzhu, Sichuan, CH    | CH87 | 979.2         | 31.3992       | 104.0419       | 0.1939   | 0.58          | 0.1124                   | 2 7              |
| China              |  | Pingshan 2, Sichuan, CH | CH88 | 671.2         | 28.8144       | 104.2509       | 0.1846   | 0.67          | 0.1237                   | 2 8              |
| China              |  | Suijiang 2, Yunnan, CH  | CH89 | 1176.4        | 28.6144       | 103.9131       | 0.2851   | 0.83          | 0.2366                   | 2 10             |
| China              |  | Shuifu, Yunan, CH       | CH90 | 1029.5        | 28.4600       | 104.2207       | 0.2235   | 0.67          | 0.1497                   | 2 8              |
| China              |  | Tewo 2, Gansu, CH       | CH91 | 3180.8        | 33.9802       | 103.5977       | 0.0000   | 0             | 0.0000                   | 0 0              |
| China              |  | Meigu 2, Sichuan, CH    | CH92 | 1934.7        | 28.7679       | 103.1637       | 0.2241   | 0.58          | 0.1300                   | 2 7              |
| China              |  | Ebian, Sichuan, CH      | CH93 | 1491.2        | 29.0947       | 103.4239       | 0.2970   | 0.67          | 0.1990                   | 2 8              |
| China              |  | Mabian, Sichuan, CH     | CH94 | 1934.7        | 28.7946       | 103.3180       | 0.2241   | 0.58          | 0.1300                   | 2 7              |
| China              |  | Wenchuan 3, Sichuan, CH | CH95 | 2073.4        | 30.9288       | 103.2875       | 0.3144   | 0.58          | 0.1824                   | 2 7              |
| China              |  | Ge'gyai, Tibet, CH      | CH96 | 5200.6        | 31.2560       | 82.7681        | 0.0000   | 0             | 0.0000                   | 0 0              |
| China              |  | Karakax, Xinjiang, CH   | CH97 | 1227.1        | 38.2865       | 79.8238        | 0.0026   | 0.08          | 0.0002                   | 0 1              |
| China              |  | Hoboksar, Xinjiang, CH  | CH98 | 500.1         | 45.5956       | 87.0308        | 0.0123   | 0.17          | 0.0021                   | 0 2              |
| China              |  | Hejing, Xinjiang, CH    | CH99 | 2770.2        | 42.7599       | 86.5035        | 0.0000   | 0             | 0.0000                   | 0 0              |

| Region and<br>Country |                                     | Code  | Elevation<br>(m) | Latitude<br>(°N) | Longitude<br>(°E) | Pst         |                  |                             |               |       |
|-----------------------|-------------------------------------|-------|------------------|------------------|-------------------|-------------|------------------|-----------------------------|---------------|-------|
|                       |                                     |       |                  |                  |                   | MINF<br>(A) | Fav-month<br>(F) | Favourable index<br>(A x F) | Risk<br>score | Month |
| China                 | Kumul, Xinjiang, CH                 | CH100 | 1427.4           | 41.3900          | 94.0620           | 0.0000      | 0                | 0.0000                      | 0             | 0     |
| China                 | Ruoqiang, Xinjiang, CH              | CH101 | 3060.9           | 38.8363          | 90.3706           | 0.0086      | 0.08             | 0.0007                      | 0             | 1     |
| China                 | Zhidoi, Qinghai, CH                 | CH102 | 4975.1           | 35.3317          | 91.3374           | 0.0000      | 0                | 0.0000                      | 0             | 0     |
| China                 | Shuanghu, Tibet, CH                 | CH103 | 4792.1           | 32.2648          | 90.3706           | 0.0000      | 0                | 0.0000                      | 0             | 0     |
| China                 | Zhengxiangbaiqi, Inner Mongolia, CH | CH104 | 1201.9           | 42.8244          | 114.7163          | 0.0000      | 0                | 0.0000                      | 0             | 0     |
| China                 | Urad Houqi, Inner Mongolia, CH      | CH105 | 1454.1           | 41.3900          | 106.7183          | 0.0000      | 0                | 0.0000                      | 0             | 0     |
| China                 | Aba, Sichuan, CH                    | CH106 | 3830.1           | 31.8975          | 102.2082          | 0.0379      | 0.17             | 0.0064                      | 0             | 2     |
| China                 | Baoji2, Shaanxi, CH                 | CH107 | 1368.9           | 34.3787          | 107.1298          | 0.0853      | 0.33             | 0.0282                      | 1             | 4     |
| China                 | Bazhong, Sichuan, CH                | CH108 | 597.9            | 31.8666          | 106.7181          | 0.1362      | 0.58             | 0.0790                      | 1             | 7     |
| China                 | Chengxian, Gansu, CH                | CH109 | 1489.3           | 33.7436          | 105.6880          | 0.0703      | 0.33             | 0.0232                      | 1             | 4     |
| China                 | Dali, Yunan, CH                     | CH110 | 2212.9           | 25.6058          | 100.1786          | 0.0489      | 0.17             | 0.0083                      | 1             | 2     |
| China                 | Degen, Yunan, CH                    | CH111 | 1714.4           | 24.1786          | 100.7496          | 0.0206      | 0.17             | 0.0035                      | 0             | 2     |
| China                 | Deyang, Sichuan, CH                 | CH112 | 979.2            | 31.1405          | 104.3301          | 0.2742      | 0.67             | 0.1837                      | 2             | 8     |
| China                 | Dinxi, Gansu, CH                    | CH113 | 1982.8           | 35.5888          | 104.6410          | 0.0133      | 0.17             | 0.0023                      | 0             | 2     |
| China                 | Fengxian, Shaanxi, CH               | CH114 | 1444.4           | 33.9258          | 106.5501          | 0.0982      | 0.33             | 0.0324                      | 1             | 4     |
| China                 | Gnagu, Gansu, CH                    | CH115 | 1852.8           | 34.7232          | 105.3472          | 0.0380      | 0.25             | 0.0095                      | 1             | 3     |
| China                 | Gannan, Gansu, CH                   | CH116 | 2022.9           | 36.4891          | 103.6229          | 0.0018      | 0.08             | 0.0001                      | 0             | 1     |
| China                 | Ganzi, Sichuan, CH                  | CH117 | 3897.4           | 30.0683          | 101.9874          | 0.0391      | 0.25             | 0.0098                      | 1             | 3     |
| China                 | Guangyuan, Sichuan, CH              | CH118 | 845.9            | 32.4557          | 105.4557          | 0.1336      | 0.58             | 0.0775                      | 1             | 7     |
| China                 | Haixi, Qinghai, CH                  | CH119 | 3362.6           | 37.3859          | 97.3790           | 0.0081      | 0.08             | 0.0007                      | 0             | 1     |
| China                 | Hanzong, Shaanxi, CH                | CH120 | 1140.6           | 33.0695          | 106.9625          | 0.1791      | 0.58             | 0.1039                      | 2             | 7     |
| China                 | Huixian, Gansu, CH                  | CH121 | 1402.6           | 33.7688          | 106.0569          | 0.0749      | 0.33             | 0.0247                      | 1             | 4     |
| China                 | Lueyang, Shaanxi, CH                | CH122 | 1249.6           | 34.6303          | 107.1306          | 0.0606      | 0.42             | 0.0255                      | 1             | 5     |
| China                 | Kunming, Yunan, CH                  | CH123 | 1938.5           | 24.9522          | 102.8935          | 0.0202      | 0.08             | 0.0016                      | 0             | 1     |
| China                 | Lanzhou, Gansu, CH                  | CH124 | 2022.9           | 36.4891          | 103.6229          | 0.0018      | 0.08             | 0.0001                      | 0             | 1     |
| China                 | Linagdang, Gansu, CH                | CH125 | 1402.6           | 33.9050          | 106.2660          | 0.2618      | 0.33             | 0.0864                      | 1             | 4     |
| China                 | Liangshun, Sichuan, CH              | CH126 | 2438.1           | 27.8584          | 102.2765          | 0.0434      | 0.25             | 0.0108                      | 1             | 3     |
| China                 | Lijiang, Yunan, CH                  | CH127 | 2618.8           | 26.8624          | 100.1740          | 0.0387      | 0.17             | 0.0066                      | 0             | 2     |
| China                 | Linxia, Gansu, CH                   | CH128 | 2270.8           | 35.5903          | 103.2469          | 0.0168      | 0.25             | 0.0042                      | 0             | 3     |

| Region and<br>Country |  | Location                                 | Code  | Elevation<br>(m) | Latitude<br>(°N) | Longitude<br>(°E) | Pst         |                  |                             |                        |
|-----------------------|--|------------------------------------------|-------|------------------|------------------|-------------------|-------------|------------------|-----------------------------|------------------------|
|                       |  |                                          |       |                  |                  |                   | MINF<br>(A) | Fav-month<br>(F) | Favourable index<br>(A x F) | Risk<br>score    Month |
| China                 |  | Lixian, Gansu, CH                        | CH129 | 1852.8           | 34.7232          | 105.3472          | 0.0380      | 0.25             | 0.0095                      | 1    3                 |
| China                 |  | Longnan, Gansu, CH                       | CH130 | 2070.6           | 33.3986          | 104.9376          | 0.0992      | 0.42             | 0.0417                      | 1    5                 |
| China                 |  | Maijigen, Gansu, CH                      | CH131 | 1547.8           | 34.3881          | 106.0023          | 0.0623      | 0.33             | 0.0205                      | 1    4                 |
| China                 |  | Mianyang, Sichuan, CH                    | CH132 | 601.3            | 31.4811          | 104.6458          | 0.1521      | 0.58             | 0.0882                      | 1    7                 |
| China                 |  | Panlogjhen, Shaanxi, CH                  | CH133 | 1368.9           | 34.4162          | 107.2039          | 0.0853      | 0.33             | 0.0282                      | 1    4                 |
| China                 |  | Panzihua, Sichuan, CH                    | CH134 | 1901.9           | 26.6374          | 101.7038          | 0.0385      | 0.08             | 0.0031                      | 0    1                 |
| China                 |  | Qiangyang2, Sichuan, CH                  | CH135 | 1249.6           | 34.6281          | 107.0939          | 0.0606      | 0.42             | 0.0255                      | 1    5                 |
| China                 |  | Qingshui, Gansu, CH                      | CH136 | 1720.2           | 34.7068          | 106.1763          | 0.0558      | 0.33             | 0.0184                      | 1    4                 |
| China                 |  | Shannan, Tibet, CH                       | CH137 | 4597.2           | 29.2622          | 91.7658           | 0.0000      | 0                | 0.0000                      | 0    0                 |
| China                 |  | Taibai2, Shaanxi, CH                     | CH138 | 1368.9           | 34.0594          | 107.3061          | 0.0853      | 0.33             | 0.0282                      | 1    4                 |
| China                 |  | Tianshui, Gansu, CH                      | CH139 | 1671.9           | 34.5621          | 105.7233          | 0.0435      | 0.33             | 0.0143                      | 1    4                 |
| China                 |  | Wangchuamjen, Gansu, CH                  | CH140 | 1583.9           | 34.2247          | 105.5837          | 0.0635      | 0.33             | 0.0210                      | 1    4                 |
| China                 |  | Yaan, Sichuan, CH                        | CH141 | 1765.3           | 29.9757          | 102.9928          | 0.4467      | 0.67             | 0.2993                      | 2    8                 |
| China                 |  | Yuxi, Yunan                              | CH142 | 1713.7           | 24.3535          | 102.4571          | 0.0172      | 0.17             | 0.0029                      | 0    2                 |
| India                 |  | Deema Range, Uttarakhand, IN             | IN1   | 891.9            | 29.6318          | 78.8533           | 0.0062      | 0.17             | 0.0011                      | 0    2                 |
| India                 |  | Champawat, UK                            | IN2   | 1445.4           | 29.0187          | 80.6770           | 0.0703      | 0.33             | 0.0232                      | 1    4                 |
| India                 |  | Lunglei, Mizoram, IN                     | IN3   | 555.2            | 22.9518          | 92.9432           | 0.0017      | 0.17             | 0.0003                      | 0    2                 |
| India                 |  | Devidhura Range, Uttarakhand, IN         | IN4   | 864.4            | 29.2682          | 79.9737           | 0.0116      | 0.33             | 0.0038                      | 0    4                 |
| India                 |  | Kheti, Uttarakhand, IN                   | IN5   | 2163.9           | 29.9083          | 80.1387           | 0.1587      | 0.25             | 0.0397                      | 1    3                 |
| India                 |  | Birgola, Uttarakhand, IN                 | IN6   | 1116.5           | 29.2120          | 80.2774           | 0.0450      | 0.33             | 0.0148                      | 1    4                 |
| India                 |  | Dharkot, Uttarakhand, IN                 | IN7   | 2191.9           | 30.6558          | 78.2318           | 0.0778      | 0.25             | 0.0195                      | 1    3                 |
| India                 |  | DPF Nanhani, Himachal Pradesh, IN        | IN8   | 2675.8           | 31.7739          | 77.1002           | 0.1508      | 0.17             | 0.0256                      | 1    2                 |
| India                 |  | Bahru, Himachal Pradesh, IN              | IN9   | 1577.5           | 31.7318          | 76.7102           | 0.0562      | 0.25             | 0.0140                      | 1    3                 |
| India                 |  | Chamba HP, IN                            | IN10  | 1731.4           | 32.4392          | 76.0730           | 0.0661      | 0.25             | 0.0165                      | 1    3                 |
| India                 |  | Lad Bharol HP, IN                        | IN11  | 1577.5           | 31.9931          | 76.6059           | 0.0562      | 0.25             | 0.0140                      | 1    3                 |
| India                 |  | Latti, Jammu and Kashmir, IN             | IN12  | 1123.2           | 32.9708          | 75.4853           | 0.0757      | 0.17             | 0.0129                      | 1    2                 |
| India                 |  | Nar Sher Ali Khan, Jammu and Kashmir, IN | IN13  | 1307.3           | 33.9424          | 73.9637           | 0.0478      | 0.17             | 0.0081                      | 1    2                 |
| India                 |  | Bandipora, Jammu and Kashmir, IN         | IN14  | 2763.9           | 34.4739          | 74.8261           | 0.0000      | 0                | 0.0000                      | 0    0                 |
| India                 |  | Shimla, Himachal Pradesh, IN             | IN15  | 2606.1           | 31.2983          | 77.8315           | 0.1135      | 0.08             | 0.0091                      | 1    1                 |

| Region and<br>Country | Location                           | Code | Elevation<br>(m) | Latitude<br>(°N) | Longitude<br>(°E) | Pst         |                  |                             |               |       |
|-----------------------|------------------------------------|------|------------------|------------------|-------------------|-------------|------------------|-----------------------------|---------------|-------|
|                       |                                    |      |                  |                  |                   | MINF<br>(A) | Fav-month<br>(F) | Favourable index<br>(A x F) | Risk<br>score | Month |
| India                 | Rupal, Jammu and Kashmir, IN       | IN16 | 3709.5           | 35.2421          | 74.9037           | 0.0051      | 0.08             | 0.0004                      | 0             | 1     |
| India                 | Sankoo, Jammu and Kashmir, IN      | IN17 | 4017.7           | 34.2854          | 75.9144           | 0.0000      | 0                | 0.0000                      | 0             | 0     |
| India                 | Magh Batna, Jammu and Kashmir, IN  | IN18 | 2745.7           | 33.2442          | 75.6507           | 0.0000      | 0                | 0.0000                      | 0             | 0     |
| India                 | Khawaspur, Punjab, IN              | IN19 | 431.1            | 31.5018          | 75.9148           | 0.0337      | 0.08             | 0.0027                      | 0             | 1     |
| India                 | Dharm Manela, Himachal Pradesh, IN | IN20 | 4333.2           | 31.9359          | 78.3664           | 0.0403      | 0.08             | 0.0032                      | 0             | 1     |
| India                 | Jamaga, Karnataka, IN              | IN21 | 498.9            | 15.1369          | 74.6675           | 0.0131      | 0.25             | 0.0033                      | 0             | 3     |
| India                 | Waynad, Kerala, IN                 | IN22 | 718.3            | 11.5457          | 76.2055           | 0.1863      | 0.33             | 0.0615                      | 1             | 4     |
| India                 | Thanjavur, Tamil Nadu, IN          | IN23 | 51.8             | 10.8128          | 79.1059           | 0.0000      | 0                | 0.0000                      | 0             | 0     |
| India                 | Mendpal, Chhattisgarh, IN          | IN24 | 517.4            | 19.2915          | 81.0395           | 0.0013      | 0.08             | 0.0001                      | 0             | 1     |
| India                 | Basnara, Chhattisgarh, IN          | IN25 | 493.2            | 23.7059          | 82.7534           | 0.0026      | 0.08             | 0.0002                      | 0             | 1     |
| India                 | Adiwas, Rajasthan, IN              | IN26 | 385.2            | 24.3481          | 73.3491           | 0.0000      | 0                | 0.0000                      | 0             | 0     |
| India                 | Khesari Gidha, Uttar Pradesh, IN   | IN27 | 85.4             | 26.7662          | 83.9729           | 0.0000      | 0                | 0.0000                      | 0             | 0     |
| India                 | Nandhaur Range, Uttarakhand, IN    | IN28 | 864.4            | 29.0764          | 79.7871           | 0.0116      | 0.33             | 0.0038                      | 0             | 4     |
| India                 | Deema Range, Uttarakhand, IN       | IN29 | 891.5            | 29.5267          | 78.9082           | 0.0062      | 0.17             | 0.0011                      | 0             | 2     |
| India                 | Bahru, Himachal Pradesh, IN        | IN30 | 1577.5           | 31.9438          | 76.5351           | 0.0562      | 0.25             | 0.0140                      | 1             | 3     |
| India                 | Bahl, Himachal Pradesh, IN         | IN31 | 944.3            | 31.2889          | 76.6450           | 0.0318      | 0.08             | 0.0025                      | 0             | 1     |
| India                 | Golaghat, Assam, IN                | IN32 | 369.8            | 26.5895          | 93.6299           | 0.0100      | 0.25             | 0.0025                      | 0             | 3     |
| India                 | Mokokchung, Nagaland, IN           | IN33 | 668.8            | 26.2747          | 94.3769           | 0.0107      | 0.17             | 0.0018                      | 0             | 2     |
| India                 | Nagrasari, Rajasthan, IN           | IN34 | 230.2            | 28.9995          | 74.7773           | 0.0000      | 0                | 0.0000                      | 0             | 0     |
| India                 | Jind, Haryana, IN                  | IN35 | 224.2            | 29.3449          | 76.3594           | 0.0000      | 0                | 0.0000                      | 0             | 0     |
| India                 | Thirpali Chhoti, Rajasthan, IN     | IN36 | 312.1            | 28.4214          | 75.5244           | 0.0000      | 0                | 0.0000                      | 0             | 0     |
| India                 | Roranwala Urf Tarewali, Punjab     | IN37 | 186.3            | 30.4875          | 74.2939           | 0.0000      | 0                | 0.0000                      | 0             | 0     |
| India                 | Gulbarga, Karnataka, IN            | IN38 | 501.4            | 17.1996          | 77.2310           | 0.0000      | 0                | 0.0000                      | 0             | 0     |
| India                 | Poletipalle, Andhra Pradesh, IN    | IN39 | 507.9            | 14.2814          | 77.6704           | 0.0000      | 0                | 0.0000                      | 0             | 0     |
| India                 | Marma, Maharashtra, IN             | IN40 | 293.8            | 20.4435          | 80.4829           | 0.0000      | 0                | 0.0000                      | 0             | 0     |
| India                 | Kaimur, Bihar, IN                  | IN41 | 212.1            | 24.9422          | 83.6910           | 0.0000      | 0                | 0.0000                      | 0             | 0     |
| India                 | Karbi Anglog, Assam, IN            | IN42 | 272.5            | 26.2452          | 93.3772           | 0.0061      | 0.17             | 0.0010                      | 0             | 2     |
| India                 | Champai, Mizoram, IN               | IN43 | 955.7            | 23.4643          | 93.2453           | 0.0007      | 0.08             | 0.0001                      | 0             | 1     |
| India                 | Serchhip, Mizoram, IN              | IN44 | 600.9            | 23.2525          | 92.9597           | 0.0004      | 0.08             | 0.0000                      | 0             | 1     |

| Region and Country | Location                      | Code | Elevation (m) | Latitude (°N) | Longitude (°E) | Pst      |               |                          |            |       |
|--------------------|-------------------------------|------|---------------|---------------|----------------|----------|---------------|--------------------------|------------|-------|
|                    |                               |      |               |               |                | MINF (A) | Fav-month (F) | Favourable index (A x F) | Risk score | Month |
| India              | Baljata, J&K, IN              | IN45 | 695.6         | 32.7513       | 74.9641        | 0.0372   | 0.17          | 0.0063                   | 0          | 2     |
| Mongolia           | Unnamed, Lamaiin Huryee, MN   | MN1  | 1646.8        | 43.7402       | 103.2539       | 0.0000   | 0             | 0.0000                   | 0          | 0     |
| Mongolia           | Unnamed, Khurmen, MN          | MN2  | 1210.1        | 42.2619       | 103.4626       | 0.0000   | 0             | 0.0000                   | 0          | 0     |
| Mongolia           | Unnamed, Shinejinst, MN       | MN3  | 1208.9        | 43.8433       | 98.9033        | 0.0020   | 0.08          | 0.0002                   | 0          | 1     |
| Mongolia           | Unnamed, Munkhkhairkhan, MN   | MN4  | 2520.2        | 46.9285       | 91.6304        | 0.0011   | 0.08          | 0.0001                   | 0          | 1     |
| Mongolia           | Unnamed, Tsagaankhairkhan, MN | MN5  | 1225.3        | 48.8727       | 93.9155        | 0.0103   | 0.17          | 0.0017                   | 0          | 2     |
| Mongolia           | Unnamed, Orkhon, MN           | MN6  | 1337.4        | 48.6699       | 103.9790       | 0.0095   | 0.08          | 0.0008                   | 0          | 1     |
| Mongolia           | Unnamed, Dashbalbar, MN       | MN7  | 820.7         | 49.2470       | 114.4380       | 0.0033   | 0.08          | 0.0003                   | 0          | 1     |
| Mongolia           | Unnamed, Matad, MN            | MN8  | 736.1         | 46.8985       | 116.0639       | 0.0000   | 0             | 0.0000                   | 0          | 0     |
| Mongolia           | Unnamed, Luus, MN             | MN9  | 1307.8        | 45.2525       | 105.7805       | 0.0000   | 0             | 0.0000                   | 0          | 0     |
| Mongolia           | Unnamed, Khuvs gul, MN        | MN10 | 950.7         | 43.6210       | 109.9116       | 0.0000   | 0             | 0.0000                   | 0          | 0     |
| Myanmar            | Sagaing Region 1, Mym         | MYN1 | 344.5         | 24.6805       | 95.8436        | 0.0000   | 0             | 0.0000                   | 0          | 0     |
| Myanmar            | Kyaukme, Mym                  | MYN2 | 950.9         | 22.7494       | 97.5575        | 0.0000   | 0             | 0.0000                   | 0          | 0     |
| Myanmar            | Mindat, Mym                   | MYN3 | 932.5         | 21.4439       | 93.5749        | 0.0000   | 0             | 0.0000                   | 0          | 0     |
| Myanmar            | Kyaukpyu, Mym                 | MYN4 | 315.1         | 19.7264       | 94.1682        | 0.0000   | 0             | 0.0000                   | 0          | 0     |
| Myanmar            | Rakhine, Mym                  | MYN5 | 42.4          | 17.4041       | 94.7615        | 0.0000   | 0             | 0.0000                   | 0          | 0     |
| Myanmar            | Putao 1, Mym                  | MYN6 | 924.5         | 26.5994       | 97.4421        | 0.0121   | 0.25          | 0.0030                   | 0          | 3     |
| Myanmar            | Bhamo, Mym                    | MYN7 | 606.2         | 24.4182       | 97.0027        | 0.0000   | 0             | 0.0000                   | 0          | 0     |
| Myanmar            | Sagaing Region 2, Mym         | MYN8 | 299.1         | 21.9950       | 94.8933        | 0.0000   | 0             | 0.0000                   | 0          | 0     |
| Nepal              | Guthichaur, NP                | NP1  | 3284.5        | 29.1382       | 82.3183        | 0.1301   | 0.17          | 0.0221                   | 1          | 2     |
| Nepal              | Namarjung, NP                 | NP2  | 2339.8        | 28.4305       | 84.2354        | 0.2502   | 0.25          | 0.0626                   | 1          | 3     |
| Nepal              | Maipokhari, NP                | NP3  | 2076.8        | 27.0210       | 87.8950        | 0.1539   | 0.17          | 0.0262                   | 1          | 2     |
| Nepal              | Seti, NP                      | NP4  | 1877.7        | 29.4053       | 81.0641        | 0.0815   | 0.17          | 0.0138                   | 1          | 2     |
| Nepal              | Phopli 1, NP                  | NP5  | 1618.9        | 28.2086       | 82.8523        | 0.1004   | 0.25          | 0.0251                   | 1          | 3     |
| Nepal              | Phopli 2, NP                  | NP6  | 1116.5        | 29.0152       | 80.3625        | 0.0450   | 0.33          | 0.0148                   | 1          | 4     |
| Nepal              | Kailali, NP                   | NP7  | 601.5         | 28.9239       | 80.5225        | 0.0030   | 0.08          | 0.0002                   | 0          | 1     |
| Nepal              | Bheri, NP                     | NP8  | 630.9         | 28.4435       | 81.5676        | 0.0000   | 0             | 0.0000                   | 0          | 0     |
| Nepal              | Chitwan, NP                   | NP9  | 1142.1        | 27.7651       | 84.5600        | 0.0732   | 0.33          | 0.0242                   | 1          | 4     |
| Nepal              | Firfire, NP                   | NP10 | 2136.2        | 28.0855       | 83.9832        | 0.2038   | 0.25          | 0.0510                   | 1          | 3     |

|                                          |                                    |       |               |               |                | Pst      |               |                          |            |       |
|------------------------------------------|------------------------------------|-------|---------------|---------------|----------------|----------|---------------|--------------------------|------------|-------|
| Region and Country                       | Location                           | Code  | Elevation (m) | Latitude (°N) | Longitude (°E) | MINF (A) | Fav-month (F) | Favourable index (A x F) | Risk score | Month |
| Nepal                                    | Huktumba, NP                       | NP11  | 706.1         | 27.8963       | 83.3130        | 0.0126   | 0.08          | 0.0010                   | 0          | 1     |
| Nepal                                    | Khalanga, NP                       | NP12  | 630.9         | 28.4214       | 81.9025        | 0.0005   | 0.08          | 0.0000                   | 0          | 1     |
| Nepal                                    | Tilepata, NP                       | NP13  | 2451.5        | 29.0476       | 81.5010        | 0.1199   | 0.17          | 0.0204                   | 1          | 2     |
| Nepal                                    | Khalanga NP                        | NP14  | 630.9         | 28.4214       | 81.9075        | 0.0000   | 0             | 0.0000                   | 0          | 0     |
| Nepal                                    | Malatikot NP                       | NP15  | 2451.5        | 29.0476       | 81.5010        | 0.0937   | 0.17          | 0.0159                   | 1          | 2     |
| Pakistan                                 | Baricot, Khyber Pakhtunkhwa, PK    | PK1   | 1457.6        | 34.7064       | 72.2834        | 0.0992   | 0.17          | 0.0169                   | 1          | 2     |
| Pakistan                                 | Abbottabad, Khyber Pakhtunkhwa, PK | PK2   | 1418.5        | 34.2173       | 73.2722        | 0.0722   | 0.17          | 0.0123                   | 1          | 2     |
| Pakistan                                 | Jand, Punjab, PK                   | PK3   | 460.3         | 33.6339       | 72.1955        | 0.0296   | 0.17          | 0.0050                   | 0          | 2     |
| Pakistan                                 | Darsmand, Khyber Pakhtunkhwa, PK   | PK4   | 896.8         | 33.4140       | 70.6575        | 0.0546   | 0.17          | 0.0093                   | 1          | 2     |
| Pakistan                                 | Wana 1, Waziristan, PK             | PK5   | 754.7         | 31.9531       | 70.1081        | 0.0118   | 0.17          | 0.0020                   | 0          | 2     |
| Pakistan                                 | Qila Saifullah, Balochistan, PK    | PK6   | 1916.1        | 30.7145       | 68.3723        | 0.0036   | 0.08          | 0.0003                   | 0          | 1     |
| Pakistan                                 | Wana 2, Waziristan, PK             | PK7   | 1346.1        | 32.3809       | 69.6247        | 0.0200   | 0.17          | 0.0034                   | 0          | 2     |
| Pakistan                                 | Awaran 1, Balochistan, PK          | PK8   | 347.2         | 25.7811       | 64.9006        | 0.0000   | 0             | 0.0000                   | 0          | 0     |
| Pakistan                                 | Khuzdar, Balochistan, PK           | PK9   | 1419.9        | 28.0730       | 66.6804        | 0.0000   | 0             | 0.0000                   | 0          | 0     |
| Pakistan                                 | Sangan, Balochistan, PK            | PK10  | 913.3         | 29.9369       | 67.7351        | 0.0029   | 0.08          | 0.0002                   | 0          | 1     |
| Pakistan                                 | Kalkot, Khyber Pakhtunkhwa, PK     | PK11  | 2661.5        | 35.3721       | 72.1736        | 0.0065   | 0.08          | 0.0005                   | 0          | 1     |
| Pakistan                                 | Awaran 2, Balochistan, PK          | PK12  | 714.4         | 26.0775       | 64.9919        | 0.0000   | 0             | 0.0000                   | 0          | 0     |
| Pakistan                                 | Mastuj, Khyber Pakhtunkhwa, PK     | PK13  | 3641.5        | 35.8677       | 72.2889        | 0.0000   | 0             | 0.0000                   | 0          | 0     |
| Pakistan                                 | Hunza Nagar, PK                    | PK14  | 4536.9        | 36.2053       | 75.1893        | 0.0000   | 0             | 0.0000                   | 0          | 0     |
| Pakistan                                 | Alai, Khyber Pakhtunkhwa, PK       | PK15  | 2219.3        | 34.8823       | 73.1019        | 0.0000   | 0             | 0.0000                   | 0          | 0     |
| Pakistan                                 | Bara, Khyber Agency, PK            | PK16  | 1322.9        | 33.7755       | 70.8168        | 0.0712   | 0.17          | 0.0121                   | 1          | 2     |
| Proportion of sites with infection index |                                    | 0.756 |               |               |                |          |               |                          |            |       |
| Central Asia (195)                       |                                    |       |               |               |                |          |               |                          |            |       |
| Afghanistan                              | Khas Uruzgan, AFG                  | AFG1  | 2155.9        | 32.9036       | 66.4881        | 0.0000   | 0             | 0.0000                   | 0          | 0     |
| Afghanistan                              | Berana, Panjab, AFG                | AFG2  | 3161.5        | 34.4531       | 67.2187        | 0.0000   | 0             | 0.0000                   | 0          | 0     |
| Afghanistan                              | Kohistan, AFG                      | AFG3  | 2240.4        | 35.3989       | 64.8347        | 0.0000   | 0             | 0.0000                   | 0          | 0     |
| Afghanistan                              | Balkh, AFG                         | AFG4  | 1416.8        | 36.3470       | 67.0375        | 0.0057   | 0.25          | 0.0014                   | 0          | 3     |
| Afghanistan                              | Warsaj, AFG                        | AFG5  | 3346.1        | 36.2939       | 70.2455        | 0.0051   | 0.08          | 0.0004                   | 0          | 1     |

| Region and Country | Location                     | Code  | Elevation (m) | Latitude (°N) | Longitude (°E) | Pst      |               |                          |            |       |
|--------------------|------------------------------|-------|---------------|---------------|----------------|----------|---------------|--------------------------|------------|-------|
|                    |                              |       |               |               |                | MINF (A) | Fav-month (F) | Favourable index (A x F) | Risk score | Month |
| Afghanistan        | Alingar 1, AFG               | AFG6  | 1771.3        | 34.8643       | 70.5970        | 0.0382   | 0.33          | 0.0126                   | 1          | 4     |
| Afghanistan        | Pur Chaman, AFG              | AFG7  | 1906.7        | 32.8298       | 64.0272        | 0.0015   | 0.08          | 0.0001                   | 0          | 1     |
| Afghanistan        | Alingar 2, AFG               | AFG8  | 2061.5        | 34.7245       | 70.3498        | 0.0000   | 0             | 0.0000                   | 0          | 0     |
| Afghanistan        | Sabari, AFG                  | AFG9  | 1903.8        | 33.4690       | 69.9983        | 0.0082   | 0.17          | 0.0014                   | 0          | 2     |
| Afghanistan        | Bargi Matal, AFG             | AFG10 | 3682.4        | 35.6582       | 71.0530        | 0.0000   | 0             | 0.0000                   | 0          | 0     |
| Afghanistan        | Panjwai, AFG                 | AFG11 | 1083.6        | 31.3171       | 65.3181        | 0.0000   | 0             | 0.0000                   | 0          | 0     |
| Afghanistan        | Taywara, AFG                 | AFG12 | 2370.5        | 33.3957       | 64.1535        | 0.0000   | 0             | 0.0000                   | 0          | 0     |
| Afghanistan        | Sayyad, AFG                  | AFG13 | 1103.6        | 36.0855       | 66.0432        | 0.0064   | 0.17          | 0.0011                   | 0          | 2     |
| Afghanistan        | Bangi, AFG                   | AFG14 | 1641.3        | 36.5469       | 69.5368        | 0.0156   | 0.25          | 0.0039                   | 0          | 3     |
| Afghanistan        | Zinda Jan, AFG               | AFG15 | 1012.4        | 34.6703       | 61.8684        | 0.0006   | 0.08          | 0.0001                   | 0          | 1     |
| Afghanistan        | Khamyab, AFG                 | AFG16 | 302.8         | 37.3361       | 65.8894        | 0.0098   | 0.25          | 0.0025                   | 0          | 3     |
| Afghanistan        | Baghran, AFG                 | AFG17 | 2147.4        | 33.2121       | 65.0544        | 0.0000   | 0             | 0.0000                   | 0          | 0     |
| Afghanistan        | Chihil Baghtoe Pashi, AFG    | AFG18 | 2885.7        | 33.0833       | 67.2077        | 0.0000   | 0             | 0.0000                   | 0          | 0     |
| Afghanistan        | Saghar, AFG                  | AFG19 | 2355.2        | 33.5469       | 63.5054        | 0.0000   | 0             | 0.0000                   | 0          | 0     |
| Afghanistan        | Khidir, AFG                  | AFG20 | 2580.1        | 33.7298       | 65.4939        | 0.0000   | 0             | 0.0000                   | 0          | 0     |
| Azerbaijan         | Alekseyevka, Khasmaz, AZ     | AZ1   | 70.9          | 41.5036       | 48.6896        | 0.6328   | 0.83          | 0.5252                   | 3          | 10    |
| Azerbaijan         | Derk, Quba, AZ               | AZ2   | 1291.3        | 41.0412       | 48.3820        | 0.0149   | 0.17          | 0.0025                   | 0          | 2     |
| Azerbaijan         | Qaradagh, Baku, AZ           | AZ3   | 161.1         | 40.3247       | 49.4916        | 0.1921   | 0.5           | 0.0961                   | 1          | 6     |
| Azerbaijan         | Burkandul, Lerik, AZ         | AZ4   | 461.7         | 38.8431       | 48.5468        | 0.3390   | 0.67          | 0.2271                   | 2          | 8     |
| Azerbaijan         | Hasanabad, Neftchala, AZ     | AZ5   | -3.6          | 39.3546       | 49.1730        | 0.9570   | 0.83          | 0.7943                   | 4          | 10    |
| Azerbaijan         | Kurdchu, Hajiqabul, AZ       | AZ6   | 1.2           | 39.9215       | 49.2279        | 0.3589   | 0.67          | 0.2405                   | 2          | 8     |
| Azerbaijan         | Malikumudlu, Ujar, AZ        | AZ7   | 90.9          | 40.3331       | 47.7668        | 0.0511   | 0.17          | 0.0087                   | 1          | 2     |
| Azerbaijan         | Nagorno-Karabakh, AZ         | AZ8   | 790.1         | 40.0730       | 46.5802        | 0.0220   | 0.25          | 0.0055                   | 0          | 3     |
| Azerbaijan         | Alxanlı, Fizuli, AZ          | AZ9   | 409.2         | 39.6682       | 47.3493        | 0.0457   | 0.33          | 0.0151                   | 1          | 4     |
| Azerbaijan         | Sarica, Shaki, AZ            | AZ10  | 426.9         | 40.9168       | 47.3273        | 0.0602   | 0.33          | 0.0199                   | 1          | 4     |
| Azerbaijan         | Qinli, Ağstafa, AZ           | AZ11  | 567.3         | 41.1157       | 45.5695        | 0.0597   | 0.42          | 0.0251                   | 1          | 5     |
| Azerbaijan         | Damchili, Goygol, AZ         | AZ12  | 823.8         | 40.6172       | 46.2177        | 0.0314   | 0.33          | 0.0104                   | 1          | 4     |
| Azerbaijan         | Istisu, Nagorno-Karabakh, AZ | AZ13  | 2067.1        | 39.8793       | 45.9320        | 0.0000   | 0             | 0.0000                   | 0          | 0     |
| Azerbaijan         | Dizavar, Khizi, AZ           | AZ14  | 289.5         | 40.8575       | 49.1953        | 0.2393   | 0.58          | 0.1388                   | 2          | 7     |

| Region and Country |  | Location                        | Code  | Elevation (m) | Latitude (°N) | Longitude (°E) | Pst      |               |                          |                  |
|--------------------|--|---------------------------------|-------|---------------|---------------|----------------|----------|---------------|--------------------------|------------------|
|                    |  |                                 |       |               |               |                | MINF (A) | Fav-month (F) | Favourable index (A x F) | Risk score Month |
| Azerbaijan         |  | Khinaliq, Qusar, AZ             | AZ15  | 1291.3        | 41.2291       | 48.0146        | 0.0149   | 0.17          | 0.0025                   | 0 2              |
| Azerbaijan         |  | Solguja, Oghuz, AZ              | AZ16  | 1526.9        | 41.0732       | 47.6462        | 0.0149   | 0.17          | 0.0025                   | 0 2              |
| Iran               |  | Ahar, East Azerbaijan, IRN      | IRN1  | 1361.2        | 38.6521       | 47.0368        | 0.0000   | 0             | 0.0000                   | 0 0              |
| Iran               |  | Tang-e-Panj, Khuzestan, IRN     | IRN2  | 989.6         | 32.9543       | 48.6625        | 0.0134   | 0.17          | 0.0023                   | 0 2              |
| Iran               |  | Aghowz Darban, Mazandaran, IRN  | IRN3  | 1997.9        | 36.4575       | 51.2117        | 0.0231   | 0.25          | 0.0058                   | 0 3              |
| Iran               |  | Hakan, Fars, IRN                | IRN4  | 1420.5        | 28.6530       | 53.2771        | 0.0000   | 0             | 0.0000                   | 0 0              |
| Iran               |  | Far-Ashian, North Khorasan, IRN | IRN5  | 1180.9        | 36.7750       | 56.8367        | 0.0000   | 0             | 0.0000                   | 0 0              |
| Iran               |  | Ferdows, South Khorasan, IRN    | IRN6  | 1186.8        | 33.9807       | 57.9813        | 0.0800   | 0.5           | 0.0400                   | 1 6              |
| Iran               |  | Gale Koor, Lorestan, IRN        | IRN7  | 1555.3        | 32.8720       | 49.2840        | 0.0000   | 0             | 0.0000                   | 0 0              |
| Iran               |  | Tabriz, East Azerbaijan, IRN    | IRN8  | 1562.5        | 38.1117       | 45.9190        | 0.0211   | 0.17          | 0.0036                   | 0 2              |
| Iran               |  | Basak, Gilan, IRN               | IRN9  | 1263.7        | 37.8692       | 48.7754        | 0.1121   | 0.5           | 0.0560                   | 1 6              |
| Iran               |  | Arab Lang, Kurdistan, IRN       | IRN10 | 1674.5        | 36.0789       | 46.2266        | 0.0037   | 0.08          | 0.0003                   | 0 1              |
| Iran               |  | West Azerbaijan, IRN            | IRN11 | 1872.8        | 38.0079       | 44.6446        | 0.0011   | 0.08          | 0.0001                   | 0 1              |
| Iran               |  | Bilesavar, Ardabil, IRN         | IRN12 | 587.1         | 39.2778       | 47.8965        | 0.0339   | 0.33          | 0.0112                   | 1 4              |
| Iran               |  | Kharfegil, Gilan, IRN           | IRN13 | 1263.7        | 37.6956       | 48.9073        | 0.1121   | 0.5           | 0.0560                   | 1 6              |
| Iran               |  | Charoymaq, East Azerbaijan, IRN | IRN14 | 1767.6        | 37.2771       | 47.1495        | 0.0000   | 0             | 0.0000                   | 0 0              |
| Iran               |  | Kafteroud, Gilan, IRN           | IRN15 | 451.9         | 37.3470       | 49.5226        | 0.4981   | 0.75          | 0.3736                   | 3 9              |
| Iran               |  | Gadel, Zanjan, IRN              | IRN16 | 1773.4        | 36.6098       | 47.9405        | 0.0000   | 0             | 0.0000                   | 0 0              |
| Iran               |  | Roudbar Alamout, Qazvin, IRN    | IRN17 | 1247.7        | 36.5745       | 50.0498        | 0.0748   | 0.5           | 0.0374                   | 1 6              |
| Iran               |  | Tamisan, Tehran, IRN            | IRN18 | 1912.7        | 35.5801       | 51.9834        | 0.0078   | 0.17          | 0.0013                   | 0 2              |
| Iran               |  | Qarehtappeh, Mazandaran, IRN    | IRN19 | 228.1         | 36.7508       | 53.4336        | 0.3610   | 0.75          | 0.2708                   | 2 9              |
| Iran               |  | Narlidaq, Golestan, IRN         | IRN20 | 203.9         | 37.6956       | 55.2793        | 0.0927   | 0.5           | 0.0463                   | 1 6              |
| Iran               |  | Shirvan, North Khorasan, IRN    | IRN21 | 1261.9        | 37.5215       | 57.8721        | 0.0081   | 0.17          | 0.0014                   | 0 2              |
| Iran               |  | Mozduran, Razavi Khorasan, IRN  | IRN22 | 682.3         | 36.0789       | 60.5528        | 0.0229   | 0.17          | 0.0039                   | 0 2              |
| Iran               |  | Shahrud, Semnan, IRN            | IRN23 | 996.5         | 35.9723       | 56.5538        | 0.0000   | 0             | 0.0000                   | 0 0              |
| Iran               |  | Abadan, Khuzestan, IRN          | IRN24 | 2.5           | 30.3478       | 48.6436        | 0.0000   | 0             | 0.0000                   | 0 0              |
| Iran               |  | Anjiru, Bushehr, IRN            | IRN25 | 113.3         | 29.4334       | 50.7530        | 0.1163   | 0.33          | 0.0384                   | 1 4              |
| Iran               |  | Abdan, Bushehr, IRN             | IRN26 | 125.1         | 27.9687       | 51.7198        | 0.0324   | 0.25          | 0.0081                   | 1 3              |
| Iran               |  | Garisheh, Hormozgan, IRN        | IRN27 | 217.3         | 26.9157       | 53.7413        | 0.0000   | 0             | 0.0000                   | 0 0              |

| Region and<br>Country | Location                           | Code  | Elevation<br>(m) | Latitude<br>(°N) | Longitude<br>(°E) | Pst         |                  |                             |               |       |
|-----------------------|------------------------------------|-------|------------------|------------------|-------------------|-------------|------------------|-----------------------------|---------------|-------|
|                       |                                    |       |                  |                  |                   | MINF<br>(A) | Fav-month<br>(F) | Favourable index<br>(A x F) | Risk<br>score | Month |
| Iran                  | Tifakan, Hormozgan, IRN            | IRN28 | 795.5            | 27.6967          | 56.2901           | 0.0000      | 0                | 0.0000                      | 0             | 0     |
| Iran                  | Kasi, Sistan and Balochistan, IRN  | IRN29 | 159.1            | 25.7341          | 59.1026           | 0.0000      | 0                | 0.0000                      | 0             | 0     |
| Iran                  | Khash, Sistan and Balochistan, IRN | IRN30 | 1293.8           | 28.0851          | 61.7393           | 0.0000      | 0                | 0.0000                      | 0             | 0     |
| Iran                  | Zarand, Kerman, IRN                | IRN31 | 1788.7           | 30.7263          | 56.3780           | 0.0000      | 0                | 0.0000                      | 0             | 0     |
| Iran                  | Reza Abad, Fars, IRN               | IRN32 | 2109.6           | 30.4236          | 52.6426           | 0.0029      | 0.08             | 0.0002                      | 0             | 1     |
| Iran                  | Sirusabad, Yazd, IRN               | IRN33 | 1461.3           | 31.6660          | 55.8506           | 0.0000      | 0                | 0.0000                      | 0             | 0     |
| Iran                  | Kashan County, Isfahan, IRN        | IRN34 | 1863.2           | 33.7001          | 51.2364           | 0.0000      | 0                | 0.0000                      | 0             | 0     |
| Iran                  | Jera, Hamadan, IRN                 | IRN35 | 1869.8           | 34.4282          | 48.2920           | 0.0064      | 0.08             | 0.0005                      | 0             | 1     |
| Iran                  | Cheshme, Markazi, IRN              | IRN36 | 1774.3           | 34.2831          | 50.1817           | 0.0000      | 0                | 0.0000                      | 0             | 0     |
| Iran                  | Mahdishahr, Semnan, IRN            | IRN37 | 1526.6           | 35.7586          | 53.5215           | 0.0011      | 0.08             | 0.0001                      | 0             | 1     |
| Iran                  | Shahrud 2, Semnan, IRN             | IRN38 | 812.5            | 35.0781          | 55.5870           | 0.0024      | 0.08             | 0.0002                      | 0             | 1     |
| Iran                  | Dehrud, Fars, IRN                  | IRN39 | 1336.8           | 28.5759          | 52.5225           | 0.0000      | 0                | 0.0000                      | 0             | 0     |
| Iran                  | Urmia, West Azerbaijan, IRN        | IRN40 | 1888.9           | 37.7890          | 44.7441           | 0.0132      | 0.17             | 0.0022                      | 0             | 2     |
| Iran                  | Chalus, Mazandaran, IRN            | IRN41 | 819.2            | 36.5825          | 51.4475           | 0.6182      | 0.83             | 0.5131                      | 3             | 10    |
| Iran                  | Pourva, Mazandaran, IRN            | IRN42 | 228.1            | 36.5296          | 53.4800           | 0.3610      | 0.75             | 0.2708                      | 2             | 9     |
| Iran                  | Lulak-E Lebur, Mazandaran, IRN     | IRN43 | 1110.9           | 36.2820          | 53.0735           | 0.0498      | 0.42             | 0.0209                      | 1             | 5     |
| Iran                  | Pust Kola, Mazandaran, IRN         | IRN44 | 1168.4           | 36.2909          | 52.6560           | 0.0800      | 0.5              | 0.0400                      | 1             | 6     |
| Iran                  | Manuchehrkela, Mazandaran, IRN     | IRN45 | 508.3            | 36.5031          | 51.8760           | 0.9217      | 0.83             | 0.7650                      | 4             | 10    |
| Iran                  | Shalma Shaft, Gilan, IRN           | IRN46 | 692.2            | 37.1013          | 49.2942           | 0.2967      | 0.75             | 0.2225                      | 2             | 9     |
| Iran                  | Askabon, Gilan, IRN                | IRN47 | 1202.6           | 36.6443          | 49.7446           | 0.0459      | 0.42             | 0.0193                      | 1             | 5     |
| Iran                  | GolRoudbar, Gilan, IRN             | IRN48 | 451.9            | 37.1451          | 49.9534           | 0.4981      | 0.75             | 0.3736                      | 3             | 9     |
| Iran                  | Harandan, Gilan, IRN               | IRN49 | 925.4            | 38.1368          | 48.8438           | 0.2073      | 0.67             | 0.1389                      | 2             | 8     |
| Iran                  | Rudakanar, Masally, AZ             | IRN50 | 461.7            | 38.8847          | 48.6790           | 0.3390      | 0.67             | 0.2271                      | 2             | 8     |
| Iran                  | Shaft, Gilan, IRN                  | IRN51 | 692.2            | 37.0421          | 49.4178           | 0.2967      | 0.75             | 0.2225                      | 2             | 9     |
| Iran                  | Shiveh Berow, West Azerbaijan, IRN | IRN52 | 1646.2           | 37.1648          | 45.0562           | 0.0267      | 0.25             | 0.0067                      | 0             | 3     |
| Iran                  | Akhond Mahalleh, Mazandaran, IRN   | IRN53 | 1152.9           | 36.7786          | 50.8131           | 0.2804      | 0.83             | 0.2328                      | 2             | 10    |
| Iran                  | Chanasak, Qazvin, IRN              | IRN54 | 1617.6           | 36.2842          | 50.3516           | 0.0037      | 0.08             | 0.0003                      | 0             | 1     |
| Iran                  | Kuchek Khortum, Golestan, IRN      | IRN55 | 322.6            | 37.1122          | 54.9439           | 0.0921      | 0.5              | 0.0460                      | 1             | 6     |
| Iran                  | Viva, Golestan, IRN                | IRN56 | 556.3            | 36.6376          | 53.9551           | 0.2426      | 0.67             | 0.1626                      | 2             | 8     |

| Region and Country | Location                         | Code  | Elevation (m) | Latitude (°N) | Longitude (°E) | Pst      |               |                          |            |       |
|--------------------|----------------------------------|-------|---------------|---------------|----------------|----------|---------------|--------------------------|------------|-------|
|                    |                                  |       |               |               |                | MINF (A) | Fav-month (F) | Favourable index (A x F) | Risk score | Month |
| Iran               | Paeen Ahmad, Mazandaran, IRN     | IRN57 | 171.2         | 36.5318       | 52.5269        | 0.5580   | 0.75          | 0.4185                   | 3          | 9     |
| Iran               | Zirab, Mazandaran, IRN           | IRN58 | 1168.4        | 36.2311       | 52.9444        | 0.0000   | 0             | 0.0000                   | 0          | 0     |
| Kazakhstan         | Aksu, Karakiya, KZ               | KZ1   | 82.1          | 43.2940       | 52.2334        | 0.0010   | 0.08          | 0.0001                   | 0          | 1     |
| Kazakhstan         | Karakum, Tupkaragan, KZ          | KZ2   | 21.9          | 44.4032       | 50.6513        | 0.2672   | 0.58          | 0.1550                   | 2          | 7     |
| Kazakhstan         | Unnamed 2, Karakiya, KZ          | KZ3   | 184.9         | 43.8670       | 54.4306        | 0.0000   | 0             | 0.0000                   | 0          | 0     |
| Kazakhstan         | Unnamed, Karakum, Tupkaragan, KZ | KZ4   | -24.1         | 45.2138       | 51.7500        | 0.0802   | 0.5           | 0.0401                   | 1          | 6     |
| Kazakhstan         | Unnamed, Isatay, KZ              | KZ5   | -21.7         | 46.4083       | 53.5517        | 0.0000   | 0             | 0.0000                   | 0          | 0     |
| Kazakhstan         | Kulandy, Aral, KZ                | KZ6   | 96.1          | 46.1350       | 59.3965        | 0.0276   | 0.25          | 0.0069                   | 0          | 3     |
| Kazakhstan         | Bis-Bulyuk, Makat, KZ            | KZ7   | -22           | 47.3098       | 53.2441        | 0.0064   | 0.08          | 0.0005                   | 0          | 1     |
| Kazakhstan         | Kimer-Sayek-Kul', Syrym, KZ      | KZ8   | 20.8          | 50.4022       | 51.8818        | 0.0432   | 0.33          | 0.0143                   | 1          | 4     |
| Kazakhstan         | Akhol, Ayteke Bi, KZ             | KZ9   | 264.6         | 50.0085       | 60.5830        | 0.0420   | 0.17          | 0.0071                   | 0          | 2     |
| Kazakhstan         | Aiyrtau, Airtau, KZ              | KZ10  | 298.8         | 53.1211       | 68.3613        | 0.1355   | 0.42          | 0.0569                   | 1          | 5     |
| Kazakhstan         | L'vovka, Kashyr, KZ              | KZ11  | 102.5         | 53.2527       | 76.4472        | 0.0811   | 0.33          | 0.0268                   | 1          | 4     |
| Kazakhstan         | Sartymbet, Ulan, KZ              | KZ12  | 469.3         | 49.6684       | 81.9844        | 0.0349   | 0.33          | 0.0115                   | 1          | 4     |
| Kazakhstan         | Unnamed, Bukhar-Zhyrau, KZ       | KZ13  | 729.3         | 49.4117       | 73.8105        | 0.0268   | 0.25          | 0.0067                   | 0          | 3     |
| Kazakhstan         | Unnamed, Nura, KZ                | KZ14  | 451.8         | 49.9237       | 67.5263        | 0.0490   | 0.25          | 0.0122                   | 1          | 3     |
| Kazakhstan         | Unnamed, South Kazakhstan, KZ    | KZ15  | 217.2         | 42.2944       | 67.7021        | 0.0098   | 0.08          | 0.0008                   | 0          | 1     |
| Kazakhstan         | Unnamed, Bayganin, KZ            | KZ16  | 346.2         | 46.1958       | 57.1289        | 0.0587   | 0.42          | 0.0247                   | 1          | 5     |
| Kazakhstan         | Goloschchekin, Atyrau, KZ        | KZ17  | -23.7         | 46.5022       | 49.2310        | 0.0185   | 0.25          | 0.0046                   | 0          | 3     |
| Kazakhstan         | Unnamed, Atyrau, KZ              | KZ18  | -18.1         | 47.7105       | 52.5025        | 0.0250   | 0.17          | 0.0043                   | 0          | 2     |
| Kyrgyzstan         | Issyk-Kul, KGN                   | KGN1  | 2135.8        | 42.6611       | 76.4720        | 0.0276   | 0.17          | 0.0047                   | 0          | 2     |
| Kyrgyzstan         | Temir-Kanat, Tong, KGN           | KGN2  | 2466.9        | 42.0359       | 76.9224        | 0.0600   | 0.25          | 0.0150                   | 1          | 3     |
| Kyrgyzstan         | Ak-Su 1, KGN                     | KGN3  | 3217.1        | 42.4020       | 78.9988        | 0.0000   | 0             | 0.0000                   | 0          | 0     |
| Kyrgyzstan         | Naryn, At-Bashi, KGN             | KGN4  | 3383.3        | 40.9496       | 75.7798        | 0.0000   | 0             | 0.0000                   | 0          | 0     |
| Kyrgyzstan         | Lyangar, Kadamzhai, KGN          | KGN5  | 2798.9        | 39.7440       | 71.9456        | 0.0000   | 0             | 0.0000                   | 0          | 0     |
| Kyrgyzstan         | Uzak, Aravan, KGN                | KGN6  | 2162.3        | 40.3662       | 72.7586        | 0.0417   | 0.33          | 0.0138                   | 1          | 4     |
| Kyrgyzstan         | Terek, Ak-Talaa, KGN             | KGN7  | 2676.5        | 41.1981       | 74.9119        | 0.0012   | 0.08          | 0.0001                   | 0          | 1     |
| Kyrgyzstan         | Karabashat 1, Aksy, KGN          | KGN8  | 2140.5        | 41.7250       | 71.7478        | 0.0000   | 0             | 0.0000                   | 0          | 0     |
| Kyrgyzstan         | Ak-Su 2, KGN                     | KGN9  | 3383.9        | 42.0685       | 79.6580        | 0.0036   | 0.17          | 0.0006                   | 0          | 2     |

| Region and Country | Location                                | Code  | Elevation (m) | Latitude (°N) | Longitude (°E) | Pst      |               |                          |            |       |
|--------------------|-----------------------------------------|-------|---------------|---------------|----------------|----------|---------------|--------------------------|------------|-------|
|                    |                                         |       |               |               |                | MINF (A) | Fav-month (F) | Favourable index (A x F) | Risk score | Month |
| Kyrgyzstan         | Konduk, Kara-Kulja, KGN                 | KGN10 | 2845.5        | 40.5648       | 74.0303        | 0.0000   | 0             | 0.0000                   | 0          | 0     |
| Kyrgyzstan         | Karabashat 2, Aksy, KGN                 | KGN11 | 2140.5        | 41.7230       | 71.7231        | 0.0000   | 0             | 0.0000                   | 0          | 0     |
| Kyrgyzstan         | Panfilov, KGN                           | KGN12 | 2698.5        | 42.2944       | 74.6675        | 0.0036   | 0.17          | 0.0006                   | 0          | 2     |
| Kyrgyzstan         | Chot-Nura, Naryn, KGN                   | KGN13 | 2861.1        | 41.6738       | 76.3374        | 0.0000   | 0             | 0.0000                   | 0          | 0     |
| Kyrgyzstan         | Issyk-kul region, KGN                   | KGN14 | 2672.9        | 42.2972       | 79.4640        | 0.0000   | 0             | 0.0000                   | 0          | 0     |
| Russia             | Rebrikhinsky, Altai Krai, RS            | RS1   | 197.4         | 53.2790       | 82.3359        | 0.0839   | 0.33          | 0.0277                   | 1          | 4     |
| Russia             | Miguty, Krasnodor Krai, RS              | RS2   | 32.9          | 46.1350       | 39.0937        | 0.0772   | 0.33          | 0.0255                   | 1          | 4     |
| Russia             | Indyuk, Krasnodor Krai, RS              | RS3   | 312.4         | 44.2617       | 39.2036        | 0.5044   | 0.75          | 0.3783                   | 3          | 9     |
| Russia             | Rassvet, Volgograd Oblast, RS           | RS4   | 78.7          | 47.5180       | 43.3125        | 0.0654   | 0.33          | 0.0216                   | 1          | 4     |
| Russia             | Tyurinsky, Volgograd Oblast, RS         | RS5   | 118.2         | 50.0508       | 42.6094        | 0.0518   | 0.33          | 0.0171                   | 1          | 4     |
| Russia             | Sadovyy, Volgograd Oblast, RS           | RS6   | 19.8          | 49.4689       | 46.6094        | 0.0590   | 0.25          | 0.0147                   | 1          | 3     |
| Russia             | Grabovskiy, Rostov Oblast, RS           | RS7   | 94.9          | 46.7858       | 43.2466        | 0.0458   | 0.33          | 0.0151                   | 1          | 4     |
| Russia             | Nogaysky, Dagestan Republic, RS         | RS8   | -12.1         | 44.5286       | 46.1689        | 0.0188   | 0.08          | 0.0015                   | 0          | 1     |
| Russia             | Verkh Karanay, Dagestan Reoublic, RS    | RS9   | 1152.5        | 42.8607       | 46.8281        | 0.0547   | 0.33          | 0.0181                   | 1          | 4     |
| Russia             | Novourupskiy, Krasnodar Krai, RS        | RS10  | 746.8         | 44.3718       | 41.5766        | 0.0888   | 0.5           | 0.0444                   | 1          | 6     |
| Russia             | Indyuk, Krasnodor Krai, RS              | RS11  | 312.4         | 44.2303       | 39.3135        | 0.5044   | 0.75          | 0.3783                   | 3          | 9     |
| Russia             | Kiziltashskiy Liman, Krasnodar Krai, RS | RS12  | 24.5          | 45.1518       | 37.0283        | 0.7599   | 0.67          | 0.5091                   | 3          | 8     |
| Russia             | Oktyabr'skiy, Krasnodar Krai, RS        | RS13  | 7.3           | 46.4840       | 38.2368        | 0.3181   | 0.67          | 0.2131                   | 2          | 8     |
| Russia             | Sadovyy, Volgograd Oblast, RS           | RS14  | 112.5         | 48.0348       | 40.7197        | 0.0345   | 0.25          | 0.0086                   | 1          | 3     |
| Russia             | Grabovskiy, Rostov Oblast, RS           | RS15  | 701.6         | 54.7062       | 88.2905        | 0.2580   | 0.33          | 0.0851                   | 1          | 4     |
| Russia             | Nogaysky, Dagestan Republic, RS         | RS16  | 1393.6        | 55.9067       | 114.4819       | 0.0495   | 0.33          | 0.0163                   | 1          | 4     |
| Russia             | Verkh Karanay, Dagestan Reoublic, RS    | RS17  | 1157.1        | 55.7092       | 132.4116       | 0.1149   | 0.25          | 0.0287                   | 1          | 3     |
| Russia             | Novourupskiy, Krasnodar Krai, RS        | RS18  | 615.7         | 45.9901       | 135.5757       | 0.0631   | 0.33          | 0.0208                   | 1          | 4     |
| Russia             | Goytkh, Krasnodar Krai, RS              | RS19  | 393.9         | 55.7092       | 59.2866        | 0.2473   | 0.5           | 0.1236                   | 2          | 6     |
| Russia             | Volodarsky, Astrakhan Oblast, RS        | RS20  | -26.7         | 46.2730       | 48.7559        | 0.0480   | 0.42          | 0.0201                   | 1          | 5     |
| Russia             | Kalmykia, RS                            | RS21  | -6.9          | 46.6061       | 46.3828        | 0.0179   | 0.33          | 0.0059                   | 0          | 4     |
| Russia             | Grushevo, Astrakhan Oblast, RS          | RS22  | -25.3         | 46.0523       | 48.4840        | 0.0094   | 0.25          | 0.0024                   | 0          | 3     |
| Russia             | Khivsky, Dagestan, RS                   | RS23  | 699.9         | 41.7734       | 48.0088        | 0.1080   | 0.5           | 0.0540                   | 1          | 6     |
| Tajikistan         | Ardzhanak, Hisor, TJ                    | TJ1   | 2031.3        | 38.7207       | 68.5810        | 0.0043   | 0.08          | 0.0003                   | 0          | 1     |

| Region and Country | Location                           | Code  | Elevation (m) | Latitude (°N) | Longitude (°E) | Pst      |               |                          |            |       |
|--------------------|------------------------------------|-------|---------------|---------------|----------------|----------|---------------|--------------------------|------------|-------|
|                    |                                    |       |               |               |                | MINF (A) | Fav-month (F) | Favourable index (A x F) | Risk score | Month |
| Tajikistan         | Kaltashur, TJ                      | TJ2   | 798.6         | 37.8931       | 69.0534        | 0.0423   | 0.25          | 0.0106                   | 1          | 3     |
| Tajikistan         | Arabkhana, Shahrtuz, TJ            | TJ3   | 527.8         | 37.1875       | 68.0976        | 0.0206   | 0.33          | 0.0068                   | 0          | 4     |
| Tajikistan         | Unnamed, Gorno-Badakhshan, TJ      | TJ4   | 4356.1        | 37.9624       | 74.4148        | 0.0000   | 0             | 0.0000                   | 0          | 0     |
| Tajikistan         | Khamirabot, Ghafurov, TJ           | TJ5   | 1040.6        | 40.3976       | 69.6028        | 0.0267   | 0.33          | 0.0088                   | 1          | 4     |
| Tajikistan         | Karakendzha, Jirgato, TJ           | TJ6   | 3683.9        | 39.2331       | 71.6023        | 0.0000   | 0             | 0.0000                   | 0          | 0     |
| Tajikistan         | Shahrinav, Shakhrinaw, TJ          | TJ7   | 2177.9        | 38.5662       | 68.3284        | 0.0000   | 0             | 0.0000                   | 0          | 0     |
| Tajikistan         | Medynved, Roshtqala, TJ            | TJ8   | 3993.2        | 37.1437       | 71.9538        | 0.0000   | 0             | 0.0000                   | 0          | 0     |
| Tajikistan         | Vose, TJ                           | TJ9   | 1258.5        | 37.8063       | 69.6028        | 0.0231   | 0.25          | 0.0058                   | 0          | 3     |
| Tajikistan         | Shurpast, Varzov, TJ               | TJ10  | 2674.8        | 39.0115       | 68.8227        | 0.0000   | 0             | 0.0000                   | 0          | 0     |
| Tajikistan         | Qurgonteppa, Sarband, TJ           | TJ11  | 627.2         | 37.7890       | 68.9546        | 0.0372   | 0.33          | 0.0123                   | 1          | 4     |
| Tajikistan         | Arzing, Tavildara, TJ              | TJ12  | 3372.1        | 38.8748       | 71.2837        | 0.0000   | 0             | 0.0000                   | 0          | 0     |
| Tajikistan         | Barchidev, Rushon, TJ              | TJ13  | 4442.3        | 38.3253       | 72.5141        | 0.0000   | 0             | 0.0000                   | 0          | 0     |
| Turkmenistan       | Karagez, Balkan, TKM               | TKM1  | 194.8         | 38.9723       | 55.3614        | 0.0565   | 0.25          | 0.0141                   | 1          | 3     |
| Turkmenistan       | Syul'men, Balkan, TKM              | TKM2  | 37.1          | 40.3474       | 53.3869        | 0.0502   | 0.25          | 0.0125                   | 1          | 3     |
| Turkmenistan       | Aydin, Balkan, TKM                 | TKM3  | 100.3         | 39.4455       | 54.9031        | 0.0402   | 0.25          | 0.0101                   | 1          | 3     |
| Turkmenistan       | Ekerem, Balkan, TKM                | TKM4  | -22.5         | 38.0836       | 53.9802        | 0.4088   | 0.67          | 0.2739                   | 2          | 8     |
| Turkmenistan       | Bekibent, Balkan, TKM              | TKM5  | 194.8         | 38.5147       | 55.2326        | 0.0565   | 0.25          | 0.0141                   | 1          | 3     |
| Turkmenistan       | Kabyl, Balkan, TKM                 | TKM6  | 37.1          | 40.3641       | 53.0793        | 0.0502   | 0.25          | 0.0125                   | 1          | 3     |
| Turkmenistan       | Unnamed 1, Balkan, TKM             | TKM7  | 124.2         | 40.6315       | 54.7053        | 0.0000   | 0             | 0.0000                   | 0          | 0     |
| Turkmenistan       | Unnamed 2, Balkan, TKM             | TKM8  | 144.2         | 41.7803       | 54.1670        | 0.0000   | 0             | 0.0000                   | 0          | 0     |
| Turkmenistan       | Kaplankyr Reserve1, Dashoguz, TKM  | TKM9  | 78.6          | 40.7731       | 57.8254        | 0.0000   | 0             | 0.0000                   | 0          | 0     |
| Turkmenistan       | Kaplankyr Reserve 2, Dashoguz, TKM | TKM10 | 42.3          | 41.9603       | 57.8364        | 0.0060   | 0.08          | 0.0005                   | 0          | 1     |
| Turkmenistan       | Shakhnamy, Dasoguz, TKM            | TKM11 | 84.4          | 42.0338       | 59.7700        | 0.0014   | 0.08          | 0.0001                   | 0          | 1     |
| Turkmenistan       | Unnamed 1, Mary, TKM               | TKM12 | 611.1         | 35.7385       | 62.3738        | 0.0118   | 0.17          | 0.0020                   | 0          | 2     |
| Turkmenistan       | Dervezekem, Mary, TKM              | TKM13 | 712.3         | 36.3691       | 64.1975        | 0.0158   | 0.17          | 0.0027                   | 0          | 2     |
| Turkmenistan       | Batash, Lebap, TKM                 | TKM14 | 394.8         | 37.9451       | 65.6257        | 0.0091   | 0.33          | 0.0030                   | 0          | 4     |
| Turkmenistan       | Unnamed 2, Mary, TKM               | TKM15 | 191.8         | 38.4717       | 62.3078        | 0.0107   | 0.25          | 0.0027                   | 0          | 3     |
| Turkmenistan       | Unnamed , Ahal, TKM                | TKM16 | 137.3         | 39.3607       | 60.1655        | 0.0204   | 0.25          | 0.0051                   | 0          | 3     |
| Turkmenistan       | Serbar, Balkan, TKM                | TKM17 | 359.5         | 38.9603       | 56.1116        | 0.0394   | 0.17          | 0.0067                   | 0          | 2     |

| Region and Country | Location                 | Code  | Elevation (m) | Latitude (°N) | Longitude (°E) | Pst      |               |                          |            |       |
|--------------------|--------------------------|-------|---------------|---------------|----------------|----------|---------------|--------------------------|------------|-------|
|                    |                          |       |               |               |                | MINF (A) | Fav-month (F) | Favourable index (A x F) | Risk score | Month |
| Turkmenistan       | Unnamed 3, Balkan, TKM   | TKM18 | 151.7         | 40.0537       | 55.8589        | 0.0000   | 0             | 0.0000                   | 0          | 0     |
| Turkmenistan       | Unnamed, Dashoguz, TKM   | TKM19 | 68.5          | 41.0222       | 57.2541        | 0.0000   | 0             | 0.0000                   | 0          | 0     |
| Turkmenistan       | Unnamed 4, Balkan, TKM   | TKM20 | 87.4          | 39.9527       | 56.4302        | 0.0266   | 0.17          | 0.0045                   | 0          | 2     |
| Uzbekistan         | Shahrisabz, Yakkabog, UZ | UZ1   | 1266.3        | 38.9944       | 66.8232        | 0.0127   | 0.17          | 0.0022                   | 0          | 2     |
| Uzbekistan         | Unnamed, Tamdy, UZ       | UZ2   | 268.1         | 42.8446       | 64.4941        | 0.0121   | 0.08          | 0.0010                   | 0          | 1     |
| Uzbekistan         | Unnamed 1, Muynak, UZ    | UZ3   | 49.6          | 43.9936       | 60.1435        | 0.0685   | 0.33          | 0.0226                   | 1          | 4     |
| Uzbekistan         | Unnamed 1, Kungrad, UZ   | UZ4   | 156.5         | 44.8099       | 57.9023        | 0.0048   | 0.17          | 0.0008                   | 0          | 2     |
| Uzbekistan         | Unnamed 2, Kungrad, UZ   | UZ5   | 90.5          | 41.9685       | 56.6719        | 0.0062   | 0.08          | 0.0005                   | 0          | 1     |
| Uzbekistan         | Vozrozhdeniya, UZ        | UZ6   | 34.7          | 44.9345       | 59.1328        | 0.4814   | 0.67          | 0.3225                   | 3          | 8     |
| Uzbekistan         | Unnamed 3, Kungrad, UZ   | UZ7   | 126.4         | 45.0588       | 57.9023        | 0.0030   | 0.08          | 0.0002                   | 0          | 1     |
| Uzbekistan         | Unnamed 4, Kungrad, UZ   | UZ8   | 108.2         | 45.2757       | 58.0781        | 0.0560   | 0.33          | 0.0185                   | 1          | 4     |
| Uzbekistan         | Unnamed 1, Karakiya, KZ  | UZ9   | 132.7         | 42.4891       | 54.0791        | 0.0000   | 0             | 0.0000                   | 0          | 0     |
| Uzbekistan         | Unnamed 2, Muynak, UZ    | UZ10  | 37.1          | 44.0252       | 59.0010        | 0.4651   | 0.67          | 0.3116                   | 3          | 8     |
| Uzbekistan         | Unnamed 3, Muynak, UZ    | UZ11  | 58.8          | 43.5175       | 58.7373        | 0.0459   | 0.33          | 0.0152                   | 1          | 4     |
| Uzbekistan         | Kungrad, UZ              | UZ12  | 150.2         | 44.1400       | 56.4082        | 0.0200   | 0             | 0.0000                   | 0          | 0     |
| Uzbekistan         | Ahangaran, UZ            | UZ13  | 1168.2        | 41.1319       | 69.9681        | 0.1250   | 0.33          | 0.0413                   | 1          | 4     |

**Proportion of sites with infection index 0.728**

#### Northwest Asia (59)

|         |                              |       |        |         |         |        |      |        |   |   |
|---------|------------------------------|-------|--------|---------|---------|--------|------|--------|---|---|
| Armenia | Lernahovit, Gegharkunik, ARM | ARM1  | 2029.7 | 40.0646 | 45.2619 | 0.0233 | 0.17 | 0.0040 | 0 | 2 |
| Armenia | Norekart, Gegharkunik, ARM   | ARM2  | 1988.9 | 40.2493 | 45.6903 | 0.0110 | 0.17 | 0.0019 | 0 | 2 |
| Armenia | Gandzakar, Tavush, ARM       | ARM3  | 1475.6 | 40.8254 | 45.2179 | 0.0395 | 0.17 | 0.0067 | 0 | 2 |
| Armenia | Krasar, Shirak, ARM          | ARM4  | 2070.9 | 41.0080 | 43.8007 | 0.0104 | 0.17 | 0.0018 | 0 | 2 |
| Armenia | Armavir, Armavir, ARM        | ARM5  | 1559.4 | 40.1570 | 43.9875 | 0.0096 | 0.17 | 0.0016 | 0 | 2 |
| Armenia | Semyonovka, Gegharkunik, ARM | ARM6  | 1737.4 | 40.6256 | 44.8773 | 0.0275 | 0.17 | 0.0047 | 0 | 2 |
| Armenia | Daranak, Gegharkunik, ARM    | ARM7  | 1988.9 | 40.3749 | 45.5915 | 0.0110 | 0.17 | 0.0019 | 0 | 2 |
| Armenia | Artsvanist, Gegharkunik, ARM | ARM8  | 1988.9 | 40.1318 | 45.5255 | 0.0110 | 0.17 | 0.0019 | 0 | 2 |
| Armenia | Tsovazard, Gegharkunik, ARM  | ARM9  | 2029.8 | 40.4502 | 45.0312 | 0.0233 | 0.17 | 0.0040 | 0 | 2 |
| Armenia | Dilijan, Bovakar Ridge, ARM  | ARM10 | 1737.4 | 40.8479 | 44.8725 | 0.0275 | 0.17 | 0.0047 | 0 | 2 |

| Region and Country | Location                                | Code  | Elevation (m) | Latitude (°N) | Longitude (°E) | Pst      |               |                          |            |       |
|--------------------|-----------------------------------------|-------|---------------|---------------|----------------|----------|---------------|--------------------------|------------|-------|
|                    |                                         |       |               |               |                | MINF (A) | Fav-month (F) | Favourable index (A x F) | Risk score | Month |
| Georgia            | Likhni, GRG                             | GRG1  | 996.6         | 43.1602       | 40.6256        | 0.5499   | 0.83          | 0.4564                   | 3          | 10    |
| Georgia            | Lukhi, Samegrelo-Zemo Svaneti, GRG      | GRG2  | 1259.3        | 42.9837       | 42.1308        | 0.1193   | 0.58          | 0.0692                   | 1          | 7     |
| Georgia            | Ergeta, Samegrelo-Zemo Svaneti, GRG     | GRG3  | 257.8         | 42.3861       | 41.6803        | 1.0000   | 0.92          | 0.9200                   | 4          | 11    |
| Georgia            | Zeda sameba, GRG                        | GRG4  | 538.1         | 41.7991       | 41.8671        | 0.8355   | 0.92          | 0.7687                   | 4          | 11    |
| Georgia            | Kvaisi, South Ossetia, GRG              | GRG5  | 1522.8        | 42.5365       | 43.6469        | 0.0161   | 0.25          | 0.0040                   | 0          | 3     |
| Georgia            | Rustavi, Kvemo Kartli, GRG              | GRG6  | 850.1         | 41.5611       | 45.1959        | 0.0562   | 0.33          | 0.0186                   | 1          | 4     |
| Georgia            | Telavi, Kakheti, GRG                    | GRG7  | 958.6         | 41.9463       | 45.5036        | 0.0580   | 0.25          | 0.0145                   | 1          | 3     |
| Georgia            | Lahili, Samegrelo-Zemo Svaneti, GRG     | GRG8  | 1668.8        | 42.9998       | 42.6361        | 0.0748   | 0.42          | 0.0314                   | 1          | 5     |
| Georgia            | Vabiskhevi, Borjomi nature Reserve, GRG | GRG9  | 1418.1        | 41.8049       | 43.1587        | 0.0291   | 0.33          | 0.0096                   | 1          | 4     |
| Turkey             | Ilyaslar, Bolu, TKY                     | TKY1  | 1142.1        | 40.9807       | 32.3042        | 0.0277   | 0.25          | 0.0069                   | 0          | 3     |
| Turkey             | Buyukcakirman, Erzincan, TKY            | TKY2  | 948.1         | 39.7756       | 39.6455        | 0.0446   | 0.17          | 0.0076                   | 0          | 2     |
| Turkey             | Karakoy, Denizli, TKY                   | TKY3  | 681.1         | 38.2045       | 28.8984        | 0.0106   | 0.08          | 0.0008                   | 0          | 1     |
| Turkey             | Gercam Mahallesi, Denizli, TKY          | TKY4  | 699.8         | 37.2487       | 28.9424        | 0.0191   | 0.08          | 0.0015                   | 0          | 1     |
| Turkey             | Sagrak Koyu, Isparta, TKY               | TKY5  | 1191.7        | 37.5629       | 30.9858        | 0.0162   | 0.17          | 0.0028                   | 0          | 2     |
| Turkey             | Cesmelisebil, Konya, TKY                | TKY6  | 1020.8        | 38.6178       | 32.5459        | 0.0047   | 0.17          | 0.0008                   | 0          | 2     |
| Turkey             | Isikkaya Mahallesi, Adana, TKY          | TKY7  | 1071.5        | 37.7021       | 35.5561        | 0.0090   | 0.17          | 0.0015                   | 0          | 2     |
| Turkey             | Kaymakli, Erzican, TKY                  | TKY8  | 1468.9        | 39.3012       | 38.8740        | 0.0000   | 0             | 0.0000                   | 0          | 0     |
| Turkey             | kale Koyu, Rize, TKY                    | TKY9  | 1555.5        | 40.8313       | 40.9175        | 0.1111   | 0.67          | 0.0744                   | 1          | 8     |
| Turkey             | Merkez mahallesi, Sinop, TKY            | TKY10 | 510.6         | 41.8737       | 34.8829        | 0.2507   | 0.58          | 0.1454                   | 2          | 7     |
| Turkey             | Sulek Koyu, Bartin, TKY                 | TKY11 | 671.6         | 41.4798       | 32.2462        | 0.1085   | 0.58          | 0.0629                   | 1          | 7     |
| Turkey             | Sayalar Mahallesi, Istanbul, TKY        | TKY12 | 73.9          | 41.3480       | 28.1592        | 0.6987   | 0.67          | 0.4681                   | 3          | 8     |
| Turkey             | Camliova Mahallesi, Antalya, TKY        | TKY13 | 281.3         | 36.3904       | 29.4776        | 0.7620   | 0.75          | 0.5715                   | 3          | 9     |
| Turkey             | Agackoy Koyu, Canakkale, TKY            | TKY14 | 256.9         | 39.7925       | 26.5693        | 0.2326   | 0.5           | 0.1163                   | 2          | 6     |
| Turkey             | Dogla Mahallesi, Bursa, TKY             | TKY15 | 181.6         | 40.2971       | 28.2612        | 0.3818   | 0.58          | 0.2214                   | 2          | 7     |
| Turkey             | Kaleici Mahallesi, Istanbul, TKY        | TKY16 | 73.9          | 41.1630       | 28.4370        | 0.6987   | 0.67          | 0.4681                   | 3          | 8     |
| Turkey             | Camkoy Koyu, Canakkale, TKY             | TKY17 | 161.1         | 40.0032       | 26.8000        | 0.3284   | 0.5           | 0.1642                   | 2          | 6     |
| Turkey             | Musellim Koyu, Kirklareli, TKY          | TKY18 | 134.6         | 41.4353       | 27.2175        | 0.0751   | 0.5           | 0.0376                   | 1          | 6     |
| Turkey             | Canakca Mahllesi, Istanbul, TKY         | TKY19 | 73.9          | 41.2539       | 28.4919        | 0.6987   | 0.67          | 0.4681                   | 3          | 8     |
| Turkey             | Imamlar Mahallesi, Sakarya, TKY         | TKY20 | 77.3          | 41.0719       | 30.4255        | 0.9540   | 0.83          | 0.7918                   | 4          | 10    |

| Region and Country | Location                             | Code  | Elevation (m) | Latitude (°N) | Longitude (°E) | Pst      |               |                          |            |       |
|--------------------|--------------------------------------|-------|---------------|---------------|----------------|----------|---------------|--------------------------|------------|-------|
|                    |                                      |       |               |               |                | MINF (A) | Fav-month (F) | Favourable index (A x F) | Risk score | Month |
| Turkey             | Haydarlar Mahallesi, Ankara, TKY     | TKY21 | 1077.3        | 40.2720       | 31.9416        | 0.0103   | 0.08          | 0.0008                   | 0          | 1     |
| Turkey             | Ezelter Koyu, Giresun, TKY           | TKY22 | 935.6         | 40.7564       | 38.2038        | 0.2332   | 0.5           | 0.1166                   | 2          | 6     |
| Turkey             | Ortaklar Koyu, Rize, TKY             | TKY23 | 1555.5        | 40.7731       | 40.8428        | 0.1111   | 0.67          | 0.0744                   | 1          | 8     |
| Turkey             | Esmepinar Koyu, Erzican, TKY         | TKY24 | 1929.8        | 39.9022       | 39.9177        | 0.0077   | 0.17          | 0.0013                   | 0          | 2     |
| Turkey             | Yolgecen, Artvin, TKY                | TKY25 | 852.7         | 41.3034       | 41.2899        | 0.6660   | 0.83          | 0.5528                   | 3          | 10    |
| Turkey             | Kaplanli Kyo, Afyonkarahisar, TKY    | TKY26 | 1230.5        | 38.9176       | 30.5793        | 0.0217   | 0.17          | 0.0037                   | 0          | 2     |
| Turkey             | Kokulupinar Koyu, Agri, TKY          | TKY27 | 2009.8        | 39.9527       | 42.7302        | 0.0044   | 0.08          | 0.0004                   | 0          | 1     |
| Turkey             | Sekirhan, Diyarbakir, TKY            | TKY28 | 1475.9        | 38.5405       | 40.9724        | 0.0070   | 0.25          | 0.0017                   | 0          | 3     |
| Turkey             | Bulduk Mahallesi, Konya, TKY         | TKY29 | 1031.4        | 39.0201       | 32.7107        | 0.0042   | 0.08          | 0.0003                   | 0          | 1     |
| Turkey             | Yeni Mahallesi, Denizli, TKY         | TKY30 | 681.1         | 38.0576       | 28.8435        | 0.0106   | 0.08          | 0.0008                   | 0          | 1     |
| Turkey             | Ceceli Mahallesi, Kahramanmaras, TKY | TKY31 | 799.9         | 37.3449       | 36.8415        | 0.0245   | 0.25          | 0.0061                   | 0          | 3     |
| Turkey             | Yagmurlar Koyu, Kutaha, TKY          | TKY32 | 1111.7        | 39.0833       | 29.6125        | 0.0257   | 0.17          | 0.0044                   | 0          | 2     |
| Turkey             | Eskigomu Koyu, Afyonkarahisar, TKY   | TKY33 | 1143.1        | 39.0833       | 30.9748        | 0.0239   | 0.17          | 0.0041                   | 0          | 2     |
| Turkey             | Adakoy Koyu, Zonguldak, TKY          | TKY34 | 671.6         | 41.4353       | 32.1833        | 0.1085   | 0.58          | 0.0629                   | 1          | 7     |
| Turkey             | Yonkali Koyu, Corum, TKY             | TKY35 | 1026.5        | 40.7731       | 34.2048        | 0.0135   | 0.17          | 0.0023                   | 0          | 2     |
| Turkey             | Gundogan Mahallesi, Ankara, TKY      | TKY36 | 1000.7        | 39.4625       | 32.2492        | 0.0079   | 0.08          | 0.0006                   | 0          | 1     |
| Turkey             | Dereli Koyu, Bartin, TKY             | TKY37 | 404.9         | 41.6491       | 32.8205        | 0.5554   | 0.67          | 0.3721                   | 3          | 8     |
| Turkey             | Ahlatcik Koyu, Corum, TKY            | TKY38 | 1026.5        | 40.7731       | 34.2707        | 0.0135   | 0.17          | 0.0023                   | 0          | 2     |
| Turkey             | Yaylakent Koyu, Tokat, TKY           | TKY39 | 1076.9        | 40.1378       | 36.0725        | 0.0233   | 0.17          | 0.0040                   | 0          | 2     |
| Turkey             | Akoren, Mengen, TKY                  | TKY40 | 40.357381     | 41.0043       | 32.0315        | 0.3614   | 0.75          | 0.2710                   | 2          | 9     |

**Proportion of sites with infection index 0.983**

#### Southwest Asia (50)

|       |                                |      |       |         |         |        |      |        |   |   |
|-------|--------------------------------|------|-------|---------|---------|--------|------|--------|---|---|
| Egypt | Unnamed, Hala'ib Triangle, EGY | EGY1 | 152   | 22.5745 | 35.9516 | 0.0000 | 0    | 0.0000 | 0 | 0 |
| Egypt | Unnamed, Qesm Marsa Alam, EGY  | EGY2 | 283.3 | 25.5435 | 34.4575 | 0.0000 | 0    | 0.0000 | 0 | 0 |
| Egypt | Qism ras Ghareb, Red Sea, EGY  | EGY3 | 321.8 | 27.8206 | 33.1611 | 0.0000 | 0    | 0.0000 | 0 | 0 |
| Egypt | Qesm Nwebaa, South Sinai, EGY  | EGY4 | 726.4 | 29.1531 | 34.5454 | 0.0000 | 0    | 0.0000 | 0 | 0 |
| Egypt | Arish, North Sinai, EGY        | EGY5 | 194.9 | 30.9786 | 33.8203 | 0.0000 | 0    | 0.0000 | 0 | 0 |
| Egypt | Kom-El-Farag, El Beheira, EGY  | EGY6 | 29.1  | 30.9786 | 30.0190 | 0.0000 | 0.08 | 0.0000 | 0 | 1 |

| Region and<br>Country | Location                                    | Code   | Elevation<br>(m) | Latitude<br>(°N) | Longitude<br>(°E) | Pst         |                  |                             |               |       |
|-----------------------|---------------------------------------------|--------|------------------|------------------|-------------------|-------------|------------------|-----------------------------|---------------|-------|
|                       |                                             |        |                  |                  |                   | MINF<br>(A) | Fav-month<br>(F) | Favourable index<br>(A x F) | Risk<br>score | Month |
| Egypt                 | Qism Moury Matrouh, Matrouh, EGY            | EGY7   | 117.5            | 30.6956          | 27.6679           | 0.0000      | 0                | 0.0000                      | 0             | 0     |
| Egypt                 | Qesm Sidi Brani, Matrouh, EGY               | EGY8   | 28               | 31.5046          | 25.9101           | 0.2412      | 0                | 0.0000                      | 0             | 0     |
| Egypt                 | Qesm Sidi Brani 1, Matrouh, EGY             | EGY9   | -26.1            | 29.0187          | 27.3164           | 0.0000      | 0.5              | 0.0000                      | 0             | 6     |
| Egypt                 | Qesm Al Wahat Al Khargah 1, New Valley, EGY | EEGY10 | 224.2            | 26.8643          | 31.2594           | 0.0000      | 0                | 0.0000                      | 0             | 0     |
| Egypt                 | Qesm Al Wahat Al Khargah 2, New Valley, EGY | EEGY11 | 254.3            | 22.8785          | 32.3701           | 0.0000      | 0                | 0.0000                      | 0             | 0     |
| Egypt                 | Abu ar Rish Basri, Red Sea, EGY             | EGY12  | 252.6            | 24.2480          | 32.9853           | 0.0000      | 0                | 0.0000                      | 0             | 0     |
| Egypt                 | Qesm Al Wahat Ad Dakhlah 1, New Valley, EGY | EEGY13 | 218.6            | 22.9797          | 29.6894           | 0.0000      | 0                | 0.0000                      | 0             | 0     |
| Egypt                 | Qesm Hurghada 1, Red Sea, EGY               | EGY14  | 452.5            | 26.9843          | 33.2957           | 0.0000      | 0                | 0.0000                      | 0             | 0     |
| Egypt                 | Qesm Sham Ash Sheikh, South Sinai, EGY      | EGY15  | 418.2            | 28.3320          | 34.1197           | 0.0000      | 0                | 0.0000                      | 0             | 0     |
| Egypt                 | Ataqah 1, Suez, EGY                         | EGY16  | 341.1            | 29.4525          | 32.3838           | 0.0000      | 0                | 0.0000                      | 0             | 0     |
| Egypt                 | Qesm Hurghada 2, Red Sea, EGY               | EGY17  | 464.1            | 27.3776          | 33.1336           | 0.0000      | 0                | 0.0000                      | 0             | 0     |
| Egypt                 | Unanmed, Red Sea, EGY                       | EGY18  | 226.4            | 27.9857          | 31.1396           | 0.0000      | 0                | 0.0000                      | 0             | 0     |
| Egypt                 | Ataqah 2, Suez, EGY                         | EGY19  | 341.1            | 29.3544          | 32.1833           | 0.0000      | 0                | 0.0000                      | 0             | 0     |
| Egypt                 | Shata, Damietta, EGY                        | EGY20  | 2.4              | 31.4522          | 31.8946           | 0.0095      | 0                | 0.0000                      | 0             | 0     |
| Iraq                  | Aghajah Mashad, Tooz, IQ                    | IRQ1   | 503.8            | 35.0084          | 44.6675           | 0.0041      | 0.08             | 0.0003                      | 0             | 1     |
| Iraq                  | Unnamed, Ana, IQ                            | IRQ2   | 339.8            | 33.6292          | 41.8990           | 0.0000      | 0                | 0.0000                      | 0             | 0     |
| Iraq                  | Unnamed, RTE France, KT                     | IRQ3   | 121.5            | 29.7415          | 47.3482           | 0.0124      | 0.08             | 0.0010                      | 0             | 1     |
| Iraq                  | Unnamed, Najaf, IQ                          | IRQ4   | 330.5            | 30.2363          | 44.0083           | 0.0060      | 0.08             | 0.0005                      | 0             | 1     |
| Iraq                  | Unnamed, Ramadi, IQ                         | IRQ5   | 84.5             | 33.0418          | 43.4370           | 0.0000      | 0                | 0.0000                      | 0             | 0     |
| Israel                | Givat Nili, Har Alexander, IS               | IS1    | 176.9            | 32.5408          | 35.0425           | 0.0422      | 0.25             | 0.0105                      | 1             | 3     |
| Israel                | Ohad, Eshkol, IS                            | IS2    | 104.5            | 31.2349          | 34.4493           | 0.0102      | 0.17             | 0.0017                      | 0             | 2     |
| Lebanon               | Mazraat Matariyet Jbaa, Maghdouche', LB     | Lb1    | 258.8            | 33.5171          | 35.3941           | 0.9285      | 0.58             | 0.5385                      | 3             | 7     |
| Oman                  | Fajri, Al Batinah, OM                       | OM1    | 625.3            | 23.4970          | 57.1910           | 0.0000      | 0                | 0.0000                      | 0             | 0     |
| Oman                  | Unnamed, Ash Sharqiyah, South, OM           | OM2    | 98.9             | 22.2418          | 59.5640           | 0.0000      | 0                | 0.0000                      | 0             | 0     |
| Oman                  | Unnamed, Dhofar, OM                         | OM3    | 423.8            | 17.4906          | 54.9058           | 0.0000      | 0                | 0.0000                      | 0             | 0     |
| Oman                  | Hai;at La'mia, Al Wusta, OM                 | OM4    | 114.1            | 20.9753          | 56.0044           | 0.0000      | 0                | 0.0000                      | 0             | 0     |
| Saudi Arab            | Tawala, Tabuk, SA                           | SA1    | 233.1            | 25.4567          | 37.2837           | 0.0000      | 0                | 0.0000                      | 0             | 0     |
| Saudi Arab            | Unnamed 1, Tabuk, SA                        | SA2    | 516.8            | 28.2788          | 35.4380           | 0.0000      | 0                | 0.0000                      | 0             | 0     |
| Saudi Arab            | Unnamed 2, Tabuk, SA                        | SA3    | 422.8            | 24.9796          | 37.5474           | 0.0000      | 0                | 0.0000                      | 0             | 0     |

| Region and Country | Location                       | Code | Elevation (m) | Latitude (°N) | Longitude (°E) | Pst      |               |                          |            |       |
|--------------------|--------------------------------|------|---------------|---------------|----------------|----------|---------------|--------------------------|------------|-------|
|                    |                                |      |               |               |                | MINF (A) | Fav-month (F) | Favourable index (A x F) | Risk score | Month |
| Saudi Arab         | Unnamed, Al Qunfudhah, SA      | SA4  | 578.5         | 19.5738       | 41.3706        | 0.0000   | 0             | 0.0000                   | 0          | 0     |
| Saudi Arab         | Shuwaq, Tabuk, SA              | SA5  | 431.8         | 27.4630       | 36.4048        | 0.0000   | 0             | 0.0000                   | 0          | 0     |
| Saudi Arab         | Unanmmed, Forest area, SA      | SA6  | 798           | 30.7286       | 39.4820        | 0.0000   | 0             | 0.0000                   | 0          | 0     |
| Saudi Arab         | Unnamed, Northern Borders, SA  | SA7  | 576.8         | 29.6269       | 41.8111        | 0.0000   | 0             | 0.0000                   | 0          | 0     |
| Saudi Arab         | Unanmed, Al Nufud Al Kabir, SA | SA8  | 546.2         | 26.8397       | 45.6783        | 0.0013   | 0.08          | 0.0001                   | 0          | 1     |
| Saudi Arab         | Unnamed, Al Aflaj, SA          | SA9  | 448.9         | 21.1829       | 47.3482        | 0.0000   | 0             | 0.0000                   | 0          | 0     |
| Saudi Arab         | Al Shinayin, Abu Dhabi, UAE    | SA10 | 80.1          | 23.7009       | 54.2915        | 0.0000   | 0             | 0.0000                   | 0          | 0     |
| Saudi Arab         | Unnamed, Al Ahsa, SA           | SA11 | 87.6          | 25.4591       | 50.1607        | 0.0000   | 0             | 0.0000                   | 0          | 0     |
| Syria              | Babdh, Jableh, SY              | SY1  | 382.5         | 35.2578       | 36.0533        | 0.0530   | 0.42          | 0.0223                   | 1          | 5     |
| Syria              | Khirbet Ghazaleh, Daraa, SY    | SY2  | 710.7         | 32.7074       | 36.1631        | 0.0379   | 0.17          | 0.0064                   | 0          | 2     |
| Syria              | Palmyra, SY                    | SY3  | 639.6         | 34.8440       | 38.1846        | 0.0379   | 0.17          | 0.0064                   | 0          | 2     |
| Yemen              | Karad, Ad Dali, YM             | YM1  | 1424.2        | 13.8098       | 44.5787        | 0.0000   | 0             | 0.0000                   | 0          | 0     |
| Yemen              | Samarma, Al Mahrah, YM         | YM2  | 440.1         | 15.2985       | 50.9507        | 0.0000   | 0             | 0.0000                   | 0          | 0     |
| Yemen              | Unnamed, Hadhramaut, YM        | YM3  | 623.8         | 17.5325       | 48.2261        | 0.0000   | 0             | 0.0000                   | 0          | 0     |
| Yemen              | Al Harajah, Hajjah, YM         | YM4  | 106.9         | 15.9756       | 42.9966        | 0.0000   | 0             | 0.0000                   | 0          | 0     |

**Proportion of sites with infection index 0.24**

#### Adjoining European countries (53)

|          |                                |      |       |         |         |        |      |        |   |    |
|----------|--------------------------------|------|-------|---------|---------|--------|------|--------|---|----|
| Albania  | Sheshi, Tepelene, ALB          | ALB1 | 315.4 | 40.3474 | 19.9150 | 0.6766 | 0.83 | 0.5616 | 3 | 10 |
| Bulgaria | Zhitosvyat, Karnobat, BL       | BL1  | 235.1 | 42.4915 | 26.9806 | 0.0124 | 0.25 | 0.0031 | 0 | 3  |
| Bulgaria | Krupen, Kavarna, BL            | BL2  | 99.7  | 43.5517 | 28.2331 | 0.1583 | 0.58 | 0.0918 | 1 | 7  |
| Bulgaria | Prismenovo, Primorsko, BL      | BL3  | 149.2 | 42.2317 | 27.6178 | 0.4070 | 0.67 | 0.2727 | 2 | 8  |
| Bulgaria | Kartipanya, Dryanovo, BL       | BL4  | 479.1 | 42.9274 | 25.4645 | 0.1621 | 0.42 | 0.0681 | 1 | 5  |
| Bulgaria | Manastirishte, Hayredin, BL    | BL5  | 143.2 | 43.5517 | 23.6408 | 0.0698 | 0.33 | 0.0230 | 1 | 4  |
| Bulgaria | Pomen, Dve mongili, BL         | BL6  | 300.1 | 43.4879 | 25.9699 | 0.0430 | 0.42 | 0.0181 | 1 | 5  |
| Bulgaria | Byalkovtsi, Elena, BL          | BL7  | 344.5 | 42.9435 | 26.0138 | 0.0240 | 0.17 | 0.0041 | 0 | 2  |
| Bulgaria | Trakia, Opan, BL               | BL8  | 322.5 | 42.1992 | 25.6183 | 0.0136 | 0.17 | 0.0023 | 0 | 2  |
| Bulgaria | Byal Kladenets, Stambolovo, BL | BL9  | 317.7 | 41.6433 | 25.6183 | 0.0155 | 0.25 | 0.0039 | 0 | 3  |
| Bulgaria | Lyahovo, Balchik, BL           | BL10 | 74.7  | 43.4251 | 28.0274 | 0.6336 | 0.75 | 0.4752 | 3 | 9  |

| Region and Country |  | Location                                  | Code | Elevation (m) | Latitude (°N) | Longitude (°E) | Pst      |               |                          |                  |
|--------------------|--|-------------------------------------------|------|---------------|---------------|----------------|----------|---------------|--------------------------|------------------|
|                    |  |                                           |      |               |               |                | MINF (A) | Fav-month (F) | Favourable index (A x F) | Risk score Month |
| Croatia            |  | Ridane, CR                                | CR1  | 404.2         | 43.9304       | 16.2676        | 0.4712   | 0.83          | 0.3911                   | 3 10             |
| Croatia            |  | Baska, Opcina, CR                         | CR2  | 252.2         | 44.9034       | 14.7734        | 0.8285   | 1             | 0.8285                   | 4 12             |
| Greece             |  | Doumpia, Anthemountas, GR                 | GR1  | 277.4         | 40.5147       | 23.3393        | 0.1410   | 0.42          | 0.0592                   | 1 5              |
| Greece             |  | Kokkinaras, Koropi, GR                    | GR2  | 74.2          | 37.9104       | 23.9326        | 0.7091   | 0.75          | 0.5318                   | 3 9              |
| Greece             |  | Gergeri, Rouvas, GR                       | GR3  | 172.3         | 35.1747       | 24.9433        | 0.9286   | 0.75          | 0.6965                   | 3 9              |
| Greece             |  | Dafniotissa, Amaliada, GR                 | GR4  | 34            | 37.8410       | 21.4717        | 0.7937   | 0.83          | 0.6588                   | 3 10             |
| Greece             |  | Plagia, Acheloos, GR                      | GR5  | 785.4         | 39.2331       | 21.4277        | 0.3082   | 0.42          | 0.1294                   | 2 5              |
| Greece             |  | Paleochori, Sperchiada, GR                | GR6  | 630.5         | 38.8406       | 21.9551        | 0.2339   | 0.58          | 0.1356                   | 2 7              |
| Italy              |  | Ai Boschi Castelfranco, Treviso, IT       | IT1  | 288.6         | 45.6456       | 12.0049        | 0.3160   | 0.92          | 0.2907                   | 2 11             |
| Italy              |  | Ostellato, Ferrara, IT                    | IT2  | 51.5          | 44.7163       | 11.9170        | 0.1724   | 0.58          | 0.1000                   | 1 7              |
| Italy              |  | Sassocorvaro, Pesaro, IT                  | IT3  | 392.9         | 43.7719       | 12.4883        | 0.3410   | 0.67          | 0.2285                   | 2 8              |
| Italy              |  | Campoli, Teramo, IT                       | IT4  | 460.5         | 42.7156       | 13.6748        | 0.6597   | 0.75          | 0.4948                   | 3 9              |
| Italy              |  | Acquaviva Collecroce, Campobasso, IT      | IT5  | 395.8         | 41.8677       | 14.7295        | 0.4340   | 0.75          | 0.3255                   | 3 9              |
| Montenegro         |  | Lipa, Cetinje, MN                         | MN1  | 839.6         | 42.5539       | 18.8603        | 0.4905   | 0.83          | 0.4071                   | 3 10             |
| Romania            |  | Unnamed, Casimcea, RM                     | RM1  | 59.7          | 44.6851       | 28.3985        | 0.0407   | 0.25          | 0.0102                   | 1 3              |
| Romania            |  | Valea Seana, Urziceni, RM                 | RM2  | 503.6         | 45.0122       | 26.2892        | 0.0470   | 0.33          | 0.0155                   | 1 4              |
| Romania            |  | Maneciu-Ungureni, Maneciu, RM             | RM3  | 503.6         | 45.3220       | 26.0090        | 0.0470   | 0.33          | 0.0155                   | 1 4              |
| Romania            |  | Unnamed, Bustuchin, RM                    | RM4  | 333.4         | 44.9656       | 23.7129        | 0.0766   | 0.42          | 0.0322                   | 1 5              |
| Romania            |  | Piscu Nou, Piscu Vechi, RM                | RM5  | 185.3         | 43.9224       | 23.1526        | 0.0775   | 0.33          | 0.0256                   | 1 4              |
| Romania            |  | Valcelele de Sus, Valcelele, RM           | RM6  | 135.2         | 44.2932       | 24.5806        | 0.0384   | 0.42          | 0.0161                   | 1 5              |
| Romania            |  | Runc, Zlatna, RM                          | RM7  | 636.5         | 46.1882       | 23.1965        | 0.0935   | 0.42          | 0.0393                   | 1 5              |
| Romania            |  | Strugureni, Chiochis, RM                  | RM8  | 485.5         | 46.9810       | 24.2292        | 0.0455   | 0.42          | 0.0191                   | 1 5              |
| Romania            |  | Cuza Voda, racovita, RM                   | RM9  | 121.3         | 45.3607       | 27.4372        | 0.0401   | 0.33          | 0.0132                   | 1 4              |
| Romania            |  | Razim lake, RM                            | RM10 | 12.4          | 44.8021       | 29.1181        | 0.6419   | 0.42          | 0.2696                   | 2 5              |
| Romania            |  | Podul Lung, Calarasi, MLD                 | RM11 | 158.4         | 47.2576       | 28.2502        | 0.0286   | 0.75          | 0.0214                   | 1 9              |
| Romania            |  | Caltesti, Pietroasele, RM                 | RM12 | 296.6         | 45.1131       | 26.5913        | 0.0438   | 0.17          | 0.0075                   | 0 2              |
| Slovenia           |  | Vedrijan, SL                              | SL1  | 778.1         | 46.0130       | 13.5430        | 0.2074   | 0.67          | 0.1389                   | 2 8              |
| Ukraine            |  | Verkhni Stanivtsi, Chernivtsi Oblast, UKR | UKR1 | 408.5         | 48.2693       | 25.5696        | 0.4578   | 0.42          | 0.1923                   | 2 5              |
| Ukraine            |  | Pavlivka, Odessa Oblast, UKR              | UKR2 | 28.4          | 45.9596       | 29.5466        | 0.1365   | 0.67          | 0.0914                   | 1 8              |

| Region and<br>Country                | Location                            | Code       | Elevation<br>(m) | Latitude<br>(°N) | Longitude<br>(°E) | Pst           |                  |                             |               |             |
|--------------------------------------|-------------------------------------|------------|------------------|------------------|-------------------|---------------|------------------|-----------------------------|---------------|-------------|
|                                      |                                     |            |                  |                  |                   | MINF<br>(A)   | Fav-month<br>(F) | Favourable index<br>(A x F) | Risk<br>score | Month       |
| Ukraine                              | Creamian Peninsula, UKR             | UKR3       | 222.2            | 44.6382          | 34.1334           | 0.2171        | 0.67             | 0.1455                      | 2             | 8           |
| Ukraine                              | Sevastopol 1, Crimean, UKR          | UKR4       | 66.4             | 45.3838          | 33.8642           | 0.7011        | 0.58             | 0.4067                      | 3             | 7           |
| Ukraine                              | Sevastopol 2, Crimean, UKR          | UKR5       | 10.8             | 46.4992          | 32.8315           | 0.3865        | 0.58             | 0.2242                      | 2             | 7           |
| Ukraine                              | Novohryhorivka, Kherson Oblast, UKR | UKR6       | 7.8              | 46.4083          | 35.0068           | 0.0773        | 0.75             | 0.0580                      | 1             | 9           |
| Ukraine                              | Yelyseivka, Zaporizhia Oblast, UKR  | UKR7       | 44.6             | 46.9960          | 36.4570           | 0.0485        | 0.75             | 0.0364                      | 1             | 9           |
| Ukraine                              | Ahronomichne, Donetsk Oblast, UKR   | UKR8       | 141.9            | 47.8582          | 38.1709           | 0.0410        | 0.42             | 0.0172                      | 1             | 5           |
| Ukraine                              | Shtormove, Luhansk Oblast, UKR      | UKR9       | 127.5            | 49.0962          | 38.9179           | 0.0267        | 0.5              | 0.0134                      | 1             | 6           |
| Ukraine                              | Zavadivka, Kirovohrad Oblast, UKR   | UKR10      | 154.2            | 48.0054          | 32.3042           | 0.0825        | 0.42             | 0.0347                      | 1             | 5           |
| Ukraine                              | Kunychche, Vinnytsia Oblast, UKR    | UKR11      | 219.1            | 48.4882          | 28.9424           | 0.0987        | 0.33             | 0.0326                      | 1             | 4           |
| Ukraine                              | Potaptsi, Cherkasy Oblast, UKR      | UKR12      | 140.1            | 49.8529          | 31.2275           | 0.0674        | 0.33             | 0.0222                      | 1             | 4           |
| Ukraine                              | Kalivka, Sumy Oblast, UKR           | UKR13      | 167.1            | 52.0667          | 33.5786           | 0.0921        | 0.42             | 0.0387                      | 1             | 5           |
| Ukraine                              | Rohovchi, Khmelnytskyi Oblast, UKR  | UKR14      | 244.9            | 50.0931          | 27.3823           | 0.2102        | 0.42             | 0.0883                      | 1             | 5           |
| Ukraine                              | Novi Sokoly, Kyiv Oblast, UKR       | UKR15      | 132.8            | 51.1525          | 29.8872           | 0.0660        | 0.42             | 0.0277                      | 1             | 5           |
| <b>Total number of sites or mean</b> |                                     | <b>607</b> |                  |                  |                   | <b>0.0933</b> | <b>0.2532</b>    | <b>0.0558</b>               | <b>0.6474</b> | <b>3.04</b> |

**Table S1.** Elevations, latitudes, longitudes, monthly infection index (MINformis f. sp. *tritici* (*Pst*) and the stem rust pathogen, *P. graminis* f. sp. *tritici* (*Pgt*) in relation to barberry growth in Asia and a

|                 |                          |      | Pgt    |           |               |       |       | Barberry |           |                   |             |        |
|-----------------|--------------------------|------|--------|-----------|---------------|-------|-------|----------|-----------|-------------------|-------------|--------|
| Region and      |                          |      | MINF   | Fav-month | Favourable    | Risk  |       | NHTT     | Fav-month | Favourable growth | Suitability |        |
| Country         | Location                 | Code | (B)    | (F)       | index (B x F) | score | Month | (D)      | (F)       | index (D x F)     | score       | Months |
| East Asia (250) |                          |      |        |           |               |       |       |          |           |                   |             |        |
| Bangladesh      | Nalian Range, BD         | BD1  | 0.1068 | 0.42      | 0.0448        | 1     | 5     | 0.0137   | 0.33      | 0.0045            | 0           | 4      |
| Bangladesh      | Rangamati, BD            | BD2  | 0.1634 | 0.58      | 0.0948        | 1     | 7     | 0.0473   | 0.42      | 0.0199            | 0           | 5      |
| Bangladesh      | Genduram, BD             | BD3  | 0.0536 | 0.50      | 0.0268        | 1     | 6     | 0.0332   | 0.42      | 0.0138            | 0           | 5      |
| Bangladesh      | Durgaour, BD             | BD4  | 0.1475 | 0.42      | 0.0619        | 1     | 5     | 0.0102   | 0.25      | 0.0026            | 0           | 3      |
| Bangladesh      | Ati Ulain, BD            | BD5  | 0.0920 | 0.33      | 0.0303        | 1     | 4     | 0.0232   | 0.33      | 0.0077            | 0           | 4      |
| Bhutan          | Wangdue Phodrang, BH     | BH1  | 0.3315 | 0.33      | 0.1094        | 2     | 4     | 0.8407   | 1.00      | 0.8407            | 4           | 12     |
| Bhutan          | Samdrup Jongkhar, BH     | BH2  | 0.0868 | 0.67      | 0.0581        | 1     | 8     | 0.0553   | 0.50      | 0.0277            | 0           | 6      |
| Bhutan          | Gasa, BH                 | BH3  | 0.1887 | 0.33      | 0.0623        | 1     | 4     | 0.8383   | 1.00      | 0.8383            | 4           | 12     |
| Bhutan          | Lhuntse, BH              | BH4  | 0.1881 | 0.33      | 0.0621        | 1     | 4     | 0.7762   | 1.00      | 0.7762            | 4           | 12     |
| Bhutan          | Kangpar, BH              | BH5  | 0.1845 | 0.67      | 0.1236        | 2     | 8     | 0.4759   | 1.00      | 0.4759            | 2           | 12     |
| Bhutan          | Xigate, BH               | BH6  | 0.2451 | 0.33      | 0.0809        | 1     | 4     | 0.8477   | 1.00      | 0.8477            | 4           | 12     |
| Bhutan          | Putao 2, BH              | BH7  | 0.2861 | 0.42      | 0.1202        | 2     | 5     | 0.5732   | 1.00      | 0.5732            | 3           | 12     |
| Bhutan          | Putao 3, BH              | BH8  | 0.1320 | 0.58      | 0.0766        | 1     | 7     | 0.1026   | 0.58      | 0.0598            | 0           | 7      |
| Bhutan          | Daifam, BH               | BH9  | 0.0863 | 0.58      | 0.0501        | 1     | 7     | 0.0603   | 0.58      | 0.0352            | 0           | 7      |
| China           | Litang, Sichuan, CH      | CH1  | 0.0418 | 0.08      | 0.0033        | 0     | 1     | 0.7599   | 1.00      | 0.7599            | 4           | 12     |
| China           | Batang 1, Sichuan, CH    | CH2  | 0.0443 | 0.25      | 0.0111        | 1     | 3     | 0.7359   | 1.00      | 0.7359            | 4           | 12     |
| China           | Kangding, Sichuan, CH    | CH3  | 0.0525 | 0.17      | 0.0089        | 1     | 2     | 0.8197   | 1.00      | 0.8197            | 4           | 12     |
| China           | Shawan 1, Sichuan, CH    | CH4  | 0.3477 | 0.83      | 0.2886        | 2     | 10    | 0.4160   | 0.75      | 0.3120            | 2           | 9      |
| China           | Suijiang, Yunnan, CH     | CH5  | 0.3722 | 0.75      | 0.2791        | 2     | 9     | 0.4639   | 0.83      | 0.3866            | 2           | 10     |
| China           | Dechang, Sichuan, CH     | CH6  | 0.1359 | 0.50      | 0.0680        | 1     | 6     | 0.4602   | 1.00      | 0.4602            | 2           | 12     |
| China           | Huangling, Shaanxi, CH   | CH7  | 0.0456 | 0.33      | 0.0150        | 1     | 4     | 0.4532   | 1.00      | 0.4532            | 2           | 12     |
| China           | Jiaokou, Shaanxi, CH     | CH8  | 0.0287 | 0.17      | 0.0049        | 0     | 2     | 0.4143   | 1.00      | 0.4143            | 2           | 12     |
| China           | Shennonhja, Hubei, CH    | CH9  | 0.0377 | 0.42      | 0.0158        | 1     | 5     | 0.4751   | 1.00      | 0.4751            | 2           | 12     |
| China           | Kaixian, Chongqing, CH   | CH10 | 0.1516 | 0.58      | 0.0879        | 1     | 7     | 0.4576   | 0.83      | 0.3813            | 2           | 10     |
| China           | Hejiang, Sichuan, CH     | CH11 | 0.2794 | 0.83      | 0.2319        | 2     | 10    | 0.3538   | 0.75      | 0.2654            | 1           | 9      |
| China           | Alxa, Inner Mongolia, CH | CH12 | 0.0507 | 0.42      | 0.0213        | 1     | 5     | 0.4402   | 1.00      | 0.4402            | 2           | 12     |

| Region and Country |  | Location                  | Code | Pgt      |               |                          |            | Barberry |          |               |                                 |                   |        |
|--------------------|--|---------------------------|------|----------|---------------|--------------------------|------------|----------|----------|---------------|---------------------------------|-------------------|--------|
|                    |  |                           |      | MINF (B) | Fav-month (F) | Favourable index (B x F) | Risk score | Month    | NHTT (D) | Fav-month (F) | Favourable growth index (D x F) | Suitability score | Months |
| China              |  | Tianzhu, Gansu, CH        | CH13 | 0.0288   | 0.17          | 0.0049                   | 0          | 2        | 0.5637   | 1.00          | 0.5637                          | 3                 | 12     |
| China              |  | Guinan, Qinghai, CH       | CH14 | 0.0045   | 0.08          | 0.0004                   | 0          | 1        | 0.5866   | 1.00          | 0.5866                          | 3                 | 12     |
| China              |  | Nanzhao, Henan, CH        | CH15 | 0.0292   | 0.42          | 0.0122                   | 1          | 5        | 0.4372   | 0.83          | 0.3644                          | 2                 | 10     |
| China              |  | Zhenxiong, Yunnan, CH     | CH16 | 0.2612   | 0.75          | 0.1959                   | 2          | 9        | 0.4295   | 0.92          | 0.3937                          | 2                 | 11     |
| China              |  | Fengqing, Yunnan, CH      | CH17 | 0.1159   | 0.67          | 0.0776                   | 1          | 8        | 0.2181   | 1.00          | 0.2181                          | 1                 | 12     |
| China              |  | Batang 2, Sichuan, CH     | CH18 | 0.0443   | 0.25          | 0.0111                   | 1          | 3        | 0.7359   | 1.00          | 0.7359                          | 4                 | 12     |
| China              |  | Daguan, Yunnan, CH        | CH19 | 0.3170   | 0.75          | 0.2377                   | 2          | 9        | 0.4133   | 0.83          | 0.3444                          | 2                 | 10     |
| China              |  | Danba, Sichuan, CH        | CH20 | 0.0117   | 0.25          | 0.0029                   | 0          | 3        | 0.7751   | 1.00          | 0.7751                          | 4                 | 12     |
| China              |  | Dayi, Sichuan, CH         | CH21 | 0.4200   | 0.58          | 0.2436                   | 2          | 7        | 0.6116   | 1.00          | 0.6116                          | 3                 | 12     |
| China              |  | Shawan 2, Sicuan, CH      | CH22 | 0.3477   | 0.83          | 0.2886                   | 2          | 10       | 0.4160   | 0.75          | 0.3120                          | 2                 | 9      |
| China              |  | Junlian xian, Sichuan, CH | CH23 | 0.3170   | 0.75          | 0.2377                   | 2          | 9        | 0.4133   | 0.83          | 0.3444                          | 2                 | 10     |
| China              |  | Banan, Chongqing, CH      | CH24 | 0.2496   | 0.75          | 0.1872                   | 2          | 9        | 0.3907   | 0.75          | 0.2930                          | 1                 | 9      |
| China              |  | Xixia, Henan, CH          | CH25 | 0.0348   | 0.25          | 0.0087                   | 1          | 3        | 0.4459   | 0.83          | 0.3716                          | 2                 | 10     |
| China              |  | Taibai, Shaanxi, CH       | CH26 | 0.0706   | 0.33          | 0.0233                   | 1          | 4        | 0.5121   | 1.00          | 0.5121                          | 3                 | 12     |
| China              |  | Wangyi, Shaanxi, CH       | CH27 | 0.0590   | 0.33          | 0.0195                   | 1          | 4        | 0.4397   | 0.92          | 0.4030                          | 2                 | 11     |
| China              |  | Maiji, Gansu, CH          | CH28 | 0.0393   | 0.42          | 0.0165                   | 1          | 5        | 0.5060   | 1.00          | 0.5060                          | 3                 | 12     |
| China              |  | Zhenba, Shaanxi, CH       | CH29 | 0.0968   | 0.67          | 0.0649                   | 1          | 8        | 0.4976   | 0.92          | 0.4562                          | 2                 | 11     |
| China              |  | Tewo, Gansu, CH           | CH30 | 0.0124   | 0.17          | 0.0021                   | 0          | 2        | 0.6640   | 1.00          | 0.6640                          | 3                 | 12     |
| China              |  | Jiuzhi,Qinghai, CH        | CH31 | 0.0004   | 0.08          | 0.0000                   | 0          | 1        | 0.6432   | 1.00          | 0.6432                          | 3                 | 12     |
| China              |  | Wudu, Gansu, CH           | CH32 | 0.0775   | 0.33          | 0.0256                   | 1          | 4        | 0.5256   | 1.00          | 0.5256                          | 3                 | 12     |
| China              |  | Jiulong,Sichuan, CH       | CH33 | 0.1510   | 0.50          | 0.0755                   | 1          | 6        | 0.7474   | 1.00          | 0.7474                          | 4                 | 12     |
| China              |  | Xinlong, Sichuan, CH      | CH34 | 0.0012   | 0.08          | 0.0001                   | 0          | 1        | 0.6911   | 1.00          | 0.6911                          | 3                 | 12     |
| China              |  | Yanyuan, Sichuan, CH      | CH35 | 0.1325   | 0.50          | 0.0662                   | 1          | 6        | 0.5201   | 1.00          | 0.5201                          | 3                 | 12     |
| China              |  | Huize, Yunnan, CH         | CH36 | 0.1017   | 0.50          | 0.0508                   | 1          | 6        | 0.4360   | 1.00          | 0.4360                          | 2                 | 12     |
| China              |  | Jinsha, Guizhou, CH       | CH37 | 0.1709   | 0.83          | 0.1419                   | 2          | 10       | 0.4048   | 0.83          | 0.3374                          | 2                 | 10     |
| China              |  | Mohe, Heilongjiang, CH    | CH38 | 0.0659   | 0.42          | 0.0277                   | 1          | 5        | 0.3088   | 0.75          | 0.2316                          | 1                 | 9      |
| China              |  | Jianning, Fujian, CH      | CH39 | 0.1763   | 0.58          | 0.1023                   | 2          | 7        | 0.3227   | 0.75          | 0.2420                          | 1                 | 9      |
| China              |  | Yuxian, Yunnan, CH        | CH40 | 0.1159   | 0.67          | 0.0776                   | 1          | 8        | 0.2181   | 1.00          | 0.2181                          | 1                 | 12     |
| China              |  | Putao 4, Mym              | CH41 | 0.0479   | 0.42          | 0.0201                   | 1          | 5        | 0.1699   | 0.67          | 0.1133                          | 1                 | 8      |

| Region and<br>Country |                                |      | Pgt    |               |            |      |       |        | Barberry      |                   |             |        |  |
|-----------------------|--------------------------------|------|--------|---------------|------------|------|-------|--------|---------------|-------------------|-------------|--------|--|
|                       |                                |      | MINF   | Fav-month     | Favourable | Risk | Month | NHTT   | Fav-month     | Favourable growth | Suitability | Months |  |
| Location              | Code                           | (B)  | (F)    | index (B x F) | score      | (D)  |       | (F)    | index (D x F) | score             |             |        |  |
| China                 | Maizhokunggar, Lhasa, CH       | CH42 | 0      | 0.00          | 0.0000     | 0    | 0     | 0.6350 | 1.00          | 0.6350            | 3           | 12     |  |
| China                 | Dengqen, Tibet, CH             | CH43 | 0      | 0.00          | 0.0000     | 0    | 0     | 0.5243 | 0.92          | 0.4806            | 2           | 11     |  |
| China                 | Sunan, Gansu, CH               | CH44 | 0      | 0.00          | 0.0000     | 0    | 0     | 0.5336 | 1.00          | 0.5336            | 3           | 12     |  |
| China                 | Tahe, Heilongjiang, CH         | CH45 | 0.0597 | 0.42          | 0.0251     | 1    | 5     | 0.2928 | 0.75          | 0.2196            | 1           | 9      |  |
| China                 | Yakeshi, Inner Mongolis, CH    | CH46 | 0.0207 | 0.25          | 0.0052     | 0    | 3     | 0.3222 | 0.75          | 0.2416            | 1           | 9      |  |
| China                 | Jinshantun, Heilongjiang, CH   | CH47 | 0.0314 | 0.33          | 0.0103     | 1    | 4     | 0.3021 | 0.75          | 0.2265            | 1           | 9      |  |
| China                 | Zalantun, Inner Mongolia, CH   | CH48 | 0.0081 | 0.25          | 0.0020     | 0    | 3     | 0.3324 | 0.83          | 0.2770            | 1           | 10     |  |
| China                 | Zamtang, Sicuana, CH           | CH49 | 0.0008 | 0.08          | 0.0001     | 0    | 1     | 0.7225 | 1.00          | 0.7225            | 4           | 12     |  |
| China                 | Wuxi, Chongqing, CH            | CH50 | 0.0751 | 0.58          | 0.0435     | 1    | 7     | 0.5251 | 1.00          | 0.5251            | 3           | 12     |  |
| China                 | Yongding, Huanan, CH           | CH51 | 0.1895 | 0.75          | 0.1421     | 2    | 9     | 0.4483 | 0.83          | 0.3736            | 2           | 10     |  |
| China                 | Xiushui, Jiangxi, CH           | CH52 | 0.1439 | 0.75          | 0.1079     | 2    | 9     | 0.3961 | 0.75          | 0.2971            | 1           | 9      |  |
| China                 | Yingde, Guangdong, CH          | CH53 | 0.1633 | 0.75          | 0.1225     | 2    | 9     | 0.2245 | 0.67          | 0.1497            | 1           | 8      |  |
| China                 | Tian'e, Guangxi, CH            | CH54 | 0.1505 | 0.75          | 0.1129     | 2    | 9     | 0.2829 | 0.75          | 0.2121            | 1           | 9      |  |
| China                 | Baiyu, Sichuan, CH             | CH55 | 0.0050 | 0.08          | 0.0004     | 0    | 1     | 0.6821 | 1.00          | 0.6821            | 3           | 12     |  |
| China                 | Alxa Zuoqi, Inner Mongolia, CH | CH56 | 0.0200 | 0.25          | 0.0050     | 0    | 3     | 0.3652 | 1.00          | 0.3652            | 2           | 12     |  |
| China                 | Biru, Tibet, CH                | CH57 | 0      | 0.00          | 0.0000     | 0    | 0     | 0.5826 | 1.00          | 0.5826            | 3           | 12     |  |
| China                 | Nagqu 1, Tibet, CH             | CH58 | 0      | 0.00          | 0.0000     | 0    | 0     | 0.5374 | 1.00          | 0.5374            | 3           | 12     |  |
| China                 | Nagqu 2, Tibet, CH             | CH59 | 0      | 0.00          | 0.0000     | 0    | 0     | 0.5519 | 1.00          | 0.5519            | 3           | 12     |  |
| China                 | Gyaca 1, Tibet, CH             | CH60 | 0.0023 | 0.08          | 0.0002     | 0    | 1     | 0.7335 | 1.00          | 0.7335            | 4           | 12     |  |
| China                 | Nangxian, Tibet, CH            | CH61 | 0.1165 | 0.25          | 0.0291     | 1    | 3     | 0.8627 | 1.00          | 0.8627            | 4           | 12     |  |
| China                 | Jiulong, Sichuan, CH           | CH62 | 0.1165 | 0.25          | 0.0291     | 1    | 3     | 0.8627 | 1.00          | 0.8627            | 4           | 12     |  |
| China                 | Wenxian, Gansu, CH             | CH63 | 0.1186 | 0.25          | 0.0296     | 1    | 3     | 0.5599 | 1.00          | 0.5599            | 3           | 12     |  |
| China                 | Wenchuan, Sichuan, CH          | CH64 | 0.1020 | 0.50          | 0.0510     | 1    | 6     | 0.7178 | 1.00          | 0.7178            | 4           | 12     |  |
| China                 | Barkam, Sichuan, CH            | CH65 | 0.1926 | 0.42          | 0.0809     | 1    | 5     | 0.7414 | 1.00          | 0.7414            | 4           | 12     |  |
| China                 | Hongya, Sichuan,CH             | CH66 | 0      | 0.00          | 0.0000     | 0    | 0     | 0.4796 | 0.83          | 0.3997            | 2           | 10     |  |
| China                 | Hanyuan, Sichuan, CH           | CH67 | 0.4291 | 0.83          | 0.3561     | 3    | 10    | 0.7172 | 1.00          | 0.7172            | 4           | 12     |  |
| China                 | Butuo 1, Sichuan, CH           | CH68 | 0.2307 | 0.42          | 0.0969     | 1    | 5     | 0.8320 | 1.00          | 0.8320            | 4           | 12     |  |
| China                 | Butuo 2, Sichuan, CH           | CH69 | 0.0684 | 0.25          | 0.0171     | 1    | 3     | 0.5108 | 1.00          | 0.5108            | 3           | 12     |  |
| China                 | Muchuan, Sichuan, CH           | CH70 | 0.1497 | 0.50          | 0.0748     | 1    | 6     | 0.4639 | 0.83          | 0.3866            | 2           | 10     |  |

| Region and Country |                         | Location | Code   | Pgt      |               |                          |            | Barberry |          |               |                                 |                   |
|--------------------|-------------------------|----------|--------|----------|---------------|--------------------------|------------|----------|----------|---------------|---------------------------------|-------------------|
|                    |                         |          |        | MINF (B) | Fav-month (F) | Favourable index (B x F) | Risk score | Month    | NHTT (D) | Fav-month (F) | Favourable growth index (D x F) | Suitability score |
| China              | Leibo, Sichuan, CH      | CH71     | 0.3722 | 0.75     | 0.2791        | 2                        | 9          | 0.4692   | 1.00     | 0.4692        | 2                               | 12                |
| China              | Luquan, Yunnan, CH      | CH72     | 0.3384 | 0.58     | 0.1963        | 2                        | 7          | 0.3593   | 1.00     | 0.3593        | 2                               | 12                |
| China              | Lanping, Yunnan, CH     | CH73     | 0.0704 | 0.58     | 0.0408        | 1                        | 7          | 0.5882   | 1.00     | 0.5882        | 3                               | 12                |
| China              | Huili, Sichuan, CH      | CH74     | 0.2310 | 0.50     | 0.1155        | 2                        | 6          | 0.3969   | 1.00     | 0.3969        | 2                               | 12                |
| China              | Dayao, Yunnan, CH       | CH75     | 0.1093 | 0.58     | 0.0634        | 1                        | 7          | 0.3661   | 1.00     | 0.3661        | 2                               | 12                |
| China              | Mainling, Tibet, CH     | CH76     | 0.1010 | 0.58     | 0.0586        | 1                        | 7          | 0.8574   | 1.00     | 0.8574        | 4                               | 12                |
| China              | Jinchuan, Sichuan, CH   | CH77     | 0.1272 | 0.33     | 0.0420        | 1                        | 4          | 0.7737   | 1.00     | 0.7737        | 4                               | 12                |
| China              | Zhuanglang, Gansu, CH   | CH78     | 0.0128 | 0.17     | 0.0022        | 0                        | 2          | 0.4913   | 1.00     | 0.4913        | 2                               | 12                |
| China              | Zhenyuan, Gansu, CH     | CH79     | 0.0320 | 0.42     | 0.0135        | 1                        | 5          | 0.4552   | 1.00     | 0.4552        | 2                               | 12                |
| China              | Dingbian, Shaanxi, CH   | CH80     | 0.0479 | 0.25     | 0.0120        | 1                        | 3          | 0.4254   | 1.00     | 0.4254        | 2                               | 12                |
| China              | Qilian, Qinghai, CH     | CH81     | 0.0057 | 0.08     | 0.0005        | 0                        | 1          | 0.4420   | 0.92     | 0.4052        | 2                               | 11                |
| China              | Nanbu, Sichuan, CH      | CH82     | 0.1385 | 0.58     | 0.0803        | 1                        | 7          | 0.3922   | 0.75     | 0.2941        | 1                               | 9                 |
| China              | Ulan 2, Qinghai, CH     | CH83     | 0.0008 | 0.08     | 0.0001        | 0                        | 1          | 0.5257   | 0.92     | 0.4819        | 2                               | 11                |
| China              | Jomdo, Tibet, CH        | CH84     | 0      | 0.00     | 0.0000        | 0                        | 0          | 0.6230   | 1.00     | 0.6230        | 3                               | 12                |
| China              | Wenchuan 2, Sichuan, CH | CH85     | 0.3032 | 0.42     | 0.1274        | 2                        | 5          | 0.6629   | 1.00     | 0.6629        | 3                               | 12                |
| China              | Pengzhou, Sichuan, CH   | CH86     | 0.4660 | 0.67     | 0.3122        | 3                        | 8          | 0.5667   | 1.00     | 0.5667        | 3                               | 12                |
| China              | Mianzhu, Sichuan, CH    | CH87     | 0.3231 | 0.67     | 0.2165        | 2                        | 8          | 0.4599   | 0.83     | 0.3832        | 2                               | 10                |
| China              | Pingshan 2, Sichuan, CH | CH88     | 0.2702 | 0.75     | 0.2026        | 2                        | 9          | 0.3755   | 0.75     | 0.2816        | 1                               | 9                 |
| China              | Suijiang 2, Yunnan, CH  | CH89     | 0.3722 | 0.75     | 0.2791        | 2                        | 9          | 0.4639   | 0.83     | 0.3866        | 2                               | 10                |
| China              | Shuifu, Yunan, CH       | CH90     | 0.3170 | 0.75     | 0.2377        | 2                        | 9          | 0.4133   | 0.83     | 0.3444        | 2                               | 10                |
| China              | Tewo 2, Gansu, CH       | CH91     | 0      | 0.00     | 0.0000        | 0                        | 0          | 0.0087   | 0.25     | 0.0022        | 0                               | 3                 |
| China              | Meigu 2, Sichuan, CH    | CH92     | 0.2844 | 0.58     | 0.1650        | 2                        | 7          | 0.5377   | 1.00     | 0.5377        | 3                               | 12                |
| China              | Ebian, Sichuan, CH      | CH93     | 0.3745 | 0.67     | 0.2509        | 2                        | 8          | 0.5170   | 1.00     | 0.5170        | 3                               | 12                |
| China              | Mabian, Sichuan, CH     | CH94     | 0.2844 | 0.58     | 0.1650        | 2                        | 7          | 0.5377   | 1.00     | 0.5377        | 3                               | 12                |
| China              | Wenchuan 3, Sichuan, CH | CH95     | 0.4200 | 0.58     | 0.2436        | 2                        | 7          | 0.6116   | 1.00     | 0.6116        | 3                               | 12                |
| China              | Ge'gyai, Tibet, CH      | CH96     | 0      | 0.00     | 0.0000        | 0                        | 0          | 0.4316   | 0.83     | 0.3597        | 2                               | 10                |
| China              | Karakax, Xinjiang, CH   | CH97     | 0.0064 | 0.25     | 0.0016        | 0                        | 3          | 0.3295   | 0.83     | 0.2746        | 1                               | 10                |
| China              | Hoboksar, Xinjiang, CH  | CH98     | 0.0284 | 0.25     | 0.0071        | 0                        | 3          | 0.2961   | 0.92     | 0.2714        | 1                               | 11                |
| China              | Hejing, Xinjiang, CH    | CH99     | 0.0021 | 0.08     | 0.0002        | 0                        | 1          | 0.5265   | 0.92     | 0.4827        | 2                               | 11                |

| Region and Country |                                     | Location | Code   | Pgt  |           |               |       | Barberry |           |                   |             |        |
|--------------------|-------------------------------------|----------|--------|------|-----------|---------------|-------|----------|-----------|-------------------|-------------|--------|
|                    |                                     |          |        | MINF | Fav-month | Favourable    | Risk  | NHTT     | Fav-month | Favourable growth | Suitability | Months |
|                    |                                     |          |        | (B)  | (F)       | index (B x F) | score | (D)      | (F)       | index (D x F)     | score       |        |
| China              | Kumul, Xinjiang, CH                 | CH100    | 0.0041 | 0.25 | 0.0010    | 0             | 3     | 0.3592   | 0.92      | 0.3293            | 2           | 11     |
| China              | Ruoqiang, Xinjiang, CH              | CH101    | 0.0092 | 0.08 | 0.0007    | 0             | 1     | 0.5544   | 1.00      | 0.5544            | 3           | 12     |
| China              | Zhidoi, Qinghai, CH                 | CH102    | 0      | 0.00 | 0.0000    | 0             | 0     | 0.3841   | 0.75      | 0.2881            | 1           | 9      |
| China              | Shuanghu, Tibet, CH                 | CH103    | 0.0019 | 0.08 | 0.0002    | 0             | 1     | 0.5076   | 0.92      | 0.4653            | 2           | 11     |
| China              | Zhengxiangbaiqi, Inner Mongolia, CH | CH104    | 0.0037 | 0.17 | 0.0006    | 0             | 2     | 0.3340   | 1.00      | 0.3340            | 2           | 12     |
| China              | Urad Houqi, Inner Mongolia, CH      | CH105    | 0.0079 | 0.17 | 0.0013    | 0             | 2     | 0.3531   | 1.00      | 0.3531            | 2           | 12     |
| China              | Aba, Sichuan, CH                    | CH106    | 0.0409 | 0.25 | 0.0102    | 1             | 3     | 0.6079   | 1.00      | 0.6079            | 3           | 12     |
| China              | Baoji2, Shaanxi, CH                 | CH107    | 0.1465 | 0.42 | 0.0615    | 1             | 5     | 0.4017   | 1.00      | 0.4017            | 2           | 12     |
| China              | Bazhong, Sichuan, CH                | CH108    | 0.2204 | 0.67 | 0.1477    | 2             | 8     | 0.3541   | 0.75      | 0.2656            | 1           | 9      |
| China              | Chengxian, Gansu, CH                | CH109    | 0.1100 | 0.42 | 0.0462    | 1             | 5     | 0.4139   | 1.00      | 0.4139            | 2           | 12     |
| China              | Dali, Yunan, CH                     | CH110    | 0.1224 | 0.33 | 0.0404    | 1             | 4     | 0.3260   | 1.00      | 0.3260            | 2           | 12     |
| China              | Degen, Yunan, CH                    | CH111    | 0.0831 | 0.42 | 0.0349    | 1             | 5     | 0.1729   | 1.00      | 0.1729            | 1           | 12     |
| China              | Deyang, Sichuan, CH                 | CH112    | 0.3648 | 0.67 | 0.2444    | 2             | 8     | 0.3685   | 0.83      | 0.3071            | 2           | 10     |
| China              | Dinxi, Gansu, CH                    | CH113    | 0.0564 | 0.33 | 0.0186    | 1             | 4     | 0.3891   | 1.00      | 0.3891            | 2           | 12     |
| China              | Fengxian, Shaanxi, CH               | CH114    | 0.1519 | 0.42 | 0.0638    | 1             | 5     | 0.4227   | 1.00      | 0.4227            | 2           | 12     |
| China              | Gnagu, Gansu, CH                    | CH115    | 0.0789 | 0.33 | 0.0261    | 1             | 4     | 0.4088   | 1.00      | 0.4088            | 2           | 12     |
| China              | Gannan, Gansu, CH                   | CH116    | 0.0383 | 0.25 | 0.0096    | 1             | 3     | 0.3862   | 1.00      | 0.3862            | 2           | 12     |
| China              | Ganzi, Sichuan, CH                  | CH117    | 0.0838 | 0.25 | 0.0210    | 1             | 3     | 0.6355   | 1.00      | 0.6355            | 3           | 12     |
| China              | Guangyuan, Sichuan, CH              | CH118    | 0.2229 | 0.67 | 0.1494    | 2             | 8     | 0.3814   | 0.83      | 0.3178            | 2           | 10     |
| China              | Haixi, Qinghai, CH                  | CH119    | 0.0093 | 0.08 | 0.0007    | 0             | 1     | 0.4121   | 1.00      | 0.4121            | 2           | 12     |
| China              | Hanzong, Shaanxi, CH                | CH120    | 0      | 0.00 | 0.0000    | 0             | 0     | 0.6982   | 1.00      | 0.6982            | 3           | 12     |
| China              | Huixian, Gansu, CH                  | CH121    | 0.1208 | 0.33 | 0.0399    | 1             | 4     | 0.4152   | 1.00      | 0.4152            | 2           | 12     |
| China              | Lueyang, Shaanxi, CH                | CH122    | 0.1220 | 0.42 | 0.0513    | 1             | 5     | 0.3826   | 1.00      | 0.3826            | 2           | 12     |
| China              | Kunming, Yunan, CH                  | CH123    | 0.0539 | 0.42 | 0.0226    | 1             | 5     | 0.2525   | 1.00      | 0.2525            | 1           | 12     |
| China              | Lanzhou, Gansu, CH                  | CH124    | 0.0383 | 0.25 | 0.0096    | 1             | 3     | 0.3862   | 1.00      | 0.3862            | 2           | 12     |
| China              | Linagdang, Gansu, CH                | CH125    | 0.1208 | 0.33 | 0.0399    | 1             | 4     | 0.4152   | 1.00      | 0.4152            | 2           | 12     |
| China              | Liangshun, Sichuan, CH              | CH126    | 0.1594 | 0.33 | 0.0526    | 1             | 4     | 0.4017   | 1.00      | 0.4017            | 2           | 12     |
| China              | Lijiang, Yunan, CH                  | CH127    | 0.1333 | 0.25 | 0.0333    | 1             | 3     | 0.4059   | 1.00      | 0.4059            | 2           | 12     |
| China              | Linxia, Gansu, CH                   | CH128    | 0.0599 | 0.33 | 0.0198    | 1             | 4     | 0.4227   | 1.00      | 0.4227            | 2           | 12     |

| Region and Country |                                          | Location | Code   | Pgt      |               |                          |            | Barberry |          |               |                                 |                   |
|--------------------|------------------------------------------|----------|--------|----------|---------------|--------------------------|------------|----------|----------|---------------|---------------------------------|-------------------|
|                    |                                          |          |        | MINF (B) | Fav-month (F) | Favourable index (B x F) | Risk score | Month    | NHTT (D) | Fav-month (F) | Favourable growth index (D x F) | Suitability score |
| China              | Lixian, Gansu, CH                        | CH129    | 0.0789 | 0.33     | 0.0261        | 1                        | 4          | 0.4088   | 1.00     | 0.4088        | 2                               | 12                |
| China              | Longnan, Gansu, CH                       | CH130    | 0.1906 | 0.42     | 0.0800        | 1                        | 5          | 0.4565   | 1.00     | 0.4565        | 2                               | 12                |
| China              | Maijigen, Gansu, CH                      | CH131    | 0.1098 | 0.42     | 0.0461        | 1                        | 5          | 0.4125   | 1.00     | 0.4125        | 2                               | 12                |
| China              | Mianyang, Sichuan, CH                    | CH132    | 0.2308 | 0.67     | 0.1546        | 2                        | 8          | 0.3176   | 0.75     | 0.2382        | 1                               | 9                 |
| China              | Panlogjhen, Shaanxi, CH                  | CH133    | 0.1465 | 0.42     | 0.0615        | 1                        | 5          | 0.4017   | 1.00     | 0.4017        | 2                               | 12                |
| China              | Panzihua, Sichuan, CH                    | CH134    | 0.1186 | 0.33     | 0.0391        | 1                        | 4          | 0.2760   | 1.00     | 0.2760        | 1                               | 12                |
| China              | Qiangyang2, Sichuan, CH                  | CH135    | 0.1220 | 0.42     | 0.0513        | 1                        | 5          | 0.3826   | 1.00     | 0.3826        | 2                               | 12                |
| China              | Qingshui, Gansu, CH                      | CH136    | 0.1071 | 0.42     | 0.0450        | 1                        | 5          | 0.4110   | 1.00     | 0.4110        | 2                               | 12                |
| China              | Shannan, Tibet, CH                       | CH137    | 0.0018 | 0.08     | 0.0001        | 0                        | 1          | 0.5908   | 1.00     | 0.5908        | 3                               | 12                |
| China              | Taibai2, Shaanxi, CH                     | CH138    | 0.1465 | 0.42     | 0.0615        | 1                        | 5          | 0.4017   | 1.00     | 0.4017        | 2                               | 12                |
| China              | Tianshui, Gansu, CH                      | CH139    | 0.0810 | 0.33     | 0.0267        | 1                        | 4          | 0.4011   | 1.00     | 0.4011        | 2                               | 12                |
| China              | Wangchuamjen, Gansu, CH                  | CH140    | 0.0965 | 0.33     | 0.0318        | 1                        | 4          | 0.4081   | 1.00     | 0.4081        | 2                               | 12                |
| China              | Yaan, Sichuan, CH                        | CH141    | 0.5424 | 0.58     | 0.3146        | 3                        | 7          | 0.4379   | 1.00     | 0.4379        | 2                               | 12                |
| China              | Yuxi, Yunan                              | CH142    | 0.0504 | 0.42     | 0.0212        | 1                        | 5          | 0.1724   | 1.00     | 0.1724        | 1                               | 12                |
| India              | Deema Range, Uttarakhand, IN             | IN1      | 0.0872 | 0.33     | 0.0288        | 1                        | 4          | 0.0004   | 0.00     | 0.0000        | 0                               | 0                 |
| India              | Champawat,UK                             | IN2      | 0.1299 | 0.33     | 0.0429        | 1                        | 4          | 0.2256   | 0.75     | 0.1692        | 1                               | 9                 |
| India              | Lunglei, Mizoram,IN                      | IN3      | 0.1565 | 0.42     | 0.0657        | 1                        | 5          | 0.0001   | 0.00     | 0.0000        | 0                               | 0                 |
| India              | Devidhura Range, Uttarakhand, IN         | IN4      | 0.1011 | 0.33     | 0.0334        | 1                        | 4          | 0.1073   | 0.58     | 0.0626        | 0                               | 7                 |
| India              | Kheti, Uttarakhand, IN                   | IN5      | 0.2017 | 0.25     | 0.0504        | 1                        | 3          | 0.4445   | 1.00     | 0.4445        | 2                               | 12                |
| India              | Birgola, Uttarakhand, IN                 | IN6      | 0.1352 | 0.33     | 0.0446        | 1                        | 4          | 0.1454   | 0.58     | 0.0848        | 0                               | 7                 |
| India              | Dharkot, Uttarakhand, IN                 | IN7      | 0.1403 | 0.17     | 0.0239        | 1                        | 2          | 0.4967   | 1.00     | 0.4967        | 2                               | 12                |
| India              | DPF Nanhani, Himachal Pradesh, IN        | IN8      | 0.2034 | 0.25     | 0.0508        | 1                        | 3          | 0.6364   | 1.00     | 0.6364        | 3                               | 12                |
| India              | Bahru, Himachal Pradesh, IN              | IN9      | 0.0996 | 0.33     | 0.0329        | 1                        | 4          | 0.3148   | 0.75     | 0.2361        | 1                               | 9                 |
| India              | Chamba HP, IN                            | IN10     | 0.0785 | 0.50     | 0.0393        | 1                        | 6          | 0.3786   | 0.92     | 0.3471        | 2                               | 11                |
| India              | Lad Bharol HP, IN                        | IN11     | 0.0996 | 0.33     | 0.0329        | 1                        | 4          | 0.3148   | 0.75     | 0.2361        | 1                               | 9                 |
| India              | Latti, Jammu and Kashmir, IN             | IN12     | 0.0924 | 0.25     | 0.0231        | 1                        | 3          | 0.2198   | 0.58     | 0.1282        | 1                               | 7                 |
| India              | Nar Sher Ali Khan, Jammu and Kashmir, IN | IN13     | 0.0457 | 0.25     | 0.0114        | 1                        | 3          | 0.3483   | 0.75     | 0.2613        | 1                               | 9                 |
| India              | Bandipora, Jammu and Kashmir, IN         | IN14     | 0.0168 | 0.25     | 0.0042        | 0                        | 3          | 0.5941   | 1.00     | 0.5941        | 3                               | 12                |
| India              | Shimla, Himachal Pradesh, IN             | IN15     | 0.1720 | 0.17     | 0.0292        | 1                        | 2          | 0.6135   | 1.00     | 0.6135        | 3                               | 12                |

| Region and Country |                                    | Location | Code   | Pgt      |               |                          |            |        | Barberry |               |                                 |                   |        |
|--------------------|------------------------------------|----------|--------|----------|---------------|--------------------------|------------|--------|----------|---------------|---------------------------------|-------------------|--------|
|                    |                                    |          |        | MINF (B) | Fav-month (F) | Favourable index (B x F) | Risk score | Month  | NHTT (D) | Fav-month (F) | Favourable growth index (D x F) | Suitability score | Months |
| India              | Rupal, Jammu and Kashmir, IN       | IN16     | 0.0007 | 0.08     | 0.0001        | 0                        | 1          | 0.5487 | 0.92     | 0.5030        | 3                               | 11                |        |
| India              | Sankoo, Jammu and Kashmir, IN      | IN17     | 0      | 0.00     | 0.0000        | 0                        | 0          | 0.5509 | 0.83     | 0.4590        | 2                               | 10                |        |
| India              | Magh Batna, Jammu and Kashmir, IN  | IN18     | 0.0309 | 0.33     | 0.0102        | 1                        | 4          | 0.6180 | 1.00     | 0.6180        | 3                               | 12                |        |
| India              | Khawaspur, Punjab, IN              | IN19     | 0.0472 | 0.25     | 0.0118        | 1                        | 3          | 0.0818 | 0.42     | 0.0341        | 0                               | 5                 |        |
| India              | Dharm Manela, Himachal Pradesh, IN | IN20     | 0.0759 | 0.08     | 0.0061        | 0                        | 1          | 0.6039 | 0.92     | 0.5536        | 3                               | 11                |        |
| India              | Jamaga, Karnataka, IN              | IN21     | 0.2636 | 0.33     | 0.0870        | 1                        | 4          | 0.0052 | 0.33     | 0.0017        | 0                               | 4                 |        |
| India              | Waynad, Kerala, IN                 | IN22     | 0.4274 | 0.42     | 0.1795        | 2                        | 5          | 0.0053 | 0.33     | 0.0018        | 0                               | 4                 |        |
| India              | Thanjavur, Tamil Nadu, IN          | IN23     | 0.0358 | 0.25     | 0.0089        | 1                        | 3          | 0.0002 | 0.00     | 0.0000        | 0                               | 0                 |        |
| India              | Mendpal, Chhattisgarh, IN          | IN24     | 0.1618 | 0.25     | 0.0404        | 1                        | 3          | 0.0196 | 0.42     | 0.0082        | 0                               | 5                 |        |
| India              | Basnara, Chhattisgarh, IN          | IN25     | 0.0989 | 0.25     | 0.0247        | 1                        | 3          | 0.0440 | 0.50     | 0.0220        | 0                               | 6                 |        |
| India              | Adiwas, Rajasthan, IN              | IN26     | 0.0079 | 0.08     | 0.0006        | 0                        | 1          | 0.0293 | 0.42     | 0.0122        | 0                               | 5                 |        |
| India              | Khesari Gidha, Uttar Pradesh, IN   | IN27     | 0.0526 | 0.17     | 0.0089        | 1                        | 2          | 0.0644 | 0.42     | 0.0269        | 0                               | 5                 |        |
| India              | Nandhaur Range, Uttarakhand, IN    | IN28     | 0.1011 | 0.33     | 0.0334        | 1                        | 4          | 0.1073 | 0.58     | 0.0626        | 0                               | 7                 |        |
| India              | Deema Range, Uttarakhand, IN       | IN29     | 0.0872 | 0.33     | 0.0288        | 1                        | 4          | 0.1116 | 0.58     | 0.0651        | 0                               | 7                 |        |
| India              | Bahru, Himachal Pradesh, IN        | IN30     | 0.0996 | 0.33     | 0.0329        | 1                        | 4          | 0.3148 | 0.75     | 0.2361        | 1                               | 9                 |        |
| India              | Bahl, Himachal Pradesh, IN         | IN31     | 0.0768 | 0.25     | 0.0192        | 1                        | 3          | 0.1429 | 0.58     | 0.0833        | 0                               | 7                 |        |
| India              | Golaghat, Assam, IN                | IN32     | 0.0714 | 0.58     | 0.0414        | 1                        | 7          | 0.0393 | 0.42     | 0.0164        | 0                               | 5                 |        |
| India              | Mokokchung, Nagaland, IN           | IN33     | 0.0398 | 0.58     | 0.0231        | 1                        | 7          | 0.0576 | 0.58     | 0.0336        | 0                               | 7                 |        |
| India              | Nagrasari, Rajasthan, IN           | IN34     | 0      | 0.00     | 0.0000        | 0                        | 0          | 0.0755 | 0.42     | 0.0315        | 0                               | 5                 |        |
| India              | Jind, Haryana, IN                  | IN35     | 0      | 0.00     | 0.0000        | 0                        | 0          | 0.0955 | 0.42     | 0.0398        | 0                               | 5                 |        |
| India              | Thirpali Chhoti, Rajasthan, IN     | IN36     | 0      | 0.00     | 0.0000        | 0                        | 0          | 0.0768 | 0.42     | 0.0320        | 0                               | 5                 |        |
| India              | Roranwala Urf Tarewali, Punjab     | IN37     | 0      | 0.00     | 0.0000        | 0                        | 0          | 0.0930 | 0.42     | 0.0388        | 0                               | 5                 |        |
| India              | Gulbarga, Karnataka, IN            | IN38     | 0.0578 | 0.25     | 0.0144        | 1                        | 3          | 0.0070 | 0.33     | 0.0023        | 0                               | 4                 |        |
| India              | Poletipalle, Andhra Pradesh, IN    | IN39     | 0.0098 | 0.33     | 0.0032        | 0                        | 4          | 0.0044 | 0.33     | 0.0015        | 0                               | 4                 |        |
| India              | Marma, Maharashtra, IN             | IN40     | 0      | 0.00     | 0.0000        | 0                        | 0          | 0.0159 | 0.42     | 0.0066        | 0                               | 5                 |        |
| India              | Kaimur, Bihar, IN                  | IN41     | 0      | 0.00     | 0.0000        | 0                        | 0          | 0.0493 | 0.50     | 0.0246        | 0                               | 6                 |        |
| India              | Karbi Anglog, Assam, IN            | IN42     | 0.0501 | 0.58     | 0.0291        | 1                        | 7          | 0.0328 | 0.42     | 0.0137        | 0                               | 5                 |        |
| India              | Champai, Mizoram, IN               | IN43     | 0.0284 | 0.33     | 0.0094        | 1                        | 4          | 0.0576 | 0.58     | 0.0336        | 0                               | 7                 |        |
| India              | Serchhip, Mizoram, IN              | IN44     | 0.1212 | 0.42     | 0.0509        | 1                        | 5          | 0.0364 | 0.42     | 0.0152        | 0                               | 5                 |        |

| Region and<br>Country | Location                      | Code | Pgt         |                  |                             |               |       | Barberry    |                  |                                    |                      |        |
|-----------------------|-------------------------------|------|-------------|------------------|-----------------------------|---------------|-------|-------------|------------------|------------------------------------|----------------------|--------|
|                       |                               |      | MINF<br>(B) | Fav-month<br>(F) | Favourable<br>index (B x F) | Risk<br>score | Month | NHTT<br>(D) | Fav-month<br>(F) | Favourable growth<br>index (D x F) | Suitability<br>score | Months |
| India                 | Baljata, J&K, IN              | IN45 | 0.0717      | 0.17             | 0.0122                      | 1             | 2     | 0.1267      | 0.58             | 0.0739                             | 0                    | 7      |
| Mongolia              | Unnamed, Lamaiin Huryee, MN   | MN1  | 0.0031      | 0.08             | 0.0002                      | 0             | 1     | 0.3531      | 1.00             | 0.3531                             | 2                    | 12     |
| Mongolia              | Unnamed, Khurmen, MN          | MN2  | 0.0033      | 0.08             | 0.0003                      | 0             | 1     | 0.3262      | 1.00             | 0.3262                             | 2                    | 12     |
| Mongolia              | Unnamed, Shinejinst, MN       | MN3  | 0.0023      | 0.25             | 0.0006                      | 0             | 3     | 0.3230      | 1.00             | 0.3230                             | 2                    | 12     |
| Mongolia              | Unnamed, Munkhkhairkhan, MN   | MN4  | 0.0005      | 0.08             | 0.0000                      | 0             | 1     | 0.4476      | 0.75             | 0.3357                             | 2                    | 9      |
| Mongolia              | Unnamed, Tsagaankhairkhan, MN | MN5  | 0.0186      | 0.25             | 0.0046                      | 0             | 3     | 0.3573      | 0.83             | 0.2978                             | 1                    | 10     |
| Mongolia              | Unnamed, Orkhon, MN           | MN6  | 0.0221      | 0.17             | 0.0038                      | 0             | 2     | 0.3732      | 0.83             | 0.3109                             | 2                    | 10     |
| Mongolia              | Unnamed, Dashbalbar, MN       | MN7  | 0.0091      | 0.25             | 0.0023                      | 0             | 3     | 0.3200      | 0.83             | 0.2667                             | 1                    | 10     |
| Mongolia              | Unnamed, Matad, MN            | MN8  | 0.0014      | 0.17             | 0.0002                      | 0             | 2     | 0.3086      | 0.83             | 0.2571                             | 1                    | 10     |
| Mongolia              | Unnamed, Luus, MN             | MN9  | 0.0037      | 0.08             | 0.0003                      | 0             | 1     | 0.3349      | 0.83             | 0.2791                             | 1                    | 10     |
| Mongolia              | Unnamed, Khuvs gul, MN        | MN10 | 0.0055      | 0.17             | 0.0009                      | 0             | 2     | 0.3158      | 1.00             | 0.3158                             | 2                    | 12     |
| Myanmar               | Sagaing Region 1, Mym         | MYN1 | 0           | 0.00             | 0.0000                      | 0             | 0     | 0.0249      | 0.42             | 0.0104                             | 0                    | 5      |
| Myanmar               | Kyaukme, Mym                  | MYN2 | 0.0016      | 0.17             | 0.0003                      | 0             | 2     | 0.0511      | 0.50             | 0.0256                             | 0                    | 6      |
| Myanmar               | Mindat, Mym                   | MYN3 | 0.0008      | 0.08             | 0.0001                      | 0             | 1     | 0.0360      | 0.42             | 0.0150                             | 0                    | 5      |
| Myanmar               | Kyaukpyu, Mym                 | MYN4 | 0           | 0.00             | 0.0000                      | 0             | 0     | 0.0066      | 0.25             | 0.0017                             | 0                    | 3      |
| Myanmar               | Rakhine, Mym                  | MYN5 | 0           | 0.00             | 0.0000                      | 0             | 0     | 0.0004      | 0.00             | 0.0000                             | 0                    | 0      |
| Myanmar               | Putao 1, Mym                  | MYN6 | 0.0356      | 0.42             | 0.0150                      | 1             | 5     | 0.1146      | 0.58             | 0.0669                             | 0                    | 7      |
| Myanmar               | Bhamo, Mym                    | MYN7 | 0.0049      | 0.25             | 0.0012                      | 0             | 3     | 0.0270      | 0.42             | 0.0113                             | 0                    | 5      |
| Myanmar               | Sagaing Region 2, Mym         | MYN8 | 0           | 0.00             | 0.0000                      | 0             | 0     | 0.0080      | 0.25             | 0.0020                             | 0                    | 3      |
| Nepal                 | Guthichaur, NP                | NP1  | 0.2230      | 0.25             | 0.0557                      | 1             | 3     | 0.7477      | 1.00             | 0.7477                             | 4                    | 12     |
| Nepal                 | Namarjung, NP                 | NP2  | 0.3787      | 0.25             | 0.0947                      | 1             | 3     | 0.5182      | 1.00             | 0.5182                             | 3                    | 12     |
| Nepal                 | Maipokhari, NP                | NP3  | 0.3290      | 0.25             | 0.0822                      | 1             | 3     | 0.3880      | 1.00             | 0.3880                             | 2                    | 12     |
| Nepal                 | Seti, NP                      | NP4  | 0.1350      | 0.25             | 0.0338                      | 1             | 3     | 0.3754      | 1.00             | 0.3754                             | 2                    | 12     |
| Nepal                 | Phopli 1, NP                  | NP5  | 0.1809      | 0.25             | 0.0452                      | 1             | 3     | 0.2569      | 0.83             | 0.2140                             | 1                    | 10     |
| Nepal                 | Phopli 2, NP                  | NP6  | 0.1352      | 0.25             | 0.0338                      | 1             | 3     | 0.1454      | 0.58             | 0.0848                             | 0                    | 7      |
| Nepal                 | Kailali, NP                   | NP7  | 0.0550      | 0.25             | 0.0138                      | 1             | 3     | 0.0668      | 0.50             | 0.0334                             | 0                    | 6      |
| Nepal                 | Bheri, NP                     | NP8  | 0.0503      | 0.25             | 0.0126                      | 1             | 3     | 0.0625      | 0.50             | 0.0313                             | 0                    | 6      |
| Nepal                 | Chitwan, NP                   | NP9  | 0.1964      | 0.25             | 0.0491                      | 1             | 3     | 0.1178      | 0.58             | 0.0687                             | 0                    | 7      |
| Nepal                 | Firfire, NP                   | NP10 | 0.3174      | 0.25             | 0.0793                      | 1             | 3     | 0.4403      | 1.00             | 0.4403                             | 2                    | 12     |

| Region and Country                       |                                    | Location | Code   | Pgt  |           |               |       | Barberry |           |                   |               |       |
|------------------------------------------|------------------------------------|----------|--------|------|-----------|---------------|-------|----------|-----------|-------------------|---------------|-------|
|                                          |                                    |          |        | MINF | Fav-month | Favourable    | Risk  | NHTT     | Fav-month | Favourable growth | Suitability   |       |
|                                          |                                    |          |        | (B)  | (F)       | index (B x F) | score | Month    | (D)       | (F)               | index (D x F) | score |
| Nepal                                    | Huktumba, NP                       | NP11     | 0.1017 | 0.25 | 0.0254    | 1             | 3     | 0.0002   | 0.00      | 0.0000            | 0             | 0     |
| Nepal                                    | Khalanga, NP                       | NP12     | 0.0688 | 0.25 | 0.0172    | 1             | 3     | 0.0625   | 0.50      | 0.0313            | 0             | 6     |
| Nepal                                    | Tilepata, NP                       | NP13     | 0.2327 | 0.25 | 0.0582    | 1             | 3     | 0.5494   | 1.00      | 0.5494            | 3             | 12    |
| Nepal                                    | Khalanga NP                        | NP14     | 0.0503 | 0.25 | 0.0126    | 1             | 3     | 0.1178   | 0.58      | 0.0687            | 0             | 7     |
| Nepal                                    | Malatikot NP                       | NP15     | 0.1678 | 0.25 | 0.0419    | 1             | 3     | 0.5182   | 0.00      | 0.1296            | 3             | 12    |
| Pakistan                                 | Baricot, Khyber Pakhtunkhwa, PK    | PK1      | 0.0442 | 0.50 | 0.0221    | 1             | 6     | 0.4048   | 0.75      | 0.3036            | 2             | 9     |
| Pakistan                                 | Abbottabad, Khyber Pakhtunkhwa, PK | PK2      | 0.0541 | 0.50 | 0.0271    | 1             | 6     | 0.3832   | 0.75      | 0.2874            | 1             | 9     |
| Pakistan                                 | Jand, Punjab, PK                   | PK3      | 0.0729 | 0.17 | 0.0124    | 1             | 2     | 0.1586   | 0.58      | 0.0925            | 0             | 7     |
| Pakistan                                 | Darsmand, Khyber Pakhtunkhwa, PK   | PK4      | 0.0858 | 0.25 | 0.0214    | 1             | 3     | 0.2424   | 0.58      | 0.1414            | 1             | 7     |
| Pakistan                                 | Wana 1, Waziristan, PK             | PK5      | 0.0314 | 0.25 | 0.0078    | 0             | 3     | 0.1905   | 0.58      | 0.1111            | 1             | 7     |
| Pakistan                                 | Qila Saifullah, Balochistan, PK    | PK6      | 0      | 0.00 | 0.0000    | 0             | 0     | 0.4055   | 0.92      | 0.3717            | 2             | 11    |
| Pakistan                                 | Wana 2, Waziristan, PK             | PK7      | 0.0189 | 0.25 | 0.0047    | 0             | 3     | 0.3253   | 0.75      | 0.2440            | 1             | 9     |
| Pakistan                                 | Awaran 1, Balochistan, PK          | PK8      | 0      | 0.00 | 0.0000    | 0             | 0     | 0.0330   | 0.42      | 0.0137            | 0             | 5     |
| Pakistan                                 | Khuzdar, Balochistan, PK           | PK9      | 0.0018 | 0.08 | 0.0001    | 0             | 1     | 0.2397   | 0.67      | 0.1598            | 1             | 8     |
| Pakistan                                 | Sangan, Balochistan, PK            | PK10     | 0.0154 | 0.17 | 0.0026    | 0             | 2     | 0.1701   | 0.58      | 0.0992            | 0             | 7     |
| Pakistan                                 | Kalkot, Khyber Pakhtunkhwa, PK     | PK11     | 0.0401 | 0.25 | 0.0100    | 1             | 3     | 0.5797   | 1.00      | 0.5797            | 3             | 12    |
| Pakistan                                 | Awaran 2, Balochistan, PK          | PK12     | 0      | 0.00 | 0.0000    | 0             | 0     | 0.0821   | 0.42      | 0.0342            | 0             | 5     |
| Pakistan                                 | Mastuj, Khyber Pakhtunkhwa, PK     | PK13     | 0      | 0.00 | 0.0000    | 0             | 0     | 0.5835   | 0.92      | 0.5349            | 3             | 11    |
| Pakistan                                 | Hunza Nagar, PK                    | PK14     | 0      | 0.00 | 0.0000    | 0             | 0     | 0.4345   | 0.58      | 0.2534            | 1             | 7     |
| Pakistan                                 | Alai, Khyber Pakhtunkhwa, PK       | PK15     | 0.0214 | 0.33 | 0.0071    | 0             | 4     | 0.5449   | 1.00      | 0.5449            | 3             | 12    |
| Pakistan                                 | Bara, Khyber Agency, PK            | PK16     | 0.0547 | 0.33 | 0.0181    | 1             | 4     | 0.3645   | 0.75      | 0.2734            | 1             | 9     |
| Proportion of sites with infection index |                                    |          | 0.756  |      |           |               |       |          |           |                   |               |       |
| Central Asia (195)                       |                                    |          |        |      |           |               |       |          | 0.00      |                   |               |       |
| Afghanistan                              | Khas Uruzgan, AFG                  | AFG1     | 0.0023 | 0.08 | 0.0002    | 0             | 1     | 0.5104   | 1.00      | 0.5104            | 3             | 12    |
| Afghanistan                              | Berana, Panjab, AFG                | AFG2     | 0      | 0.00 | 0.0000    | 0             | 0     | 0.5827   | 1.00      | 0.5827            | 3             | 12    |
| Afghanistan                              | Kohistan, AFG                      | AFG3     | 0      | 0.00 | 0.0000    | 0             | 0     | 0.5798   | 1.00      | 0.5798            | 3             | 12    |
| Afghanistan                              | Balkh, AFG                         | AFG4     | 0.0058 | 0.25 | 0.0015    | 0             | 3     | 0.4643   | 1.00      | 0.4643            | 2             | 12    |
| Afghanistan                              | Warsaj, AFG                        | AFG5     | 0.0051 | 0.08 | 0.0004    | 0             | 1     | 0.8114   | 1.00      | 0.8114            | 4             | 12    |

| Region and<br>Country | Location                     | Code  | Pgt    |           |               |       |       | Barberry |           |                   |             |        |
|-----------------------|------------------------------|-------|--------|-----------|---------------|-------|-------|----------|-----------|-------------------|-------------|--------|
|                       |                              |       | MINF   | Fav-month | Favourable    | Risk  | Month | NHTT     | Fav-month | Favourable growth | Suitability | Months |
|                       |                              |       | (B)    | (F)       | index (B x F) | score |       | (D)      | (F)       | index (D x F)     | score       |        |
| Afghanistan           | Alingar 1, AFG               | AFG6  | 0.0040 | 0.17      | 0.0007        | 0     | 2     | 0.4667   | 0.92      | 0.4278            | 2           | 11     |
| Afghanistan           | Pur Chaman, AFG              | AFG7  | 0.0009 | 0.08      | 0.0001        | 0     | 1     | 0.4720   | 0.92      | 0.4327            | 2           | 11     |
| Afghanistan           | Alingar 2, AFG               | AFG8  | 0.0010 | 0.08      | 0.0001        | 0     | 1     | 0.5249   | 1.00      | 0.5249            | 3           | 12     |
| Afghanistan           | Sabari, AFG                  | AFG9  | 0      | 0.00      | 0.0000        | 0     | 0     | 0.4878   | 1.00      | 0.4878            | 2           | 12     |
| Afghanistan           | Bargi Matal, AFG             | AFG10 | 0      | 0.00      | 0.0000        | 0     | 0     | 0.5669   | 0.92      | 0.5197            | 3           | 11     |
| Afghanistan           | Panjwai, AFG                 | AFG11 | 0.0025 | 0.08      | 0.0002        | 0     | 1     | 0.3004   | 0.75      | 0.2253            | 1           | 9      |
| Afghanistan           | Taywara, AFG                 | AFG12 | 0.0004 | 0.08      | 0.0000        | 0     | 1     | 0.5588   | 1.00      | 0.5588            | 3           | 12     |
| Afghanistan           | Sayyad, AFG                  | AFG13 | 0.0032 | 0.25      | 0.0008        | 0     | 3     | 0.4240   | 0.92      | 0.3887            | 2           | 11     |
| Afghanistan           | Bangi, AFG                   | AFG14 | 0.0265 | 0.42      | 0.0111        | 1     | 5     | 0.4844   | 1.00      | 0.4844            | 2           | 12     |
| Afghanistan           | Zinda Jan, AFG               | AFG15 | 0.0005 | 0.08      | 0.0000        | 0     | 1     | 0.4134   | 0.92      | 0.3789            | 2           | 11     |
| Afghanistan           | Khamyab, AFG                 | AFG16 | 0.0145 | 0.17      | 0.0025        | 0     | 2     | 0.3646   | 0.75      | 0.2735            | 1           | 9      |
| Afghanistan           | Baghran, AFG                 | AFG17 | 0      | 0.00      | 0.0000        | 0     | 0     | 0.5241   | 1.00      | 0.5241            | 3           | 12     |
| Afghanistan           | Chihil Baghtoe Pashi, AFG    | AFG18 | 0      | 0.00      | 0.0000        | 0     | 0     | 0.5679   | 1.00      | 0.5679            | 3           | 12     |
| Afghanistan           | Saghar, AFG                  | AFG19 | 0      | 0.00      | 0.0000        | 0     | 0     | 0.5670   | 1.00      | 0.5670            | 3           | 12     |
| Afghanistan           | Khidir, AFG                  | AFG20 | 0      | 0.00      | 0.0000        | 0     | 0     | 0.5674   | 1.00      | 0.5674            | 3           | 12     |
| Azerbaijan            | Alekseyevka, Khasmaz, AZ     | AZ1   | 0.6765 | 0.75      | 0.5074        | 3     | 9     | 0.6180   | 0.83      | 0.5150            | 3           | 10     |
| Azerbaijan            | Derk, Quba, AZ               | AZ2   | 0.0373 | 0.33      | 0.0123        | 1     | 4     | 0.5559   | 1.00      | 0.5559            | 3           | 12     |
| Azerbaijan            | Qaradagh, Baku, AZ           | AZ3   | 0.1554 | 0.67      | 0.1041        | 2     | 8     | 0.5447   | 0.75      | 0.4085            | 2           | 9      |
| Azerbaijan            | Burkandul, Lerik, AZ         | AZ4   | 0.2766 | 0.83      | 0.2295        | 2     | 10    | 0.5183   | 0.83      | 0.4319            | 2           | 10     |
| Azerbaijan            | Hasanabad, Neftchala, AZ     | AZ5   | 0.9998 | 0.83      | 0.8298        | 4     | 10    | 0.4538   | 0.67      | 0.3026            | 2           | 8      |
| Azerbaijan            | Kurdchu, Hajiqabul, AZ       | AZ6   | 0.4129 | 0.83      | 0.3427        | 3     | 10    | 0.2879   | 0.75      | 0.2159            | 1           | 9      |
| Azerbaijan            | Malikumudlu, Ujar, AZ        | AZ7   | 0.0344 | 0.33      | 0.0113        | 1     | 4     | 0.4628   | 0.75      | 0.3471            | 2           | 9      |
| Azerbaijan            | Nagorno-Karabakh, AZ         | AZ8   | 0.0462 | 0.42      | 0.0194        | 1     | 5     | 0.5246   | 0.92      | 0.4809            | 2           | 11     |
| Azerbaijan            | Alxanlı, Fizuli, AZ          | AZ9   | 0.0444 | 0.33      | 0.0147        | 1     | 4     | 0.4776   | 0.83      | 0.3979            | 2           | 10     |
| Azerbaijan            | Sarica, Shaki, AZ            | AZ10  | 0.0477 | 0.33      | 0.0157        | 1     | 4     | 0.5075   | 0.83      | 0.4229            | 2           | 10     |
| Azerbaijan            | Qinli, Agstafa, AZ           | AZ11  | 0.0774 | 0.42      | 0.0325        | 1     | 5     | 0.5170   | 0.83      | 0.4308            | 2           | 10     |
| Azerbaijan            | Damchili, Goygol, AZ         | AZ12  | 0.0518 | 0.50      | 0.0259        | 1     | 6     | 0.5357   | 1.00      | 0.5357            | 3           | 12     |
| Azerbaijan            | Istisu, Nagorno-Karabakh, AZ | AZ13  | 0.0173 | 0.42      | 0.0073        | 0     | 5     | 0.5323   | 1.00      | 0.5323            | 3           | 12     |
| Azerbaijan            | Dizavar, Khizi, AZ           | AZ14  | 0.1790 | 0.75      | 0.1343        | 2     | 9     | 0.5712   | 0.83      | 0.4760            | 2           | 10     |

| Region and Country |                                 | Location | Code   | Pgt  |           |               |       | Barberry |           |                   |               |       |
|--------------------|---------------------------------|----------|--------|------|-----------|---------------|-------|----------|-----------|-------------------|---------------|-------|
|                    |                                 |          |        | MINF | Fav-month | Favourable    | Risk  | NHTT     | Fav-month | Favourable growth | Suitability   |       |
|                    |                                 |          |        | (B)  | (F)       | index (B x F) | score | Month    | (D)       | (F)               | index (D x F) | score |
| Azerbaijan         | Khinaliq, Qusar, AZ             | AZ15     | 0.0373 | 0.33 | 0.0123    | 1             | 4     | 0.5559   | 1.00      | 0.5559            | 3             | 12    |
| Azerbaijan         | Solguja, Oghuz, AZ              | AZ16     | 0.0266 | 0.33 | 0.0088    | 1             | 4     | 0.5508   | 1.00      | 0.5508            | 3             | 12    |
| Iran               | Ahar, East Azerbaijan, IRN      | IRN1     | 0.0151 | 0.33 | 0.0050    | 0             | 4     | 0.5355   | 1.00      | 0.5355            | 3             | 12    |
| Iran               | Tang-e-Panj, Khuzestan, IRN     | IRN2     | 0.0402 | 0.33 | 0.0133    | 1             | 4     | 0.3282   | 0.67      | 0.2188            | 1             | 8     |
| Iran               | Aghowz Darban, Mazandaran, IRN  | IRN3     | 0.0338 | 0.42 | 0.0142    | 1             | 5     | 0.5329   | 1.00      | 0.5329            | 3             | 12    |
| Iran               | Hakan, Fars, IRN                | IRN4     | 0      | 0.00 | 0.0000    | 0             | 0     | 0.2779   | 0.67      | 0.1853            | 1             | 8     |
| Iran               | Far-Ashian, North Khorasan, IRN | IRN5     | 0.0040 | 0.08 | 0.0003    | 0             | 1     | 0.4581   | 0.92      | 0.4200            | 2             | 11    |
| Iran               | Ferdows, South Khorasan, IRN    | IRN6     | 0.0708 | 0.42 | 0.0297    | 1             | 5     | 0.3684   | 0.75      | 0.2763            | 1             | 9     |
| Iran               | Gale Koor, Lorestan, IRN        | IRN7     | 0      | 0.00 | 0.0000    | 0             | 0     | 0.0205   | 0.25      | 0.0051            | 0             | 3     |
| Iran               | Tabriz, East Azerbaijan, IRN    | IRN8     | 0.0163 | 0.25 | 0.0041    | 0             | 3     | 0.5223   | 1.00      | 0.5223            | 3             | 12    |
| Iran               | Basak, Gilan, IRN               | IRN9     | 0.1419 | 0.42 | 0.0596    | 1             | 5     | 0.5669   | 1.00      | 0.5669            | 3             | 12    |
| Iran               | Arab Lang, Kurdistan, IRN       | IRN10    | 0.0015 | 0.08 | 0.0001    | 0             | 1     | 0.5269   | 1.00      | 0.5269            | 3             | 12    |
| Iran               | West Azerbaijan, IRN            | IRN11    | 0.0145 | 0.25 | 0.0036    | 0             | 3     | 0.5338   | 1.00      | 0.5338            | 3             | 12    |
| Iran               | Bilesavar, Ardabil, IRN         | IRN12    | 0.0515 | 0.33 | 0.0170    | 1             | 4     | 0.4914   | 0.92      | 0.4505            | 2             | 11    |
| Iran               | Kharfegil, Gilan, IRN           | IRN13    | 0.1419 | 0.42 | 0.0596    | 1             | 5     | 0.5669   | 1.00      | 0.5669            | 3             | 12    |
| Iran               | Charoymaq, East Azerbaijan, IRN | IRN14    | 0.0034 | 0.08 | 0.0003    | 0             | 1     | 0.5349   | 1.00      | 0.5349            | 3             | 12    |
| Iran               | Kaferoud, Gilan, IRN            | IRN15    | 0.4819 | 0.83 | 0.4000    | 3             | 10    | 0.4461   | 0.83      | 0.3718            | 2             | 10    |
| Iran               | Gadel, Zanjan, IRN              | IRN16    | 0.0053 | 0.17 | 0.0009    | 0             | 2     | 0.5226   | 1.00      | 0.5226            | 3             | 12    |
| Iran               | Roudbar Alamout, Qazvin, IRN    | IRN17    | 0.0782 | 0.42 | 0.0329    | 1             | 5     | 0.5496   | 1.00      | 0.5496            | 3             | 12    |
| Iran               | Tamisan, Tehran, IRN            | IRN18    | 0.0089 | 0.25 | 0.0022    | 0             | 3     | 0.5115   | 1.00      | 0.5115            | 3             | 12    |
| Iran               | Qarehtappeh, Mazandaran, IRN    | IRN19    | 0.3946 | 0.75 | 0.2960    | 2             | 9     | 0.3327   | 0.67      | 0.2218            | 1             | 8     |
| Iran               | Narlidaq, Golestan, IRN         | IRN20    | 0.0859 | 0.33 | 0.0284    | 1             | 4     | 0.3547   | 0.67      | 0.2365            | 1             | 8     |
| Iran               | Shirvan, North Khorasan, IRN    | IRN21    | 0.0006 | 0.08 | 0.0000    | 0             | 1     | 0.4849   | 1.00      | 0.4849            | 2             | 12    |
| Iran               | Mozduran, Razavi Khorasan, IRN  | IRN22    | 0.0101 | 0.17 | 0.0017    | 0             | 2     | 0.3961   | 0.75      | 0.2970            | 1             | 9     |
| Iran               | Shahrud, Semnan, IRN            | IRN23    | 0      | 0.00 | 0.0000    | 0             | 0     | 0.4057   | 0.75      | 0.3043            | 2             | 9     |
| Iran               | Abadan, Khuzestan, IRN          | IRN24    | 0.0326 | 0.17 | 0.0055    | 0             | 2     | 0.0911   | 0.50      | 0.0456            | 0             | 6     |
| Iran               | Anjiru, Bushehr, IRN            | IRN25    | 0.1725 | 0.50 | 0.0863    | 1             | 6     | 0.0307   | 0.42      | 0.0128            | 0             | 5     |
| Iran               | Abdan, Bushehr, IRN             | IRN26    | 0.0914 | 0.50 | 0.0457    | 1             | 6     | 0.0119   | 0.33      | 0.0040            | 0             | 4     |
| Iran               | Garisheh, Hormozgan, IRN        | IRN27    | 0.0094 | 0.33 | 0.0031    | 0             | 4     | 0.0098   | 0.33      | 0.0033            | 0             | 4     |

| Region and<br>Country | Location                           | Code  | Pgt         |                  |                             |               |       | Barberry    |                  |                                    |                      |        |
|-----------------------|------------------------------------|-------|-------------|------------------|-----------------------------|---------------|-------|-------------|------------------|------------------------------------|----------------------|--------|
|                       |                                    |       | MINF<br>(B) | Fav-month<br>(F) | Favourable<br>index (B x F) | Risk<br>score | Month | NHTT<br>(D) | Fav-month<br>(F) | Favourable growth<br>index (D x F) | Suitability<br>score | Months |
| Iran                  | Tifakan, Hormozgan, IRN            | IRN28 | 0.0010      | 0.08             | 0.0001                      | 0             | 1     | 0.0879      | 0.50             | 0.0440                             | 0                    | 6      |
| Iran                  | Kasi, Sistan and Balochistan, IRN  | IRN29 | 0.0021      | 0.17             | 0.0004                      | 0             | 2     | 0.0144      | 0.33             | 0.0048                             | 0                    | 4      |
| Iran                  | Khash, Sistan and Balochistan, IRN | IRN30 | 0           | 0.00             | 0.0000                      | 0             | 0     | 0.2331      | 0.67             | 0.1554                             | 1                    | 8      |
| Iran                  | Zarand, Kerman, IRN                | IRN31 | 0           | 0.00             | 0.0000                      | 0             | 0     | 0.3813      | 0.92             | 0.3495                             | 2                    | 11     |
| Iran                  | Reza Abad, Fars, IRN               | IRN32 | 0           | 0.00             | 0.0000                      | 0             | 0     | 0.4779      | 1.00             | 0.4779                             | 2                    | 12     |
| Iran                  | Sirusabad, Yazd, IRN               | IRN33 | 0           | 0.00             | 0.0000                      | 0             | 0     | 0.3507      | 0.75             | 0.2630                             | 1                    | 9      |
| Iran                  | Kashan County, Isfahan, IRN        | IRN34 | 0.0010      | 0.08             | 0.0001                      | 0             | 1     | 0.4711      | 0.92             | 0.4319                             | 2                    | 11     |
| Iran                  | Jera, Hamadan, IRN                 | IRN35 | 0.0040      | 0.17             | 0.0007                      | 0             | 2     | 0.5184      | 1.00             | 0.5184                             | 3                    | 12     |
| Iran                  | Cheshme, Markazi, IRN              | IRN36 | 0.0010      | 0.08             | 0.0001                      | 0             | 1     | 0.4737      | 0.92             | 0.4342                             | 2                    | 11     |
| Iran                  | Mahdishahr, Semnan, IRN            | IRN37 | 0.0022      | 0.08             | 0.0002                      | 0             | 1     | 0.4870      | 1.00             | 0.4870                             | 2                    | 12     |
| Iran                  | Shahrud 2, Semnan, IRN             | IRN38 | 0           | 0.00             | 0.0000                      | 0             | 0     | 0.3724      | 0.75             | 0.2793                             | 1                    | 9      |
| Iran                  | Dehrud, Fars, IRN                  | IRN39 | 0.0021      | 0.08             | 0.0002                      | 0             | 1     | 0.2632      | 0.67             | 0.1755                             | 1                    | 8      |
| Iran                  | Urmia, West Azerbaijan, IRN        | IRN40 | 0.0245      | 0.25             | 0.0061                      | 0             | 3     | 0.5339      | 1.00             | 0.5339                             | 3                    | 12     |
| Iran                  | Chalus, Mazandaran, IRN            | IRN41 | 0.5133      | 0.83             | 0.4261                      | 3             | 10    | 0.5125      | 0.83             | 0.4271                             | 2                    | 10     |
| Iran                  | Pourva, Mazandaran, IRN            | IRN42 | 0.3946      | 0.75             | 0.2960                      | 2             | 9     | 0.3327      | 0.67             | 0.2218                             | 1                    | 8      |
| Iran                  | Lulak-E Lebur, Mazandaran, IRN     | IRN43 | 0.0478      | 0.42             | 0.0201                      | 1             | 5     | 0.4698      | 1.00             | 0.4698                             | 2                    | 12     |
| Iran                  | Pust Kola, Mazandaran, IRN         | IRN44 | 0.0708      | 0.42             | 0.0297                      | 1             | 5     | 0.4911      | 1.00             | 0.4911                             | 2                    | 12     |
| Iran                  | Manuchehrkela, Mazandaran, IRN     | IRN45 | 0.9091      | 0.83             | 0.7546                      | 4             | 10    | 0.4198      | 0.67             | 0.2799                             | 1                    | 8      |
| Iran                  | Shalma Shaft, Gilan, IRN           | IRN46 | 0.2351      | 0.75             | 0.1764                      | 2             | 9     | 0.4991      | 0.83             | 0.4159                             | 2                    | 10     |
| Iran                  | Askabon, Gilan, IRN                | IRN47 | 0.0574      | 0.33             | 0.0189                      | 1             | 4     | 0.5166      | 1.00             | 0.5166                             | 3                    | 12     |
| Iran                  | GolRoudbar, Gilan, IRN             | IRN48 | 0.4819      | 0.83             | 0.4000                      | 3             | 10    | 0.4461      | 0.83             | 0.3718                             | 2                    | 10     |
| Iran                  | Harandan, Gilan, IRN               | IRN49 | 0.1944      | 0.50             | 0.0972                      | 1             | 6     | 0.5645      | 1.00             | 0.5645                             | 3                    | 12     |
| Iran                  | Rudakanar, Masally, AZ             | IRN50 | 0.2766      | 0.83             | 0.2295                      | 2             | 10    | 0.5183      | 0.83             | 0.4319                             | 2                    | 10     |
| Iran                  | Shaft, Gilan, IRN                  | IRN51 | 0.2351      | 0.75             | 0.1764                      | 2             | 9     | 0.4991      | 0.83             | 0.4159                             | 2                    | 10     |
| Iran                  | Shiveh Berow, West Azerbaijan, IRN | IRN52 | 0.0236      | 0.17             | 0.0040                      | 0             | 2     | 0.5390      | 1.00             | 0.5390                             | 3                    | 12     |
| Iran                  | Akhond Mahalleh, Mazandaran, IRN   | IRN53 | 0.2286      | 0.75             | 0.1715                      | 2             | 9     | 0.5683      | 1.00             | 0.5683                             | 3                    | 12     |
| Iran                  | Chanasak, Qazvin, IRN              | IRN54 | 0.0128      | 0.25             | 0.0032                      | 0             | 3     | 0.5099      | 1.00             | 0.5099                             | 3                    | 12     |
| Iran                  | Kuchek Khortum, Golestan, IRN      | IRN55 | 0.0789      | 0.33             | 0.0260                      | 1             | 4     | 0.3606      | 0.67             | 0.2404                             | 1                    | 8      |
| Iran                  | Viva, Golestan, IRN                | IRN56 | 0.2123      | 0.75             | 0.1592                      | 2             | 9     | 0.3987      | 0.67             | 0.2658                             | 1                    | 8      |

| Region and Country | Location                         | Code  | Pgt      |               |                          |            |       | Barberry |               |                                 |                   |        |
|--------------------|----------------------------------|-------|----------|---------------|--------------------------|------------|-------|----------|---------------|---------------------------------|-------------------|--------|
|                    |                                  |       | MINF (B) | Fav-month (F) | Favourable index (B x F) | Risk score | Month | NHTT (D) | Fav-month (F) | Favourable growth index (D x F) | Suitability score | Months |
| Iran               | Paeen Ahmad, Mazandaran, IRN     | IRN57 | 0.6008   | 0.75          | 0.4506                   | 3          | 9     | 0.3073   | 0.67          | 0.2049                          | 1                 | 8      |
| Iran               | Zirab, Mazandaran, IRN           | IRN58 | 0        | 0.08          | 0.0000                   | 0          | 1     | 0.4911   | 1.00          | 0.4911                          | 2                 | 12     |
| Kazakhstan         | Aksu, Karakiya, KZ               | KZ1   | 0.0004   | 0.08          | 0.0000                   | 0          | 1     | 0.4804   | 0.83          | 0.4003                          | 2                 | 10     |
| Kazakhstan         | Karakum, Tupkaragan, KZ          | KZ2   | 0.1232   | 0.58          | 0.0715                   | 1          | 7     | 0.5753   | 0.75          | 0.4315                          | 2                 | 9      |
| Kazakhstan         | Unnamed 2, Karakiya, KZ          | KZ3   | 0.0058   | 0.17          | 0.0010                   | 0          | 2     | 0.3954   | 0.92          | 0.3625                          | 2                 | 11     |
| Kazakhstan         | Unnamed, Karakum, Tupkaragan, KZ | KZ4   | 0.1286   | 0.33          | 0.0425                   | 1          | 4     | 0.4266   | 0.75          | 0.3199                          | 2                 | 9      |
| Kazakhstan         | Unnamed, Isatay, KZ              | KZ5   | 0.0271   | 0.33          | 0.0089                   | 1          | 4     | 0.3439   | 0.92          | 0.3153                          | 2                 | 11     |
| Kazakhstan         | Kulandy, Aral, KZ                | KZ6   | 0.0728   | 0.33          | 0.0240                   | 1          | 4     | 0.3000   | 0.92          | 0.2750                          | 1                 | 11     |
| Kazakhstan         | Bis-Bulyuk, Makat, KZ            | KZ7   | 0.0357   | 0.25          | 0.0089                   | 1          | 3     | 0.3267   | 0.92          | 0.2995                          | 1                 | 11     |
| Kazakhstan         | Kimer-Sayek-Kul', Syrym, KZ      | KZ8   | 0.0621   | 0.25          | 0.0155                   | 1          | 3     | 0.3075   | 1.00          | 0.3075                          | 2                 | 12     |
| Kazakhstan         | Akhol, Ayteke Bi, KZ             | KZ9   | 0.0574   | 0.33          | 0.0190                   | 1          | 4     | 0.2831   | 0.83          | 0.2359                          | 1                 | 10     |
| Kazakhstan         | Aiyrtau, Airtau, KZ              | KZ10  | 0.1374   | 0.42          | 0.0577                   | 1          | 5     | 0.3336   | 0.75          | 0.2502                          | 1                 | 9      |
| Kazakhstan         | L'vovka, Kashyr, KZ              | KZ11  | 0.1239   | 0.33          | 0.0409                   | 1          | 4     | 0.3228   | 0.75          | 0.2421                          | 1                 | 9      |
| Kazakhstan         | Sartymbet, Ulan, KZ              | KZ12  | 0.0536   | 0.33          | 0.0177                   | 1          | 4     | 0.3285   | 0.83          | 0.2737                          | 1                 | 10     |
| Kazakhstan         | Unnamed, Bukhar-Zhyrau, KZ       | KZ13  | 0.0267   | 0.42          | 0.0112                   | 1          | 5     | 0.0012   | 0.00          | 0.0000                          | 0                 | 0      |
| Kazakhstan         | Unnamed, Nura, KZ                | KZ14  | 0.0598   | 0.33          | 0.0197                   | 1          | 4     | 0.3177   | 0.83          | 0.2647                          | 1                 | 10     |
| Kazakhstan         | Unnamed, South Kazakhstan, KZ    | KZ15  | 0.0211   | 0.25          | 0.0053                   | 0          | 3     | 0.3927   | 0.83          | 0.3273                          | 2                 | 10     |
| Kazakhstan         | Unnamed, Bayganin, KZ            | KZ16  | 0.0756   | 0.33          | 0.0250                   | 1          | 4     | 0.2891   | 0.83          | 0.2409                          | 1                 | 10     |
| Kazakhstan         | Goloschchekin, Atyrau, KZ        | KZ17  | 0.0472   | 0.42          | 0.0198                   | 1          | 5     | 0.3969   | 0.92          | 0.3639                          | 2                 | 11     |
| Kazakhstan         | Unnamed, Atyrau, KZ              | KZ18  | 0.0483   | 0.33          | 0.0159                   | 1          | 4     | 0.3216   | 0.92          | 0.2948                          | 1                 | 11     |
| Kyrgyzstan         | Issyk-Kul, KGN                   | KGN1  | 0.0258   | 0.17          | 0.0044                   | 0          | 2     | 0.3689   | 0.92          | 0.3382                          | 2                 | 11     |
| Kyrgyzstan         | Temir-Kanat, Tong, KGN           | KGN2  | 0.0643   | 0.42          | 0.0270                   | 1          | 5     | 0.5107   | 1.00          | 0.5107                          | 3                 | 12     |
| Kyrgyzstan         | Ak-Su 1, KGN                     | KGN3  | 0        | 0.00          | 0.0000                   | 0          | 0     | 0.5270   | 1.00          | 0.5270                          | 3                 | 12     |
| Kyrgyzstan         | Naryn, At-Bashi, KGN             | KGN4  | 0        | 0.00          | 0.0000                   | 0          | 0     | 0.5739   | 0.83          | 0.4782                          | 2                 | 10     |
| Kyrgyzstan         | Lyangar, Kadamzhai, KGN          | KGN5  | 0        | 0.00          | 0.0000                   | 0          | 0     | 0.5594   | 0.92          | 0.5128                          | 3                 | 11     |
| Kyrgyzstan         | Uzak, Aravan, KGN                | KGN6  | 0.0073   | 0.17          | 0.0012                   | 0          | 2     | 0.5953   | 1.00          | 0.5953                          | 3                 | 12     |
| Kyrgyzstan         | Terek, Ak-Talaa, KGN             | KGN7  | 0.0058   | 0.08          | 0.0005                   | 0          | 1     | 0.4737   | 1.00          | 0.4737                          | 2                 | 12     |
| Kyrgyzstan         | Karabashat 1, Aksy, KGN          | KGN8  | 0.0004   | 0.08          | 0.0000                   | 0          | 1     | 0.5394   | 1.00          | 0.5394                          | 3                 | 12     |
| Kyrgyzstan         | Ak-Su 2, KGN                     | KGN9  | 0        | 0.00          | 0.0000                   | 0          | 0     | 0.5537   | 1.00          | 0.5537                          | 3                 | 12     |

| Region and Country |                                         | Location | Code   | Pgt      |               |                          |            | Barberry |          |               |                                 |                   |
|--------------------|-----------------------------------------|----------|--------|----------|---------------|--------------------------|------------|----------|----------|---------------|---------------------------------|-------------------|
|                    |                                         |          |        | MINF (B) | Fav-month (F) | Favourable index (B x F) | Risk score | Month    | NHTT (D) | Fav-month (F) | Favourable growth index (D x F) | Suitability score |
| Kyrgyzstan         | Konduk, Kara-Kulja, KGN                 | KGN10    | 0.0036 | 0.08     | 0.0003        | 0                        | 1          | 0.4939   | 1.00     | 0.4939        | 2                               | 12                |
| Kyrgyzstan         | Karabashat 2, Aksy, KGN                 | KGN11    | 0.0004 | 0.08     | 0.0000        | 0                        | 1          | 0.5582   | 0.75     | 0.4186        | 2                               | 9                 |
| Kyrgyzstan         | Panfilov, KGN                           | KGN12    | 0.0048 | 0.08     | 0.0004        | 0                        | 1          | 0.5708   | 1.00     | 0.5708        | 3                               | 12                |
| Kyrgyzstan         | Chot-Nura, Naryn, KGN                   | KGN13    | 0.0048 | 0.08     | 0.0004        | 0                        | 1          | 0.0527   | 0.75     | 0.0395        | 0                               | 9                 |
| Kyrgyzstan         | Issyk-kul region, KGN                   | KGN14    | 0.0068 | 0.17     | 0.0012        | 0                        | 2          | 0.5451   | 0.92     | 0.4997        | 2                               | 11                |
| Russia             | Rebrikhinsky, Altai Krai, RS            | RS1      | 0.1130 | 0.33     | 0.0373        | 1                        | 4          | 0.3329   | 0.75     | 0.2497        | 1                               | 9                 |
| Russia             | Miguty, Krasnodor Krai, RS              | RS2      | 0.0653 | 0.42     | 0.0274        | 1                        | 5          | 0.5130   | 0.92     | 0.4702        | 2                               | 11                |
| Russia             | Indyuk, Krasnodor Krai, RS              | RS3      | 0.3754 | 0.75     | 0.2815        | 2                        | 9          | 0.5911   | 1.00     | 0.5911        | 3                               | 12                |
| Russia             | Rassvet, Volgograd Oblast, RS           | RS4      | 0.0542 | 0.33     | 0.0179        | 1                        | 4          | 0.4279   | 0.92     | 0.3922        | 2                               | 11                |
| Russia             | Tyurinsky, Volgograd Oblast, RS         | RS5      | 0.0545 | 0.33     | 0.0180        | 1                        | 4          | 0.3541   | 1.00     | 0.3541        | 2                               | 12                |
| Russia             | Sadovyy, Volgograd Oblast, RS           | RS6      | 0.0537 | 0.25     | 0.0134        | 1                        | 3          | 0.3546   | 1.00     | 0.3546        | 2                               | 12                |
| Russia             | Grabovskiy, Rostov Oblast, RS           | RS7      | 0.0517 | 0.50     | 0.0258        | 1                        | 6          | 0.4536   | 0.92     | 0.4158        | 2                               | 11                |
| Russia             | Nogaysky, Dagestan Republic, RS         | RS8      | 0.0388 | 0.33     | 0.0128        | 1                        | 4          | 0.5127   | 0.83     | 0.4272        | 2                               | 10                |
| Russia             | Verkh Karanay, Dagestan Reoublic, RS    | RS9      | 0.0564 | 0.33     | 0.0186        | 1                        | 4          | 0.5398   | 1.00     | 0.5398        | 3                               | 12                |
| Russia             | Novourupskiy, Krasnodar Krai, RS        | RS10     | 0.0965 | 0.33     | 0.0319        | 1                        | 4          | 0.5388   | 1.00     | 0.5388        | 3                               | 12                |
| Russia             | Indyuk, Krasnodor Krai, RS              | RS11     | 0.3754 | 0.75     | 0.2815        | 2                        | 9          | 0.5911   | 1.00     | 0.5911        | 3                               | 12                |
| Russia             | Kiziltashskiy Liman, Krasnodar Krai, RS | RS12     | 0.5798 | 0.75     | 0.4349        | 3                        | 9          | 0.6095   | 0.83     | 0.5079        | 3                               | 10                |
| Russia             | Oktyabr'skiy, Krasnodar Krai, RS        | RS13     | 0.2365 | 0.50     | 0.1183        | 2                        | 6          | 0.5733   | 0.83     | 0.4777        | 2                               | 10                |
| Russia             | Sadovyy, Volgograd Oblast, RS           | RS14     | 0.0377 | 0.25     | 0.0094        | 1                        | 3          | 0.4324   | 1.00     | 0.4324        | 2                               | 12                |
| Russia             | Grabovskiy, Rostov Oblast, RS           | RS15     | 0.2135 | 0.33     | 0.0704        | 1                        | 4          | 0.8407   | 1.00     | 0.8407        | 4                               | 12                |
| Russia             | Nogaysky, Dagestan Republic, RS         | RS16     | 0.0356 | 0.25     | 0.0089        | 1                        | 3          | 0.3345   | 0.58     | 0.1951        | 1                               | 7                 |
| Russia             | Verkh Karanay, Dagestan Reoublic, RS    | RS17     | 0.1157 | 0.33     | 0.0382        | 1                        | 4          | 0.3032   | 0.58     | 0.1769        | 1                               | 7                 |
| Russia             | Novourupskiy, Krasnodar Krai, RS        | RS18     | 0.0753 | 0.33     | 0.0249        | 1                        | 4          | 0.3301   | 0.75     | 0.2475        | 1                               | 9                 |
| Russia             | Goytkh, Krasnodar Krai, RS              | RS19     | 0.2240 | 0.50     | 0.1120        | 2                        | 6          | 0.3578   | 0.75     | 0.2683        | 1                               | 9                 |
| Russia             | Volodarsky, Astrakhan Oblast, RS        | RS20     | 0.0939 | 0.42     | 0.0394        | 1                        | 5          | 0.4406   | 0.83     | 0.3671        | 2                               | 10                |
| Russia             | Kalmykia, RS                            | RS21     | 0.0404 | 0.33     | 0.0133        | 1                        | 4          | 0.4202   | 0.92     | 0.3852        | 2                               | 11                |
| Russia             | Grushevo, Astrakhan Oblast, RS          | RS22     | 0.0470 | 0.42     | 0.0197        | 1                        | 5          | 0.4335   | 0.92     | 0.3974        | 2                               | 11                |
| Russia             | Khivsky, Dagestan, RS                   | RS23     | 0.1038 | 0.50     | 0.0519        | 1                        | 6          | 0.5752   | 1.00     | 0.5752        | 3                               | 12                |
| Tajikistan         | Ardzhanak, Hisor, TJ                    | TJ1      | 0.0068 | 0.17     | 0.0012        | 0                        | 2          | 0.4922   | 1.00     | 0.4922        | 2                               | 12                |

|              |                                    | Pgt   |        |           |               |       |       | Barberry |           |                   |             |        |
|--------------|------------------------------------|-------|--------|-----------|---------------|-------|-------|----------|-----------|-------------------|-------------|--------|
| Region and   |                                    |       | MINF   | Fav-month | Favourable    | Risk  |       | NHTT     | Fav-month | Favourable growth | Suitability |        |
| Country      | Location                           | Code  | (B)    | (F)       | index (B x F) | score | Month | (D)      | (F)       | index (D x F)     | score       | Months |
| Tajikistan   | Kaltashur, TJ                      | TJ2   | 0.0150 | 0.33      | 0.0049        | 0     | 4     | 0.3897   | 0.75      | 0.2923            | 1           | 9      |
| Tajikistan   | Arabkhana, Shahrtuz, TJ            | TJ3   | 0.0185 | 0.33      | 0.0061        | 0     | 4     | 0.3669   | 0.75      | 0.2752            | 1           | 9      |
| Tajikistan   | Unnamed, Gorno-Badakhshan, TJ      | TJ4   | 0      | 0.00      | 0.0000        | 0     | 0     | 0.4327   | 0.75      | 0.3246            | 2           | 9      |
| Tajikistan   | Khamirabot, Ghafurov, TJ           | TJ5   | 0.0475 | 0.33      | 0.0157        | 1     | 4     | 0.4625   | 0.92      | 0.4240            | 2           | 11     |
| Tajikistan   | Karakendzha, Jirgato, TJ           | TJ6   | 0      | 0.00      | 0.0000        | 0     | 0     | 0.5594   | 0.83      | 0.4661            | 2           | 10     |
| Tajikistan   | Shahrinav, Shakhriaw, TJ           | TJ7   | 0.0012 | 0.08      | 0.0001        | 0     | 1     | 0.4937   | 1.00      | 0.4937            | 2           | 12     |
| Tajikistan   | Medynved, Roshtqala, TJ            | TJ8   | 0      | 0.00      | 0.0000        | 0     | 0     | 0.5006   | 0.75      | 0.3754            | 2           | 9      |
| Tajikistan   | Vose, TJ                           | TJ9   | 0.0141 | 0.42      | 0.0059        | 0     | 5     | 0.4515   | 0.83      | 0.3762            | 2           | 10     |
| Tajikistan   | Shurpast, Varzov, TJ               | TJ10  | 0.0009 | 0.08      | 0.0001        | 0     | 1     | 0.5377   | 1.00      | 0.5377            | 3           | 12     |
| Tajikistan   | Qurgonteppa, Sarband, TJ           | TJ11  | 0.0218 | 0.33      | 0.0072        | 0     | 4     | 0.3703   | 0.75      | 0.2778            | 1           | 9      |
| Tajikistan   | Arzing, Tavildara, TJ              | TJ12  | 0      | 0.00      | 0.0000        | 0     | 0     | 0.5838   | 0.92      | 0.5352            | 3           | 11     |
| Tajikistan   | Barchidev, Rushon, TJ              | TJ13  | 0      | 0.00      | 0.0000        | 0     | 0     | 0.4111   | 0.67      | 0.2741            | 1           | 8      |
| Turkmenistan | Karagez, Balkan, TKM               | TKM1  | 0.0399 | 0.25      | 0.0100        | 1     | 3     | 0.4088   | 0.75      | 0.3066            | 2           | 9      |
| Turkmenistan | Syul'men, Balkan, TKM              | TKM2  | 0.0227 | 0.33      | 0.0075        | 0     | 4     | 0.4924   | 0.75      | 0.3693            | 2           | 9      |
| Turkmenistan | Aydin, Balkan, TKM                 | TKM3  | 0.0158 | 0.17      | 0.0027        | 0     | 2     | 0.4268   | 0.75      | 0.3201            | 2           | 9      |
| Turkmenistan | Ekerem, Balkan, TKM                | TKM4  | 0.4045 | 0.83      | 0.3358        | 3     | 10    | 0.4196   | 0.67      | 0.2798            | 1           | 8      |
| Turkmenistan | Bekibent, Balkan, TKM              | TKM5  | 0.0399 | 0.25      | 0.0100        | 1     | 3     | 0.4088   | 0.75      | 0.3066            | 2           | 9      |
| Turkmenistan | Kabyl, Balkan, TKM                 | TKM6  | 0.0227 | 0.33      | 0.0075        | 0     | 4     | 0.4924   | 0.75      | 0.3693            | 2           | 9      |
| Turkmenistan | Unnamed 1, Balkan, TKM             | TKM7  | 0      | 0.00      | 0.0000        | 0     | 0     | 0.4387   | 0.75      | 0.3290            | 2           | 9      |
| Turkmenistan | Unnamed 2, Balkan, TKM             | TKM8  | 0.0058 | 0.25      | 0.0015        | 0     | 3     | 0.4393   | 0.75      | 0.3295            | 2           | 9      |
| Turkmenistan | Kaplankyr Reserve1, Dashoguz, TKM  | TKM9  | 0.0054 | 0.17      | 0.0009        | 0     | 2     | 0.4109   | 0.75      | 0.3081            | 2           | 9      |
| Turkmenistan | Kaplankyr Reserve 2, Dashoguz, TKM | TKM10 | 0.0145 | 0.25      | 0.0036        | 0     | 3     | 0.3992   | 0.75      | 0.2994            | 1           | 9      |
| Turkmenistan | Shakhnamy, Dasoguz, TKM            | TKM11 | 0.0043 | 0.17      | 0.0007        | 0     | 2     | 0.3852   | 0.75      | 0.2889            | 1           | 9      |
| Turkmenistan | Unnamed 1, Mary, TKM               | TKM12 | 0.0014 | 0.08      | 0.0001        | 0     | 1     | 0.3872   | 0.75      | 0.2904            | 1           | 9      |
| Turkmenistan | Dervezekem, Mary, TKM              | TKM13 | 0.0044 | 0.17      | 0.0008        | 0     | 2     | 0.3835   | 0.75      | 0.2876            | 1           | 9      |
| Turkmenistan | Batash, Lebap, TKM                 | TKM14 | 0.0129 | 0.17      | 0.0022        | 0     | 2     | 0.3708   | 0.75      | 0.2781            | 1           | 9      |
| Turkmenistan | Unnamed 2, Mary, TKM               | TKM15 | 0.0140 | 0.25      | 0.0035        | 0     | 3     | 0.3984   | 0.75      | 0.2988            | 1           | 9      |
| Turkmenistan | Unnamed , Ahal, TKM                | TKM16 | 0.0140 | 0.25      | 0.0035        | 0     | 3     | 0.4111   | 0.75      | 0.3083            | 2           | 9      |
| Turkmenistan | Serbar, Balkan, TKM                | TKM17 | 0.0236 | 0.17      | 0.0040        | 0     | 2     | 0.4162   | 0.75      | 0.3121            | 2           | 9      |

| Region and Country | Location                 | Code  | Pgt      |               |                          |            |       | Barberry |               |                                 |                   |        |
|--------------------|--------------------------|-------|----------|---------------|--------------------------|------------|-------|----------|---------------|---------------------------------|-------------------|--------|
|                    |                          |       | MINF (B) | Fav-month (F) | Favourable index (B x F) | Risk score | Month | NHTT (D) | Fav-month (F) | Favourable growth index (D x F) | Suitability score | Months |
| Turkmenistan       | Unnamed 3, Balkan, TKM   | TKM18 | 0.0064   | 0.17          | 0.0011                   | 0          | 2     | 0.4295   | 0.75          | 0.3221                          | 2                 | 9      |
| Turkmenistan       | Unnamed, Dashoguz, TKM   | TKM19 | 0.0085   | 0.33          | 0.0028                   | 0          | 4     | 0.4079   | 0.75          | 0.3059                          | 2                 | 9      |
| Turkmenistan       | Unnamed 4, Balkan, TKM   | TKM20 | 0.0046   | 0.08          | 0.0004                   | 0          | 1     | 0.4223   | 0.75          | 0.3167                          | 2                 | 9      |
| Uzbekistan         | Shahrisabz, Yakkabog, UZ | UZ1   | 0.0211   | 0.17          | 0.0036                   | 0          | 2     | 0.4773   | 0.92          | 0.4375                          | 2                 | 11     |
| Uzbekistan         | Unnamed, Tamdy, UZ       | UZ2   | 0.0233   | 0.08          | 0.0019                   | 0          | 1     | 0.3867   | 0.92          | 0.3545                          | 2                 | 11     |
| Uzbekistan         | Unnamed 1, Muynak, UZ    | UZ3   | 0.1262   | 0.33          | 0.0416                   | 1          | 4     | 0.3529   | 0.75          | 0.2647                          | 1                 | 9      |
| Uzbekistan         | Unnamed 1, Kungrad, UZ   | UZ4   | 0.0398   | 0.17          | 0.0068                   | 0          | 2     | 0.3258   | 0.92          | 0.2986                          | 1                 | 11     |
| Uzbekistan         | Unnamed 2, Kungrad, UZ   | UZ5   | 0.0108   | 0.08          | 0.0009                   | 0          | 1     | 0.4040   | 0.75          | 0.3030                          | 2                 | 9      |
| Uzbekistan         | Vozrozhdeniya, UZ        | UZ6   | 0.4618   | 0.67          | 0.3094                   | 3          | 8     | 0.3267   | 0.75          | 0.2450                          | 1                 | 9      |
| Uzbekistan         | Unnamed 3, Kungrad, UZ   | UZ7   | 0.0251   | 0.08          | 0.0020                   | 0          | 1     | 0.3183   | 0.92          | 0.2918                          | 1                 | 11     |
| Uzbekistan         | Unnamed 4, Kungrad, UZ   | UZ8   | 0.1169   | 0.33          | 0.0386                   | 1          | 4     | 0.3137   | 0.75          | 0.2353                          | 1                 | 9      |
| Uzbekistan         | Unnamed 1, Karakiya, KZ  | UZ9   | 0.0059   | 0.00          | 0.0000                   | 0          | 0     | 0.4280   | 0.75          | 0.3210                          | 2                 | 9      |
| Uzbekistan         | Unnamed 2, Muynak, UZ    | UZ10  | 0.4476   | 0.67          | 0.2999                   | 2          | 8     | 0.3372   | 0.75          | 0.2529                          | 1                 | 9      |
| Uzbekistan         | Unnamed 3, Muynak, UZ    | UZ11  | 0.1056   | 0.33          | 0.0349                   | 1          | 4     | 0.3436   | 0.75          | 0.2577                          | 1                 | 9      |
| Uzbekistan         | Kungrad, UZ              | UZ12  | 0.0092   | 0.17          | 0.0016                   | 0          | 2     | 0.3562   | 0.92          | 0.3266                          | 2                 | 11     |
| Uzbekistan         | Ahangaran, UZ            | UZ13  | 0.0577   | 0.33          | 0.0190                   | 1          | 4     | 0.2601   | 0.00          | 0.3121                          | 2                 | 10     |

**Proportion of sites with infection index 0.728**

|                            |                              |       |        |      |        |   |   |        |      |        |   |    |
|----------------------------|------------------------------|-------|--------|------|--------|---|---|--------|------|--------|---|----|
| <b>Northwest Asia (59)</b> |                              |       |        |      |        |   |   |        |      | 0.00   |   |    |
| Armenia                    | Lernahovit, Gegharkunik, ARM | ARM1  | 0.0458 | 0.42 | 0.0192 | 1 | 5 | 0.5338 | 1.00 | 0.5338 | 3 | 12 |
| Armenia                    | Norekart, Gegharkunik, ARM   | ARM2  | 0.0402 | 0.42 | 0.0169 | 1 | 5 | 0.5526 | 1.00 | 0.5526 | 3 | 12 |
| Armenia                    | Gandzakar, Tavush, ARM       | ARM3  | 0.0525 | 0.42 | 0.0220 | 1 | 5 | 0.5531 | 1.00 | 0.5531 | 3 | 12 |
| Armenia                    | Krasar, Shirak, ARM          | ARM4  | 0.0426 | 0.33 | 0.0140 | 1 | 4 | 0.5393 | 1.00 | 0.5393 | 3 | 12 |
| Armenia                    | Armavir, Armavir, ARM        | ARM5  | 0.0165 | 0.25 | 0.0041 | 0 | 3 | 0.5164 | 1.00 | 0.5164 | 3 | 12 |
| Armenia                    | Semyonovka, Gegharkunik, ARM | ARM6  | 0.0460 | 0.42 | 0.0193 | 1 | 5 | 0.5491 | 1.00 | 0.5491 | 3 | 12 |
| Armenia                    | Daranak, Gegharkunik, ARM    | ARM7  | 0.0402 | 0.42 | 0.0169 | 1 | 5 | 0.5526 | 1.00 | 0.5526 | 3 | 12 |
| Armenia                    | Artsvanist, Gegharkunik, ARM | ARM8  | 0.0402 | 0.42 | 0.0169 | 1 | 5 | 0.5526 | 1.00 | 0.5526 | 3 | 12 |
| Armenia                    | Tsovazard, Gegharkunik, ARM  | ARM9  | 0.0458 | 0.42 | 0.0192 | 1 | 5 | 0.5338 | 1.00 | 0.5338 | 3 | 12 |
| Armenia                    | Dilijan, Bovakar Ridge, ARM  | ARM10 | 0.0460 | 0.42 | 0.0193 | 1 | 5 | 0.5491 | 1.00 | 0.5491 | 3 | 12 |

| Region and<br>Country | Location                                | Code  | Pgt    |           |               |       |       | Barberry |           |                   |             |        |
|-----------------------|-----------------------------------------|-------|--------|-----------|---------------|-------|-------|----------|-----------|-------------------|-------------|--------|
|                       |                                         |       | MINF   | Fav-month | Favourable    | Risk  | Month | NHTT     | Fav-month | Favourable growth | Suitability | Months |
|                       |                                         |       | (B)    | (F)       | index (B x F) | score |       | (D)      | (F)       | index (D x F)     | score       |        |
| Georgia               | Likhni, GRG                             | GRG1  | 0.3954 | 0.75      | 0.2966        | 2     | 9     | 0.1958   | 1.00      | 0.1958            | 1           | 12     |
| Georgia               | Lukhi, Samegrelo-Zemo Svaneti, GRG      | GRG2  | 0.1749 | 0.50      | 0.0874        | 1     | 6     | 0.2460   | 1.00      | 0.2460            | 1           | 12     |
| Georgia               | Ergeta, Samegrelo-Zemo Svaneti, GRG     | GRG3  | 0.8740 | 1.00      | 0.8740        | 4     | 12    | 0.0544   | 0.83      | 0.0454            | 0           | 10     |
| Georgia               | Zeda sameba, GRG                        | GRG4  | 0.6838 | 1.00      | 0.6838        | 3     | 12    | 0.1080   | 1.00      | 0.1080            | 1           | 12     |
| Georgia               | Kvaisi, South Ossetia, GRG              | GRG5  | 0.0513 | 0.42      | 0.0216        | 1     | 5     | 0.2964   | 1.00      | 0.2964            | 1           | 12     |
| Georgia               | Rustavi, Kvemo Kartli, GRG              | GRG6  | 0.0623 | 0.50      | 0.0312        | 1     | 6     | 0.1677   | 1.00      | 0.1677            | 1           | 12     |
| Georgia               | Telavi, Kakheti, GRG                    | GRG7  | 0.0577 | 0.42      | 0.0242        | 1     | 5     | 0.1885   | 1.00      | 0.1885            | 1           | 12     |
| Georgia               | Lahili, Samegrelo-Zemo Svaneti, GRG     | GRG8  | 0.1269 | 0.50      | 0.0635        | 1     | 6     | 0.3244   | 1.00      | 0.3244            | 2           | 12     |
| Georgia               | Vabiskhevi, Borjomi nature Reserve, GRG | GRG9  | 0.0756 | 0.58      | 0.0438        | 1     | 7     | 0.2764   | 0.75      | 0.2073            | 1           | 9      |
| Turkey                | Ilyaslar, Bolu, TKY                     | TKY1  | 0.0353 | 0.33      | 0.0116        | 1     | 4     | 0.5885   | 1.00      | 0.5885            | 3           | 12     |
| Turkey                | Buyukcakirman, Erzincan, TKY            | TKY2  | 0.0271 | 0.33      | 0.0089        | 1     | 4     | 0.5672   | 1.00      | 0.5672            | 3           | 12     |
| Turkey                | Karakoy, Denizli, TKY                   | TKY3  | 0.0130 | 0.17      | 0.0022        | 0     | 2     | 0.5004   | 0.92      | 0.4587            | 2           | 11     |
| Turkey                | Gercam Mahallesi, Denizli, TKY          | TKY4  | 0.0382 | 0.25      | 0.0096        | 1     | 3     | 0.4779   | 0.83      | 0.3982            | 2           | 10     |
| Turkey                | Sagrak Koyu, Isparta, TKY               | TKY5  | 0.0127 | 0.17      | 0.0022        | 0     | 2     | 0.5905   | 1.00      | 0.5905            | 3           | 12     |
| Turkey                | Cesmelisebil, Konya, TKY                | TKY6  | 0.0058 | 0.17      | 0.0010        | 0     | 2     | 0.5453   | 1.00      | 0.5453            | 3           | 12     |
| Turkey                | Isikkaya Mahallesi, Adana, TKY          | TKY7  | 0.0172 | 0.25      | 0.0043        | 0     | 3     | 0.5501   | 1.00      | 0.5501            | 3           | 12     |
| Turkey                | Kaymakli, Erzican, TKY                  | TKY8  | 0.0157 | 0.17      | 0.0027        | 0     | 2     | 0.5336   | 1.00      | 0.5336            | 3           | 12     |
| Turkey                | kale Koyu, Rize, TKY                    | TKY9  | 0.1722 | 0.58      | 0.0999        | 1     | 7     | 0.5668   | 1.00      | 0.5668            | 3           | 12     |
| Turkey                | Merkez mahallesi, Sinop, TKY            | TKY10 | 0.2056 | 0.58      | 0.1192        | 2     | 7     | 0.5930   | 1.00      | 0.5930            | 3           | 12     |
| Turkey                | Sulek Koyu, Bartin, TKY                 | TKY11 | 0.1219 | 0.42      | 0.0512        | 1     | 5     | 0.5667   | 1.00      | 0.5667            | 3           | 12     |
| Turkey                | Sayalar Mahallesi, Istanbul, TKY        | TKY12 | 0.6046 | 0.83      | 0.5018        | 3     | 10    | 0.5132   | 0.83      | 0.4277            | 2           | 10     |
| Turkey                | Camliova Mahallesi, Antalya, TKY        | TKY13 | 0.8624 | 0.75      | 0.6468        | 3     | 9     | 0.1368   | 0.67      | 0.0912            | 0           | 8      |
| Turkey                | Agackoy Koyu, Canakkale, TKY            | TKY14 | 0.1798 | 0.58      | 0.1043        | 2     | 7     | 0.4533   | 0.83      | 0.3778            | 2           | 10     |
| Turkey                | Dogla Mahallesi, Bursa, TKY             | TKY15 | 0.3396 | 0.83      | 0.2819        | 2     | 10    | 0.4830   | 0.83      | 0.4025            | 2           | 10     |
| Turkey                | Kaleici Mahallesi, Istanbul, TKY        | TKY16 | 0.6046 | 0.83      | 0.5018        | 3     | 10    | 0.5132   | 0.83      | 0.4277            | 2           | 10     |
| Turkey                | Camkoy Koyu, Canakkale, TKY             | TKY17 | 0.2924 | 0.83      | 0.2427        | 2     | 10    | 0.4588   | 0.83      | 0.3824            | 2           | 10     |
| Turkey                | Musellim Koyu, Kirklareli, TKY          | TKY18 | 0.0726 | 0.33      | 0.0240        | 1     | 4     | 0.4923   | 0.83      | 0.4103            | 2           | 10     |
| Turkey                | Canakca Mahllesi, Istanbul, TKY         | TKY19 | 0.6046 | 0.83      | 0.5018        | 3     | 10    | 0.5132   | 0.83      | 0.4277            | 2           | 10     |
| Turkey                | Imamlar Mahallesi, Sakarya, TKY         | TKY20 | 0.9057 | 0.92      | 0.8332        | 4     | 11    | 0.5138   | 0.83      | 0.4282            | 2           | 10     |

| Region and Country |                                      | Location | Code  | Pgt      |               |                          |            | Barberry |          |               |                                 |                   |        |
|--------------------|--------------------------------------|----------|-------|----------|---------------|--------------------------|------------|----------|----------|---------------|---------------------------------|-------------------|--------|
|                    |                                      |          |       | MINF (B) | Fav-month (F) | Favourable index (B x F) | Risk score | Month    | NHTT (D) | Fav-month (F) | Favourable growth index (D x F) | Suitability score | Months |
| Turkey             | Haydarlar Mahallesi, Ankara, TKY     |          | TKY21 | 0.0155   | 0.25          | 0.0039                   | 0          | 3        | 0.5708   | 1.00          | 0.5708                          | 3                 | 12     |
| Turkey             | Ezelter Koyu, Giresun, TKY           |          | TKY22 | 0.1583   | 0.58          | 0.0918                   | 1          | 7        | 0.6227   | 1.00          | 0.6227                          | 3                 | 12     |
| Turkey             | Ortaklar Koyu, Rize, TKY             |          | TKY23 | 0.1722   | 0.58          | 0.0999                   | 1          | 7        | 0.5668   | 1.00          | 0.5668                          | 3                 | 12     |
| Turkey             | Esmepinar Koyu, Erzican, TKY         |          | TKY24 | 0.0029   | 0.17          | 0.0005                   | 0          | 2        | 0.5251   | 1.00          | 0.5251                          | 3                 | 12     |
| Turkey             | Yolgecen, Artvin, TKY                |          | TKY25 | 0.5354   | 0.83          | 0.4444                   | 3          | 10       | 0.6126   | 1.00          | 0.6126                          | 3                 | 12     |
| Turkey             | Kaplanli Kyo, Afyonkarahisar, TKY    |          | TKY26 | 0.0160   | 0.33          | 0.0053                   | 0          | 4        | 0.5853   | 1.00          | 0.5853                          | 3                 | 12     |
| Turkey             | Kokulupinar Koyu, Agri, TKY          |          | TKY27 | 0        | 0.00          | 0.0000                   | 0          | 0        | 0.5154   | 1.00          | 0.5154                          | 3                 | 12     |
| Turkey             | Sekirhan, Diyarbakir, TKY            |          | TKY28 | 0.0187   | 0.17          | 0.0032                   | 0          | 2        | 0.4979   | 1.00          | 0.4979                          | 2                 | 12     |
| Turkey             | Bulduk Mahallesi, Konya, TKY         |          | TKY29 | 0.0095   | 0.17          | 0.0016                   | 0          | 2        | 0.5516   | 1.00          | 0.5516                          | 3                 | 12     |
| Turkey             | Yeni Mahallesi, Denizli, TKY         |          | TKY30 | 0.0130   | 0.17          | 0.0022                   | 0          | 2        | 0.5004   | 0.92          | 0.4587                          | 2                 | 11     |
| Turkey             | Ceceli Mahallesi, Kahramanmaras, TKY |          | TKY31 | 0.0166   | 0.25          | 0.0042                   | 0          | 3        | 0.5009   | 0.83          | 0.4174                          | 2                 | 10     |
| Turkey             | Yagmurlar Koyu, Kutaha, TKY          |          | TKY32 | 0.0108   | 0.25          | 0.0027                   | 0          | 3        | 0.5873   | 1.00          | 0.5873                          | 3                 | 12     |
| Turkey             | Eskigomu Koyu, Afyonkarahisar, TKY   |          | TKY33 | 0.0107   | 0.33          | 0.0035                   | 0          | 4        | 0.5717   | 1.00          | 0.5717                          | 3                 | 12     |
| Turkey             | Adakoy Koyu, Zonguldak, TKY          |          | TKY34 | 0.1219   | 0.42          | 0.0512                   | 1          | 5        | 0.5667   | 1.00          | 0.5667                          | 3                 | 12     |
| Turkey             | Yonkali Koyu, Corum, TKY             |          | TKY35 | 0.0231   | 0.25          | 0.0058                   | 0          | 3        | 0.5533   | 1.00          | 0.5533                          | 3                 | 12     |
| Turkey             | Gundogan Mahallesi, Ankara, TKY      |          | TKY36 | 0.0140   | 0.17          | 0.0024                   | 0          | 2        | 0.5489   | 1.00          | 0.5489                          | 3                 | 12     |
| Turkey             | Dereli Koyu, Bartin, TKY             |          | TKY37 | 0.4384   | 0.75          | 0.3288                   | 3          | 9        | 0.5895   | 1.00          | 0.5895                          | 3                 | 12     |
| Turkey             | Ahlatcik Koyu, Corum, TKY            |          | TKY38 | 0.0231   | 0.25          | 0.0058                   | 0          | 3        | 0.5533   | 1.00          | 0.5533                          | 3                 | 12     |
| Turkey             | Yaylakent Koyu, Tokat, TKY           |          | TKY39 | 0.0272   | 0.17          | 0.0046                   | 0          | 2        | 0.5598   | 1.00          | 0.5598                          | 3                 | 12     |
| Turkey             | Akoren, Mengen, TKY                  |          | TKY40 | 0.2740   | 0.83          | 0.2274                   | 2          | 10       | 0.5132   | 0.83          | 0.4277                          | 2                 | 10     |

**Proportion of sites with infection index 0.983**

**Southwest Asia (50)**

| Southwest Asia (50) |                                |      |        |      |        |   |   |        |      | 0.00   |   |   |  |
|---------------------|--------------------------------|------|--------|------|--------|---|---|--------|------|--------|---|---|--|
| Egypt               | Unnamed, Hala'ib Triangle, EGY | EGY1 | 0      | 0.00 | 0.0000 | 0 | 0 | 0.0056 | 0.33 | 0.0019 | 0 | 4 |  |
| Egypt               | Unnamed, Qesm Marsa Alam, EGY  | EGY2 | 0      | 0.00 | 0.0000 | 0 | 0 | 0.0297 | 0.50 | 0.0148 | 0 | 6 |  |
| Egypt               | Qism ras Ghareb, Red Sea, EGY  | EGY3 | 0      | 0.00 | 0.0000 | 0 | 0 | 0.0763 | 0.50 | 0.0381 | 0 | 6 |  |
| Egypt               | Qesm Nwebaa, South Sinai, EGY  | EGY4 | 0.0007 | 0.08 | 0.0001 | 0 | 1 | 0.2034 | 0.75 | 0.1526 | 1 | 9 |  |
| Egypt               | Arish, North Sinai, EGY        | EGY5 | 0.0050 | 0.25 | 0.0013 | 0 | 3 | 0.1311 | 0.67 | 0.0874 | 0 | 8 |  |
| Egypt               | Kom-El-Farag, El Beheira, EGY  | EGY6 | 0.0019 | 0.08 | 0.0002 | 0 | 1 | 0.0913 | 0.58 | 0.0533 | 0 | 7 |  |

| Region and<br>Country | Location                                    | Code   | Pgt    |           |               |       |       | Barberry |           |                   |             |        |
|-----------------------|---------------------------------------------|--------|--------|-----------|---------------|-------|-------|----------|-----------|-------------------|-------------|--------|
|                       |                                             |        | MINF   | Fav-month | Favourable    | Risk  | Month | NHTT     | Fav-month | Favourable growth | Suitability | Months |
|                       |                                             |        | (B)    | (F)       | index (B x F) | score |       | (D)      | (F)       | index (D x F)     | score       |        |
| Egypt                 | Qism Moury Matrouh, Matrough, EGY           | EGY7   | 0.0100 | 0.17      | 0.0017        | 0     | 2     | 0.1202   | 0.67      | 0.0801            | 0           | 8      |
| Egypt                 | Qesm Sidi Brani, Matrough, EGY              | EGY8   | 0.3653 | 0.58      | 0.2119        | 2     | 7     | 0.0409   | 0.58      | 0.0238            | 0           | 7      |
| Egypt                 | Qesm Sidi Brani 1, Matrough, EGY            | EGY9   | 0.0004 | 0.08      | 0.0000        | 0     | 1     | 0.1276   | 0.67      | 0.0851            | 0           | 8      |
| Egypt                 | Qesm Al Wahat Al Khargah 1, New Valley, EGY | EEGY10 | 0      | 0.00      | 0.0000        | 0     | 0     | 0.1512   | 0.67      | 0.1008            | 1           | 8      |
| Egypt                 | Qesm Al Wahat Al Khargah 2, New Valley, EGY | EEGY11 | 0      | 0.00      | 0.0000        | 0     | 0     | 0.0690   | 0.50      | 0.0345            | 0           | 6      |
| Egypt                 | Abu ar Rish Basri, Red Sea, EGY             | EGY12  | 0      | 0.00      | 0.0000        | 0     | 0     | 0.0885   | 0.50      | 0.0442            | 0           | 6      |
| Egypt                 | Qesm Al Wahat Ad Dakhlah 1, New Valley, EGY | EEGY13 | 0      | 0.00      | 0.0000        | 0     | 0     | 0.1089   | 0.58      | 0.0635            | 0           | 7      |
| Egypt                 | Qesm Hurghada 1, Red Sea, EGY               | EGY14  | 0      | 0.00      | 0.0000        | 0     | 0     | 0.1072   | 0.58      | 0.0625            | 0           | 7      |
| Egypt                 | Qesm Sham Ash Sheikh, South Sinai, EGY      | EGY15  | 0.0009 | 0.08      | 0.0001        | 0     | 1     | 0.0477   | 0.50      | 0.0238            | 0           | 6      |
| Egypt                 | Ataqah 1, Suez, EGY                         | EGY16  | 0.0029 | 0.08      | 0.0002        | 0     | 1     | 0.1285   | 0.67      | 0.0857            | 0           | 8      |
| Egypt                 | Qesm Hurghada 2, Red Sea, EGY               | EGY17  | 0      | 0.00      | 0.0000        | 0     | 0     | 0.1063   | 0.58      | 0.0620            | 0           | 7      |
| Egypt                 | Unanmed, Red Sea, EGY                       | EGY18  | 0      | 0.00      | 0.0000        | 0     | 0     | 0.1510   | 0.67      | 0.1007            | 1           | 8      |
| Egypt                 | Ataqah 2, Suez, EGY                         | EGY19  | 0.0029 | 0.08      | 0.0002        | 0     | 1     | 0.1285   | 0.67      | 0.0857            | 0           | 8      |
| Egypt                 | Shata, Damietta, EGY                        | EGY20  | 0.0203 | 0.08      | 0.0016        | 0     | 1     | 0.0481   | 0.58      | 0.0281            | 0           | 7      |
| Iraq                  | Aghajah Mashad, Tooz, IQ                    | IRQ1   | 0.0275 | 0.33      | 0.0091        | 1     | 4     | 0.3229   | 0.67      | 0.2153            | 1           | 8      |
| Iraq                  | Unnamed, Ana, IQ                            | IRQ2   | 0.0016 | 0.08      | 0.0001        | 0     | 1     | 0.2877   | 0.67      | 0.1918            | 1           | 8      |
| Iraq                  | Unnamed, RTE France, KT                     | IRQ3   | 0      | 0.00      | 0.0000        | 0     | 0     |          | 0.50      | 0.0000            | 0           | 6      |
| Iraq                  | Unnamed, Najaf, IQ                          | IRQ4   | 0      | 0.08      | 0.0000        | 0     | 1     | 0.2015   | 0.58      | 0.1175            | 1           | 7      |
| Iraq                  | Unnamed, Ramadi, IQ                         | IRQ5   | 0.0055 | 0.08      | 0.0004        | 0     | 1     | 0.2279   | 0.58      | 0.1329            | 1           | 7      |
| Israel                | Givat Nili, Har Alexander, IS               | IS1    | 0.1143 | 0.50      | 0.0571        | 1     | 6     | 0.1223   | 0.58      | 0.0713            | 0           | 7      |
| Israel                | Ohad, Eshkol, IS                            | IS2    | 0.0358 | 0.42      | 0.0151        | 1     | 5     | 0.0801   | 0.58      | 0.0467            | 0           | 7      |
| Lebanon               | Mazraat Matariyet Jbaa, Maghdouche', LB     | Lb1    | 0.9615 | 0.75      | 0.7211        | 4     | 9     | 0.0723   | 0.58      | 0.0422            | 0           | 7      |
| Oman                  | Fajri, Al Batinah, OM                       | OM1    | 0      | 0.00      | 0.0000        | 0     | 0     | 0.0216   | 0.42      | 0.0090            | 0           | 5      |
| Oman                  | Unnamed, Ash Sharqiyah, South, OM           | OM2    | 0      | 0.00      | 0.0000        | 0     | 0     | 0.0006   | 0.00      | 0.0000            | 0           | 0      |
| Oman                  | Unnamed, Dhofar, OM                         | OM3    | 0      | 0.00      | 0.0000        | 0     | 0     | 0.0072   | 0.33      | 0.0024            | 0           | 4      |
| Oman                  | Hai;at La'mia, Al Wusta, OM                 | OM4    | 0      | 0.00      | 0.0000        | 0     | 0     | 0.0156   | 0.33      | 0.0052            | 0           | 4      |
| Saudi Arab            | Tawala, Tabuk, SA                           | SA1    | 0      | 0.00      | 0.0000        | 0     | 0     | 0.0083   | 0.33      | 0.0028            | 0           | 4      |
| Saudi Arab            | Unnamed 1, Tabuk, SA                        | SA2    | 0.0009 | 0.08      | 0.0001        | 0     | 1     | 0.0719   | 0.50      | 0.0359            | 0           | 6      |
| Saudi Arab            | Unnamed 2, Tabuk, SA                        | SA3    | 0      | 0.00      | 0.0000        | 0     | 0     | 0.0184   | 0.42      | 0.0077            | 0           | 5      |

| Region and Country |                                |      | Pgt    |               |            |       |      |           | Barberry          |             |        |    |  |
|--------------------|--------------------------------|------|--------|---------------|------------|-------|------|-----------|-------------------|-------------|--------|----|--|
|                    |                                |      | MINF   | Fav-month     | Favourable | Risk  |      |           |                   |             |        |    |  |
|                    |                                |      |        |               |            |       | NHTT | Fav-month | Favourable growth | Suitability |        |    |  |
| Location           | Code                           | (B)  | (F)    | index (B x F) | score      | Month | (D)  | (F)       | index (D x F)     | score       | Months |    |  |
| Saudi Arab         | Unnamed, Al Qunfudhah, SA      | SA4  | 0      | 0.00          | 0.0000     | 0     | 0    | 0.0017    | 0.17              | 0.0003      | 0      | 2  |  |
| Saudi Arab         | Shuwaq, Tabuk, SA              | SA5  | 0      | 0.00          | 0.0000     | 0     | 0    | 0.0450    | 0.50              | 0.0225      | 0      | 6  |  |
| Saudi Arab         | Unanmmed, Forest area, SA      | SA6  | 0      | 0.00          | 0.0000     | 0     | 0    | 0.2875    | 0.67              | 0.1917      | 1      | 8  |  |
| Saudi Arab         | Unnamed, Northern Borders, SA  | SA7  | 0      | 0.00          | 0.0000     | 0     | 0    | 0.2323    | 0.58              | 0.1355      | 1      | 7  |  |
| Saudi Arab         | Unanmed, Al Nufud Al Kabir, SA | SA8  | 0      | 0.00          | 0.0000     | 0     | 0    | 0.1347    | 0.50              | 0.0674      | 0      | 6  |  |
| Saudi Arab         | Unnamed, Al Aflaj, SA          | SA9  | 0      | 0.00          | 0.0000     | 0     | 0    | 0.0509    | 0.42              | 0.0212      | 0      | 5  |  |
| Saudi Arab         | Al Shinayin, Abu Dhabi, UAE    | SA10 | 0      | 0.00          | 0.0000     | 0     | 0    | 0.0127    | 0.33              | 0.0042      | 0      | 4  |  |
| Saudi Arab         | Unnamed, Al Ahsa, SA           | SA11 | 0.0146 | 0.25          | 0.0037     | 0     | 3    | 0.0388    | 0.42              | 0.0161      | 0      | 5  |  |
| Syria              | Babdh, Jableh, SY              | SY1  | 0.0780 | 0.42          | 0.0327     | 1     | 5    | 0.2822    | 0.75              | 0.2117      | 1      | 9  |  |
| Syria              | Khirbet Ghazaleh, Daraa, SY    | SY2  | 0.0409 | 0.25          | 0.0102     | 1     | 3    | 0.3193    | 0.83              | 0.2661      | 1      | 10 |  |
| Syria              | Palmyra, SY                    | SY3  | 0.0409 | 0.25          | 0.0102     | 1     | 3    | 0.3804    | 0.83              | 0.3170      | 2      | 10 |  |
| Yemen              | Karad, Ad Dali, YM             | YM1  | 0      | 0.00          | 0.0000     | 0     | 0    | 0.0284    | 0.58              | 0.0165      | 0      | 7  |  |
| Yemen              | Samarma, Al Mahrah, YM         | YM2  | 0      | 0.00          | 0.0000     | 0     | 0    | 0.0033    | 0.25              | 0.0008      | 0      | 3  |  |
| Yemen              | Unnamed, Hadhramaut, YM        | YM3  | 0.0004 | 0.08          | 0.0000     | 0     | 1    | 0.0371    | 0.42              | 0.0154      | 0      | 5  |  |
| Yemen              | Al Harajah, Hajjah, YM         | YM4  | 0      | 0.00          | 0.0000     | 0     | 0    | 0.0016    | 0.00              | 0.0049      | 0      | 4  |  |

**Proportion of sites with infection index 0.24**

|                                          |  |                                |      |        |      |        |   |    |        |      |        |   |    |
|------------------------------------------|--|--------------------------------|------|--------|------|--------|---|----|--------|------|--------|---|----|
| <b>Adjoining European countries (53)</b> |  |                                |      |        |      |        |   |    | 0.00   |      |        |   |    |
| Albania                                  |  | Sheshi, Tepelene, ALB          | ALB1 | 0.7956 | 0.92 | 0.7320 | 4 | 11 | 0.3760 | 0.83 | 0.3133 | 2 | 10 |
| Bulgaria                                 |  | Zhitosvyat, Karnobat, BL       | BL1  | 0.0294 | 0.25 | 0.0073 | 0 | 3  | 0.5125 | 1.00 | 0.5125 | 3 | 12 |
| Bulgaria                                 |  | Krupen, Kavarna, BL            | BL2  | 0.1199 | 0.50 | 0.0599 | 1 | 6  | 0.5571 | 0.83 | 0.4643 | 2 | 10 |
| Bulgaria                                 |  | Prismenovo, Primorsko, BL      | BL3  | 0.3110 | 0.83 | 0.2582 | 2 | 10 | 0.5536 | 0.83 | 0.4613 | 2 | 10 |
| Bulgaria                                 |  | Kartipanya, Dryanovo, BL       | BL4  | 0.0748 | 0.42 | 0.0314 | 1 | 5  | 0.5355 | 1.00 | 0.5355 | 3 | 12 |
| Bulgaria                                 |  | Manastirishte, Hayredin, BL    | BL5  | 0.1020 | 0.42 | 0.0428 | 1 | 5  | 0.4976 | 1.00 | 0.4976 | 2 | 12 |
| Bulgaria                                 |  | Pomen, Dve mongili, BL         | BL6  | 0.0741 | 0.42 | 0.0311 | 1 | 5  | 0.5129 | 1.00 | 0.5129 | 3 | 12 |
| Bulgaria                                 |  | Byalkovtsi, Elena, BL          | BL7  | 0.0418 | 0.25 | 0.0105 | 1 | 3  | 0.5278 | 1.00 | 0.5278 | 3 | 12 |
| Bulgaria                                 |  | Trakia, Opan, BL               | BL8  | 0.0506 | 0.25 | 0.0127 | 1 | 3  | 0.5191 | 1.00 | 0.5191 | 3 | 12 |
| Bulgaria                                 |  | Byal Kladenets, Stambolovo, BL | BL9  | 0.0396 | 0.25 | 0.0099 | 1 | 3  | 0.5099 | 1.00 | 0.5099 | 3 | 12 |
| Bulgaria                                 |  | Lyahovo, Balchik, BL           | BL10 | 0.5250 | 0.83 | 0.4357 | 3 | 10 | 0.5896 | 0.83 | 0.4913 | 2 | 10 |

| Region and Country |                                           | Location | Code   | Pgt  |           |               |       | Barberry |           |                   |               |       |
|--------------------|-------------------------------------------|----------|--------|------|-----------|---------------|-------|----------|-----------|-------------------|---------------|-------|
|                    |                                           |          |        | MINF | Fav-month | Favourable    | Risk  | NHTT     | Fav-month | Favourable growth | Suitability   |       |
|                    |                                           |          |        | (B)  | (F)       | index (B x F) | score | Month    | (D)       | (F)               | index (D x F) | score |
| Croatia            | Ridane, CR                                | CR1      | 0.4811 | 1.00 | 0.4811    | 3             | 12    | 0.5578   | 1.00      | 0.5578            | 3             | 12    |
| Croatia            | Baska, Opcina, CR                         | CR2      | 0.8308 | 1.00 | 0.8308    | 4             | 12    | 0.8407   | 1.00      | 0.8407            | 4             | 12    |
| Greece             | Doumpia, Anthemountas, GR                 | GR1      | 0.1527 | 0.83 | 0.1268    | 2             | 10    | 0.5022   | 0.83      | 0.4185            | 2             | 10    |
| Greece             | Kokkinaras, Koropi, GR                    | GR2      | 0.8089 | 0.83 | 0.6714    | 3             | 10    | 0.1736   | 0.67      | 0.1158            | 1             | 8     |
| Greece             | Gergeri, Rouvas, GR                       | GR3      | 1.0000 | 0.83 | 0.8300    | 4             | 10    | 0.1047   | 0.67      | 0.0698            | 0             | 8     |
| Greece             | Dafniotissa, Amaliada, GR                 | GR4      | 0.9090 | 0.83 | 0.7545    | 4             | 10    | 0.1142   | 0.67      | 0.0761            | 0             | 8     |
| Greece             | Plagia, Acheloos, GR                      | GR5      | 0      | 0.00 | 0.0000    | 0             | 0     | 1.0000   | 1.00      | 1.0000            | 4             | 12    |
| Greece             | Paleochori, Sperchiada, GR                | GR6      | 0.2358 | 0.75 | 0.1768    | 2             | 9     | 0.5426   | 0.83      | 0.4522            | 2             | 10    |
| Italy              | Ai Boschi Castelminio, Treviso, IT        | IT1      | 0.3172 | 1.00 | 0.3172    | 3             | 12    | 0.6205   | 1.00      | 0.6205            | 3             | 12    |
| Italy              | Ostellato, Ferrara, IT                    | IT2      | 0.1734 | 0.83 | 0.1439    | 2             | 10    | 0.5249   | 0.83      | 0.4374            | 2             | 10    |
| Italy              | Sassocorvaro, Pesaro, IT                  | IT3      | 0.2519 | 0.92 | 0.2318    | 2             | 11    | 0.5932   | 1.00      | 0.5932            | 3             | 12    |
| Italy              | Campoli, Teramo, IT                       | IT4      | 0.6462 | 1.00 | 0.6462    | 3             | 12    | 0.5553   | 0.83      | 0.4627            | 2             | 10    |
| Italy              | Acquaviva Collecroce, Campobasso, IT      | IT5      | 0.4772 | 0.83 | 0.3961    | 3             | 10    | 0.8407   | 1.00      | 0.8407            | 4             | 12    |
| Montenegro         | Lipa, Cetinje, MN                         | MN1      | 0.3558 | 0.92 | 0.3274    | 3             | 11    | 0.6800   | 1.00      | 0.6800            | 3             | 12    |
| Romania            | Unnamed, Casimcea, RM                     | RM1      | 0.0515 | 0.25 | 0.0129    | 1             | 3     | 0.5281   | 0.92      | 0.4841            | 2             | 11    |
| Romania            | Valea Seman, Urlati, RM                   | RM2      | 0.0437 | 0.42 | 0.0184    | 1             | 5     | 0.5517   | 1.00      | 0.5517            | 3             | 12    |
| Romania            | Maneciu-Ungureni, Maneciu, RM             | RM3      | 0.0437 | 0.42 | 0.0184    | 1             | 5     | 0.5517   | 1.00      | 0.5517            | 3             | 12    |
| Romania            | Unnamed, Bustuchin, RM                    | RM4      | 0.0886 | 0.42 | 0.0372    | 1             | 5     | 0.5477   | 1.00      | 0.5477            | 3             | 12    |
| Romania            | Piscu Nou, Piscu Vechi, RM                | RM5      | 0.1071 | 0.42 | 0.0450    | 1             | 5     | 0.5029   | 1.00      | 0.5029            | 3             | 12    |
| Romania            | Valcelele de Sus, Valcele, RM             | RM6      | 0.0591 | 0.42 | 0.0248    | 1             | 5     | 0.5096   | 1.00      | 0.5096            | 3             | 12    |
| Romania            | Runc, Zlatna, RM                          | RM7      | 0.1476 | 0.50 | 0.0738    | 1             | 6     | 0.5677   | 1.00      | 0.5677            | 3             | 12    |
| Romania            | Strugureni, Chiochis, RM                  | RM8      | 0.0816 | 0.50 | 0.0408    | 1             | 6     | 0.5501   | 1.00      | 0.5501            | 3             | 12    |
| Romania            | Cuza Voda, racovita, RM                   | RM9      | 0.0464 | 0.42 | 0.0195    | 1             | 5     | 0.5170   | 1.00      | 0.5170            | 3             | 12    |
| Romania            | Razim lake, RM                            | RM10     | 0.5397 | 0.42 | 0.2267    | 2             | 5     | 0.5344   | 1.00      | 0.5344            | 3             | 12    |
| Romania            | Podul Lung, Calarasi, MLD                 | RM11     | 0.0321 | 0.83 | 0.0266    | 1             | 10    | 0.6056   | 0.83      | 0.5047            | 3             | 10    |
| Romania            | Caltesti, Pietroasele, RM                 | RM12     | 0.0448 | 0.33 | 0.0148    | 1             | 4     | 0.5005   | 1.00      | 0.5005            | 3             | 12    |
| Slovenia           | Vedrijan, SL                              | SL1      | 0.2465 | 0.67 | 0.1651    | 2             | 8     | 0.6700   | 1.00      | 0.6700            | 3             | 12    |
| Ukraine            | Verkhni Stanivtsi, Chernivtsi Oblast, UKR | UKR1     | 0.0793 | 0.33 | 0.0262    | 1             | 4     | 0.6323   | 0.83      | 0.5269            | 3             | 10    |
| Ukraine            | Pavlivka, Odessa Oblast, UKR              | UKR2     | 0.1401 | 0.50 | 0.0701    | 1             | 6     | 0.5669   | 0.83      | 0.4724            | 2             | 10    |

|                                      |                                     | <i>Pgt</i> |               |               |               |             |             | <i>Barberry</i> |               |                   |               |               |
|--------------------------------------|-------------------------------------|------------|---------------|---------------|---------------|-------------|-------------|-----------------|---------------|-------------------|---------------|---------------|
| Region and                           |                                     |            | MINF          | Fav-month     | Favourable    | Risk        |             | NHTT            | Fav-month     | Favourable growth | Suitability   |               |
| Country                              | Location                            | Code       | (B)           | (F)           | index (B x F) | score       | Month       | (D)             | (F)           | index (D x F)     | score         | Months        |
| Ukraine                              | Creamian Peninsula, UKR             | UKR3       | 0.2909        | 0.67          | 0.1949        | 2           | 8           | 0.5416          | 1.00          | 0.5416            | 3             | 12            |
| Ukraine                              | Sevastopol 1, Crimean, UKR          | UKR4       | 0.0854        | 0.50          | 0.0427        | 1           | 6           | 0.5770          | 0.83          | 0.4808            | 2             | 10            |
| Ukraine                              | Sevastopol 2, Crimean, UKR          | UKR5       | 0.1597        | 0.58          | 0.0926        | 1           | 7           | 0.5900          | 0.83          | 0.4917            | 2             | 10            |
| Ukraine                              | Novohryhorivka, Kherson Oblast, UKR | UKR6       | 0.5046        | 0.83          | 0.4188        | 3           | 10          | 0.6231          | 0.75          | 0.4673            | 2             | 9             |
| Ukraine                              | Yelyseivka, Zaporizhia Oblast, UKR  | UKR7       | 0.2682        | 0.75          | 0.2011        | 2           | 9           | 0.5855          | 0.83          | 0.4879            | 2             | 10            |
| Ukraine                              | Ahronomichne, Donetsk Oblast, UKR   | UKR8       | 0.0530        | 0.33          | 0.0175        | 1           | 4           | 0.4730          | 1.00          | 0.4730            | 2             | 12            |
| Ukraine                              | Shtormove, Luhansk Oblast, UKR      | UKR9       | 0.0448        | 0.50          | 0.0224        | 1           | 6           | 0.4157          | 1.00          | 0.4157            | 2             | 12            |
| Ukraine                              | Zavadiivka, Kirovohrad Oblast, UKR  | UKR10      | 0.0480        | 0.42          | 0.0202        | 1           | 5           | 0.4775          | 1.00          | 0.4775            | 2             | 12            |
| Ukraine                              | Kunychche, Vinnytsia Oblast, UKR    | UKR11      | 0.0280        | 0.33          | 0.0092        | 1           | 4           | 0.4850          | 1.00          | 0.4850            | 2             | 12            |
| Ukraine                              | Potaptsi, Cherkasy Oblast, UKR      | UKR12      | 0.0911        | 0.42          | 0.0382        | 1           | 5           | 0.4186          | 1.00          | 0.4186            | 2             | 12            |
| Ukraine                              | Kalivka, Sumy Oblast, UKR           | UKR13      | 0.0837        | 0.42          | 0.0351        | 1           | 5           | 0.4616          | 1.00          | 0.4616            | 2             | 12            |
| Ukraine                              | Rohovchi, Khmelnytskyi Oblast, UKR  | UKR14      | 0.0624        | 0.50          | 0.0312        | 1           | 6           | 0.5014          | 1.00          | 0.5014            | 3             | 12            |
| Ukraine                              | Novi Sokoly, Kyiv Oblast, UKR       | UKR15      | 0.0906        | 0.50          | 0.0453        | 1           | 6           | 0.0927          | 1.00          | 0.0927            | 0             | 12            |
| <b>Total number of sites or mean</b> |                                     | <b>607</b> | <b>0.1099</b> | <b>0.3305</b> | <b>0.0679</b> | <b>####</b> | <b>3.97</b> | <b>0.3974</b>   | <b>0.8129</b> | <b>0.3608</b>     | <b>1.7957</b> | <b>9.8616</b> |

**Table S2.** Numbers and percentages of locations in Asian and Southwest European regions with different stripe rust infection suitability scores.

| Region (locations)    | Number (%) of sites with different infection score ( $MINF \times F$ ) <sup>a</sup> |           |          |          |         |            |
|-----------------------|-------------------------------------------------------------------------------------|-----------|----------|----------|---------|------------|
|                       | 0                                                                                   | 1         | 2        | 3        | 4       | 1 to 4     |
| East Asia (250)       | 63(25.2*)                                                                           | 163(65.2) | 24(9.6)  | 0        | 0       | 187(74.8)) |
| Central Asia (195)    | 54(27.7)                                                                            | 114(58.5) | 15(7.7)  | 10(5.1)  | 2(1.0)  | 141(72.3)) |
| Northwest Asia (59)   | 1(1.7)                                                                              | 42(71.2)  | 6(10.2)  | 7(11.9)  | 3(5.1)  | 58(98.3)   |
| Southwest Asia (50)   | 40(80)                                                                              | 9(18)     | 0        | 1(2)     | 0       | 10(20.0)   |
| Southeast Europe (53) | 0                                                                                   | 32(60.4)  | 10(18.9) | 10(18.9) | 1(1.9)  | 53(100.0)  |
| Total (607)           | 158(26.0)                                                                           | 360(59.3) | 55(0.09) | 28(0.05) | 6(0.01) | 449(74.0)  |

<sup>a</sup>  $MINF$  = normalized mean monthly infection index;  $F$  = Fav-month; Scores: 0 = 0 to 0.0080; 1 = 0.0081 to 0.1000; 2 = 0.1001 to 0.3000; 3 = 0.3001 to 0.7000; and 4 = 0.7001 to 1.0.

**Table S3.** Numbers and percentages of locations in Asian and Southwest European regions with different stem rust infection suitability scores.

| Region (locations)    | Number (%) of sites with different infection score ( $MINF \times F$ ) <sup>a</sup> |          |           |            |          |           |
|-----------------------|-------------------------------------------------------------------------------------|----------|-----------|------------|----------|-----------|
|                       | 0                                                                                   | 1        | 2         | 3          | 4        | 1 to 4    |
| East Asia (250)       | 61(24.4)                                                                            | 35(14)   | 82(32.8)  | 68(27.2)   | 4(1.6)   | 189(75.6) |
| Central Asia (195)    | 54(27.7)                                                                            | 21(10.8) | 48(24.6)  | 58(29.7)   | 14(7.2)  | 141(72.3) |
| Northwest Asia (59)   | 1(1.7)                                                                              | 7(11.9)  | 26(44.1)  | 18(30.5)   | 7(11.9)  | 58(98.3)  |
| Southwest Asia (50)   | 38(76)                                                                              | 5(10)    | 4(8)      | 3(6)       | 0        | 12(24.0)  |
| Southeast Europe (53) | 0                                                                                   | 0        | 6(11.3)   | 33(62.3)   | 14(26.4) | 53(100.0) |
| Total (607)           | 154(25.4)                                                                           | 68(11.2) | 166(27.3) | 180((29.7) | 39(0.06) | 453(74.6) |

<sup>a</sup>  $MINF$  = normalized mean monthly infection index;  $F$  = Fav-month; Scores: 0 = 0 to 0.0080; 1 = 0.0081 to 0.1000; 2 = 0.1001 to 0.3000; 3 = 0.3001 to 0.7000; and 4 = 0.7001 to 1.0.

**Table S4.** Numbers and percentages of locations in Asian and Southwest European regions with different barberry growth suitability scores.

| Region (locations)    | Number (%) of sites with different growth score ( $NHTT \times F$ ) <sup>a</sup> |           |           |           |         |           |
|-----------------------|----------------------------------------------------------------------------------|-----------|-----------|-----------|---------|-----------|
|                       | 0                                                                                | 1         | 2         | 3         | 4       | 1 to 4    |
| East Asia (250)       | 57(22.8)                                                                         | 43(17.2)  | 84(33.6)  | 45(18.0)  | 21(8.4) | 193(77.2) |
| Central Asia (195)    | 9(4.6)                                                                           | 50(25.6)  | 85(43.6)  | 49(25.1)  | 2(1.1)  | 186(95.4) |
| Northwest Asia (59)   | 2(3.4)                                                                           | 7(11.9)   | 15(25.4)  | 35(59.3)  | 0       | 57(96.6)  |
| Southwest Asia (50)   | 38(76)                                                                           | 11(22)    | 1(2)      | 0         | 0       | 12(24.0)  |
| Southeast Europe (53) | 3(5.7)                                                                           | 1(1.9)    | 21(39.6)  | 25(47.2)  | 3(5.7)  | 50(94.3)  |
| Total (607)           | 109(18.0)                                                                        | 112(18.5) | 206(33.9) | 154(25.4) | 26(4.3) | 498(82.0) |

<sup>a</sup>  $MINF$  = normalized mean monthly infection index;  $F$  = Fav-month; Scores: 0 = 0 to 0.0080; 1 = 0.0081 to 0.1000; 2 = 0.1001 to 0.3000; 3 = 0.3001 to 0.7000; and 4 = 0.7001 to 1.0.

**Table S5.** Scores of infections of *Puccinia striiformis* f. sp. *tritici* (*Pst*) and *P. graminis* f. sp. *tritici* (*Pgt*) on barberry and barberry growth predicted using the framework of this study and the Dymex model for selected locations in the U.S. Pacific and western China with reported barberry growth and the correlation of the two model results determined using Cohen's Kappa coefficient (*k*).

| Location             | Code  | Lat°N   | Long°W    | Elev (m) | Infection or growth score                                               |            |          |             |            |          |
|----------------------|-------|---------|-----------|----------|-------------------------------------------------------------------------|------------|----------|-------------|------------|----------|
|                      |       |         |           |          | Framework                                                               |            |          | Dymex model |            |          |
|                      |       |         |           |          | <i>Pst</i>                                                              | <i>Pgt</i> | Barberry | <i>Pst</i>  | <i>Pgt</i> | Barberry |
| <b>U.S. Pacific</b>  |       |         |           |          | <b><i>k</i> = 0.68 (<i>Pst</i>); 0.50 (<i>Pgt</i>); 0.50 (barberry)</b> |            |          |             |            |          |
| Red Sport, OR        | US3   | 43.7018 | -123.8298 | 244.9    | 3                                                                       | 4          | 4        | 3           | 4          | 4        |
| Cox Bar, CA          | US4   | 40.9738 | -123.1267 | 1027.5   | 2                                                                       | 1          | 4        | 3           | 2          | 4        |
| Cle-Elm-Roslyn, WA   | US5   | 47.1544 | -121.2810 | 1199.3   | 2                                                                       | 2          | 4        | 2           | 2          | 2        |
| Hood Canal, WA       | US6   | 47.5711 | -123.3903 | 500.9    | 4                                                                       | 4          | 4        | 4           | 4          | 4        |
| Bend, OR             | US7   | 43.8604 | -120.9734 | 1378.8   | 3                                                                       | 3          | 3        | 3           | 4          | 4        |
| Lake County, OR      | US8   | 42.3851 | -120.7976 | 1609.9   | 2                                                                       | 2          | 3        | 2           | 3          | 2        |
| Big Creek, CA        | US9   | 37.5382 | -118.9519 | 2433.4   | 0                                                                       | 0          | 3        | 0           | 1          | 0        |
| Whitman, WA          | US10  | 46.9401 | -117.5264 | 630.7    | 0                                                                       | 0          | 3        | 1           | 0          | 4        |
| Ellensburg, WA       | US11  | 46.9846 | -120.5263 | 869.1    | 0                                                                       | 0          | 3        | 1           | 1          | 3        |
| Lincoln, WA          | US12  | 47.5428 | -118.5969 | 664.7    | 0                                                                       | 0          | 3        | 1           | 0          | 4        |
| <b>Western China</b> |       |         |           |          | <b><i>k</i> = 0.68 (<i>Pst</i>); 0.56 (<i>Pgt</i>); 0.40 (barberry)</b> |            |          |             |            |          |
| Aba, Sichuan         | CH106 | 31.8975 | 102.2082  | 3830.1   | 0                                                                       | 0          | 3        | 0           | 0          | 2        |
| Baoji-1, Shaanxi     | CH107 | 34.3787 | 107.1298  | 1368.9   | 0                                                                       | 0          | 3        | 1           | 1          | 1        |
| Bazhong, Sichuan     | CH108 | 31.8666 | 106.7181  | 597.9    | 0                                                                       | 2          | 2        | 0           | 2          | 2        |
| Chengxian, Gansu     | CH109 | 33.7436 | 105.6880  | 1489.3   | 0                                                                       | 0          | 3        | 0           | 1          | 2        |
| Dali, Yunnan         | CH110 | 25.6058 | 100.1786  | 2212.9   | 0                                                                       | 0          | 3        | 0           | 1          | 3        |
| Degen, Yunnan        | CH111 | 24.1786 | 100.7496  | 1714.4   | 0                                                                       | 0          | 2        | 1           | 0          | 2        |
| Deyang, Sichuan      | CH112 | 31.1405 | 104.3301  | 979.2    | 1                                                                       | 2          | 3        | 1           | 2          | 3        |
| Dinxi, Gansu         | CH113 | 35.5888 | 104.6410  | 1982.8   | 0                                                                       | 0          | 3        | 0           | 0          | 2        |
| Fengxian, Shaanxi    | CH114 | 33.9258 | 106.5501  | 1444.4   | 0                                                                       | 0          | 3        | 0           | 1          | 2        |
| Gangu, Gansu         | CH115 | 34.7232 | 105.3472  | 1852.8   | 0                                                                       | 0          | 3        | 1           | 0          | 3        |
| Gannan, Gansu        | CH116 | 36.4891 | 103.6229  | 2022.9   | 0                                                                       | 0          | 3        | 0           | 1          | 3        |
| Ganzi, Sichuan       | CH117 | 30.0683 | 101.9874  | 3897.4   | 0                                                                       | 0          | 3        | 0           | 1          | 2        |
| Guangyuan, Sichuan   | CH118 | 32.4557 | 105.4557  | 845.9    | 0                                                                       | 2          | 3        | 1           | 2          | 3        |
| Haixi, Qinghai       | CH119 | 37.3859 | 97.3790   | 3362.6   | 0                                                                       | 0          | 3        | 0           | 1          | 1        |
| Hanzhong, Shaanxi    | CH120 | 33.0695 | 106.9625  | 1140.6   | 2                                                                       | 0          | 3        | 2           | 0          | 2        |
| Huixian, Gansu       | CH121 | 33.7688 | 106.0569  | 1402.6   | 0                                                                       | 0          | 3        | 0           | 1          | 3        |
| Lueyang, Shaanxi     | CH122 | 34.6303 | 107.1306  | 1249.6   | 0                                                                       | 0          | 3        | 1           | 1          | 2        |
| Kunming, Yunan       | CH123 | 24.9522 | 102.8935  | 1938.5   | 0                                                                       | 0          | 2        | 0           | 0          | 1        |
| Lanzhou, Gansu       | CH124 | 36.4891 | 103.6229  | 2022.9   | 0                                                                       | 0          | 3        | 1           | 0          | 2        |
| Liangdang, Gansu     | CH125 | 33.9050 | 106.2660  | 1402.6   | 0                                                                       | 0          | 3        | 0           | 0          | 3        |

|                  |       |         |          |        |   |   |   |   |   |   |
|------------------|-------|---------|----------|--------|---|---|---|---|---|---|
| Aba, Sichuan     | CH106 | 31.8975 | 102.2082 | 3830.1 | 0 | 0 | 3 | 0 | 0 | 3 |
| Baoji-2, Shaanxi | CH107 | 34.3787 | 107.1298 | 1368.9 | 0 | 0 | 3 | 2 | 1 | 2 |
| Bazhong, Sichuan | CH108 | 31.8666 | 106.7181 | 597.9  | 0 | 2 | 3 | 0 | 2 | 2 |
| Chengxian, Gansu | CH109 | 33.7436 | 105.6880 | 1489.3 | 0 | 2 | 3 | 0 | 2 | 3 |
| Dali, Yunnan     | CH110 | 25.6058 | 100.1786 | 2212.9 | 0 | 0 | 3 | 1 | 1 | 2 |

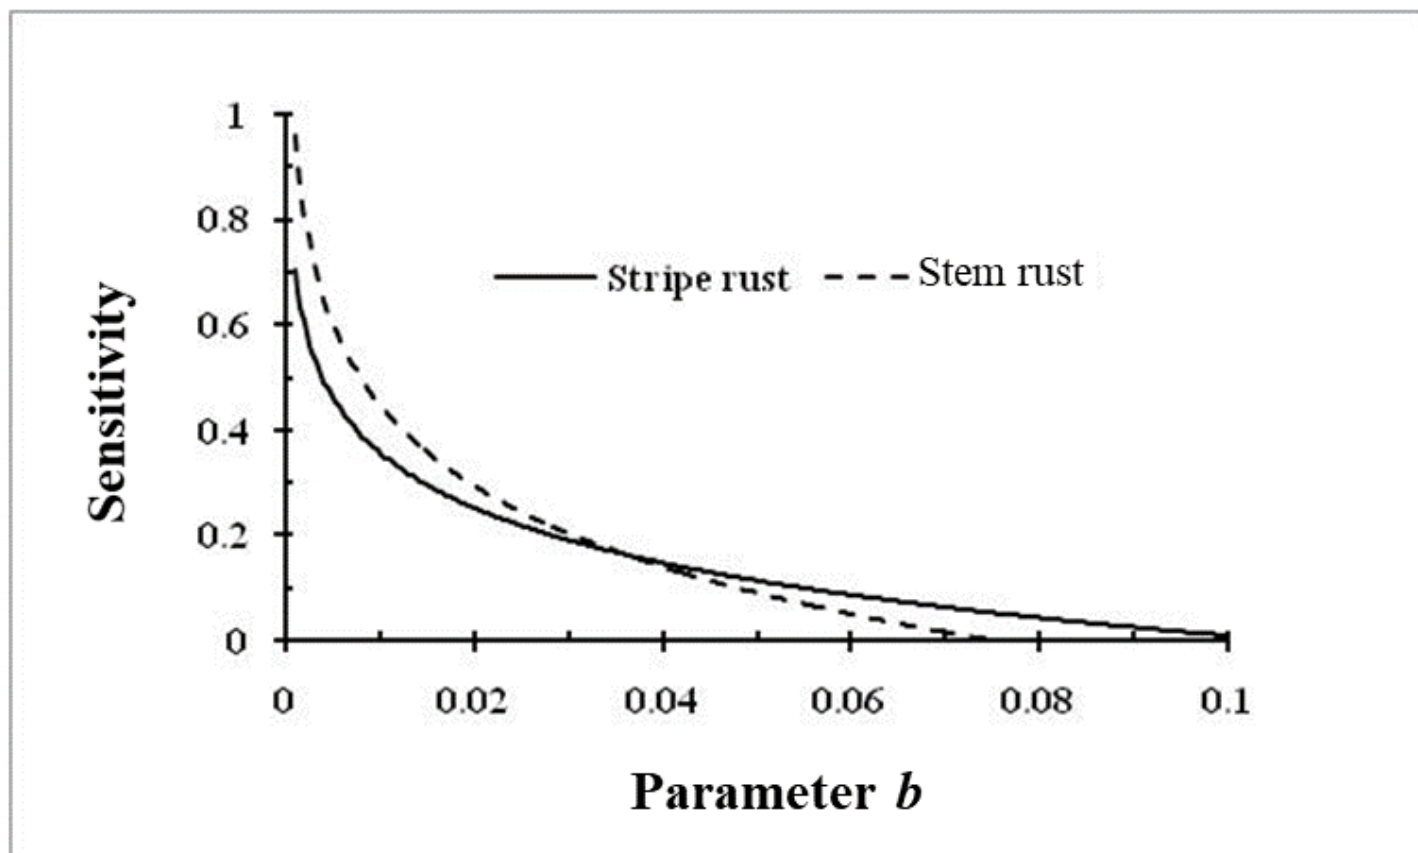

Fig. S1

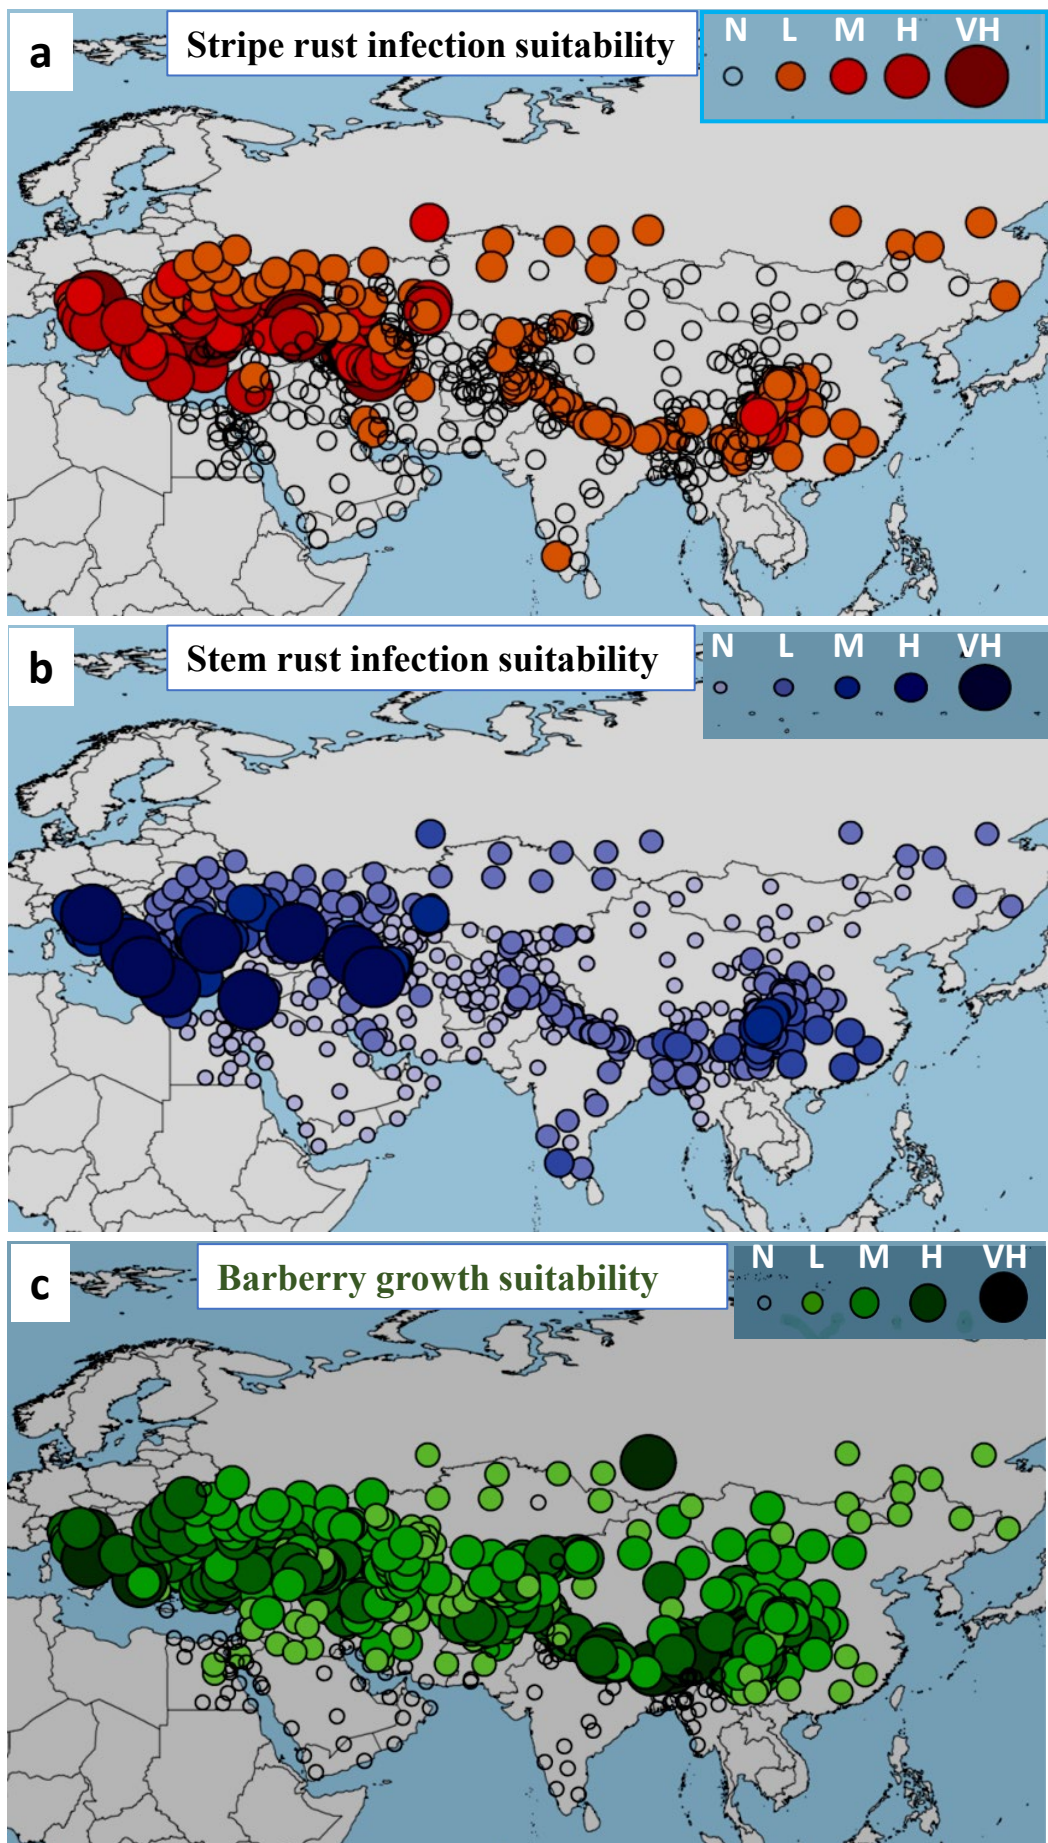

Fig. S2

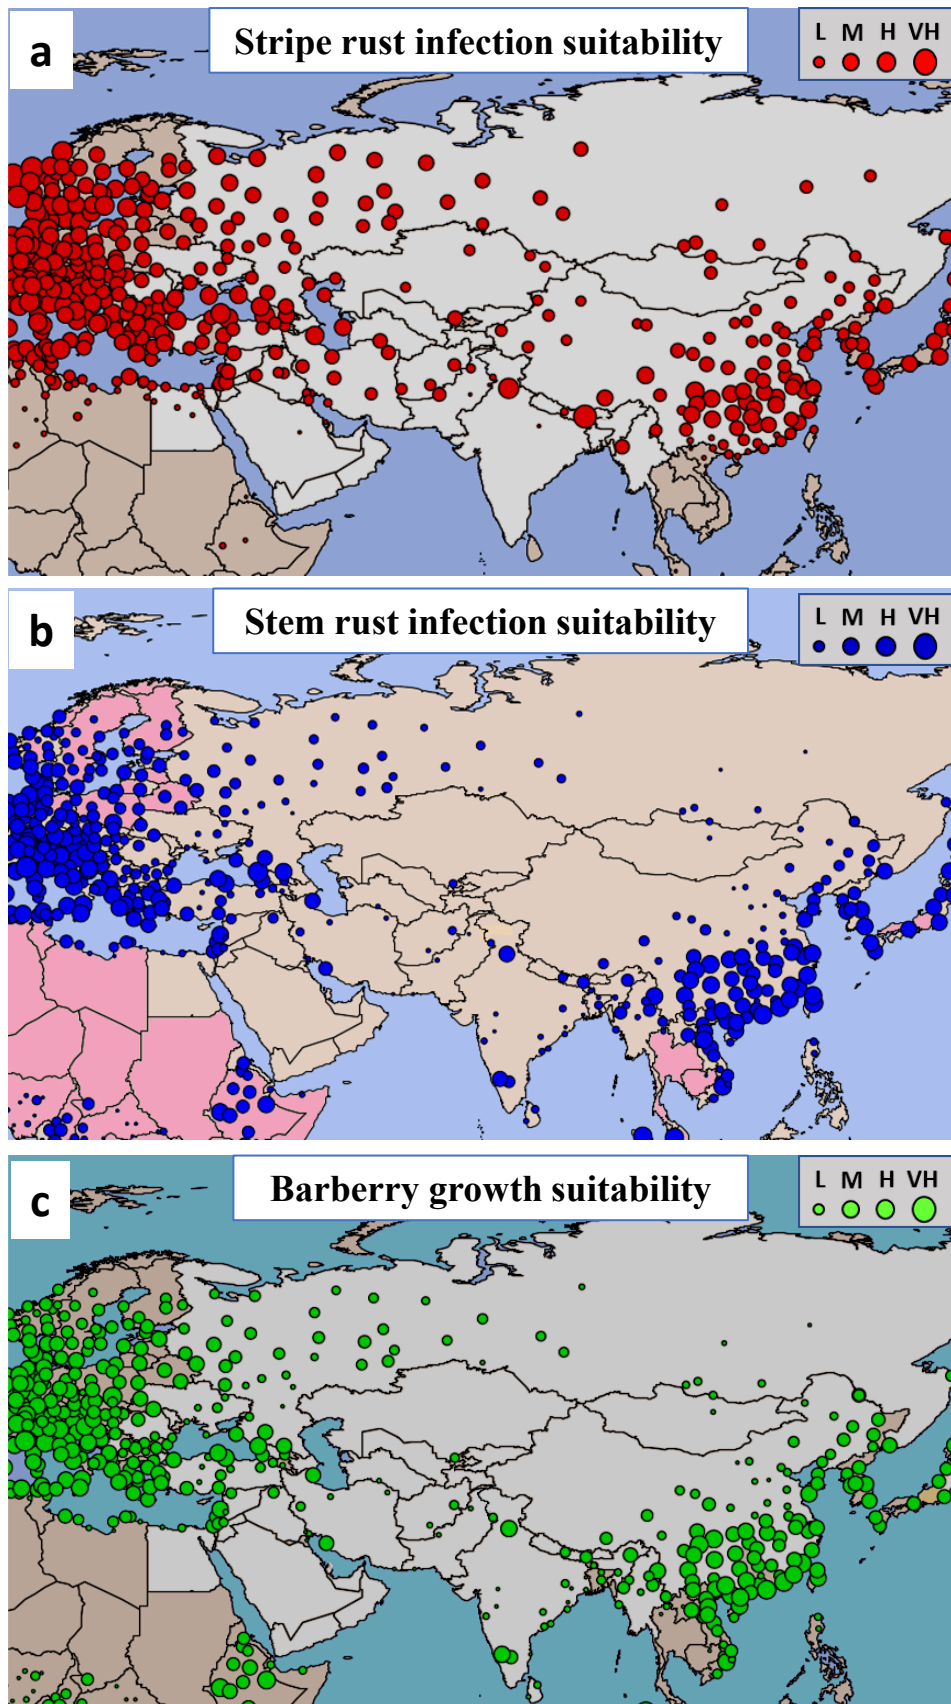

Fig. S3
